# Supplementary material for: Rhodium(iii)-catalyzed oxidative annulation of isoquinolones with allyl alcohols: synthesis of isoindolo[2,1-b]isoquinolin-5(7H)-ones
Source: Royal Society of Chemistry journal article supplement (doi:10.1039/d1ob02305e), 2021-12-11
Supplement: d1ob02305e1.pdf [file d1ob02305e1.pdf]

## Supporting Information

### **Rhodium(III)-catalyzed oxidative annulation of isoquinolones with allyl alcohols: synthesis of isoindolo[2,1-*b*]isoquinolin-5(7*H*)-ones**

Jinyuan Jiang, Jidan Liu,\* Zhenke Yang, Jieying Zheng, Xin Tian, Liyao Zheng,  
and Zhao-Qing Liu\*

*School of Chemistry and Chemical Engineering/Institute of Clean Energy and Materials/Guangzhou Key Laboratory for Clean Energy and Materials, Guangzhou University, Guangzhou, 510006, P. R. China*

### **Table of contents**

|                                                                                 |     |
|---------------------------------------------------------------------------------|-----|
| 1. General information .....                                                    | S1  |
| 2. General procedure for the synthesis of isoindoloisoquinolones <b>3</b> ..... | S1  |
| 3. Scale-up experiment and one-pot synthesis of isoindoloisoquinolones.....     | S1  |
| 4. Mechanistic studies.....                                                     | S3  |
| 5. Characterization data of products.....                                       | S5  |
| 6. Copies of NMR spectra.....                                                   | S25 |
| 7. The X-ray crystal structure for compound <b>3a</b> .....                     | S59 |
| 8. References.....                                                              | S60 |

## 1. General information

All reactions were carried out without any particular precautions to extrude moisture or oxygen. The NMR spectra were recorded on the Bruker spectrometer in CDCl<sub>3</sub> at room temperature. <sup>1</sup>H NMR (600 MHz) chemical shifts ( $\delta$ ) were referenced to internal standard TMS ( $\delta = 0.00$  ppm), and <sup>13</sup>C{<sup>1</sup>H} NMR (151 MHz) chemical shifts were referenced to internal solvent CDCl<sub>3</sub> ( $\delta = 77.16$  ppm) and chemical shifts are reported as parts per million (ppm). The high-resolution mass spectrometric data was recorded on Waters Synapt G2 Si tandem mass spectrometer with electron spray ionization (ESI) source. Products were purified by flash column chromatography on silica gel (200-300 mesh) with freshly distilled ethyl acetate (EA) and petroleum ether (PE). But-3-en-2-ol **2a** is a commercial material, isoquinolones **1**,<sup>1</sup> and allyl alcohols **2b-2n**<sup>2</sup> were prepared according to the reported procedures. Other reagents and solvents were obtained from commercial suppliers and used without further purification unless otherwise noted.

## 2. General procedure for the synthesis of isoindoloisoquinolones 3

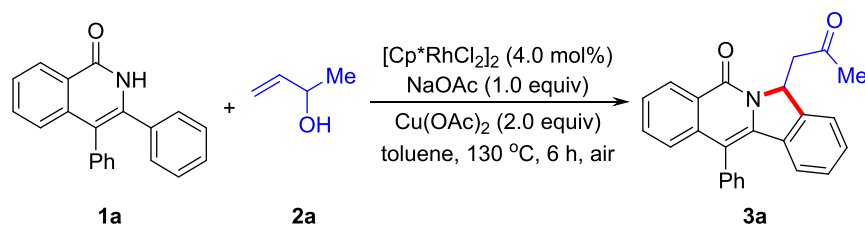

To an oven-dried sealed tube charged with isoquinolone **1a** (59.4 mg, 0.2 mmol), [Cp\*RhCl<sub>2</sub>]<sub>2</sub> (5 mg, 4 mol%), NaOAc (16.4 mg, 0.2 mmol), and Cu(OAc)<sub>2</sub> (73 mg, 0.4 mmol) were added but-3-en-2-ol **2a** (22 mg, 0.3 mmol) and toluene (1 mL) at room temperature. The reaction mixture was allowed to stir in an oil bath at 130 °C under air for 6 h. After completion of the reaction (monitored by TLC), the reaction mixture was cooled to room temperature, diluted with EtOAc (10 mL) and concentrated in vacuo. The residue was purified by flash column chromatography (PE/EA = 4:1) to afford 62.8 mg of **3a** in 86% yield as a yellow solid.

## 3. Scale-up experiment and one-pot synthesis of isoindoloisoquinolones

### (a) Scale-up synthesis of **3a**

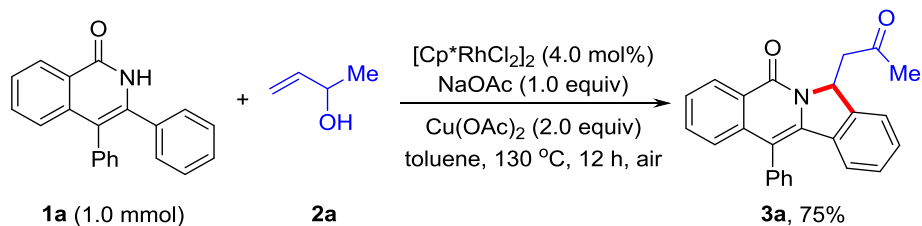

To an oven-dried sealed tube charged with isoquinolone **1a** (297 mg, 1.0 mmol),  $[\text{Cp}^*\text{RhCl}_2]_2$  (25 mg, 4 mol%), NaOAc (82 mg, 1.0 mmol), and  $\text{Cu}(\text{OAc})_2$  (364 mg, 2.0 mmol) were added but-3-en-2-ol **2a** (108 mg, 1.5 mmol) and toluene (5 mL) at room temperature. The reaction mixture was allowed to stir in an oil bath at 130 °C under air for 12 h. After completion of the reaction (monitored by TLC), the reaction mixture was cooled to room temperature, diluted with EtOAc (10 mL) and concentrated in vacuo. The residue was purified by flash column chromatography (PE/EA = 4:1) to afford 274 mg of **3a** in 75% yield as a yellow solid.

### (b) One-pot synthesis of **3** from *N*-methoxybenzamides

(b) One-pot synthesis

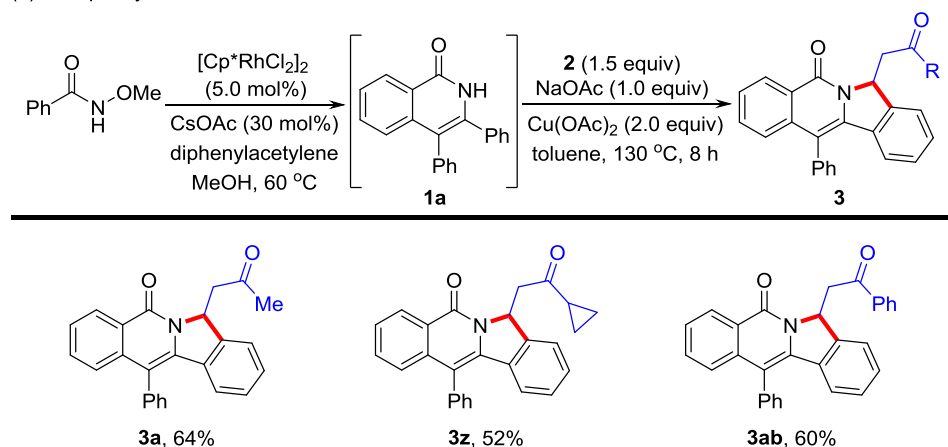

To an oven-dried sealed tube charged with *N*-methoxybenzamide (30.2 mg, 0.2 mmol),  $[\text{Cp}^*\text{RhCl}_2]_2$  (6 mg, 5 mol%), CsOAc (12 mg, 30 mol%), and diphenylacetylene (40 mg, 0.22 mmol) were added methanol (1 mL) at room temperature. The reaction mixture was allowed to stir in an oil bath at 60 °C under air for 14 h. After removal of methanol under reduced pressure, NaOAc (16.4 mg, 0.2 mmol),  $\text{Cu}(\text{OAc})_2$  (73 mg, 0.4 mmol), but-3-en-2-ol **2a** (22 mg, 0.3 mmol), and toluene (1 mL) were added. The reaction mixture was allowed to stir in an oil bath at 130 °C under air for 8 h. After completion of the reaction, the reaction mixture was cooled to room temperature, diluted with EtOAc (10 mL) and

concentrated in vacuo. The residue was purified by flash column chromatography (PE/EA = 4:1) to afford 46.7 mg of **3a** in 64% yield as a yellow solid.

#### 4. Mechanistic studies

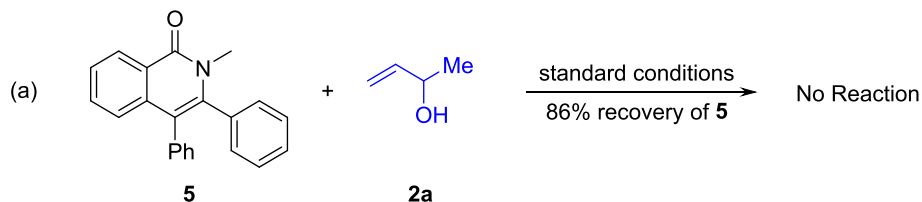

To an oven-dried sealed tube charged with *N*-methyl substituted isoquinolone **5** (63 mg, 0.2 mmol), [Cp\**RhCl*<sub>2</sub>]<sub>2</sub> (5 mg, 4 mol%), NaOAc (16.4 mg, 0.2 mmol), and Cu(OAc)<sub>2</sub> (73 mg, 0.4 mmol) were added but-3-en-2-ol **2a** (22 mg, 0.3 mmol) and toluene (1 mL) at room temperature. The reaction mixture was allowed to stir in an oil bath at 130 °C under air for 6 h. After isolation and purification, *N*-methyl substituted isoquinolone **5** was recovered in 86%, showing that the relatively acidic NH in **1a** plays a pivotal role in aryl C-H activation.

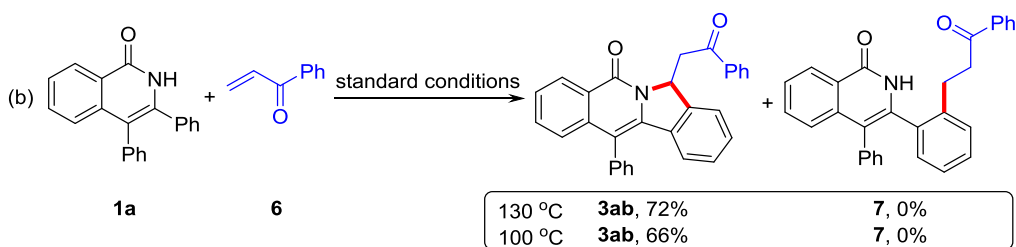

To an oven-dried sealed tube charged with isoquinolone **1a** (59.4 mg, 0.2 mmol), [Cp\**RhCl*<sub>2</sub>]<sub>2</sub> (5 mg, 4 mol%), NaOAc (16.4 mg, 0.2 mmol), and Cu(OAc)<sub>2</sub> (73 mg, 0.4 mmol) were added phenyl vinyl ketone **6** (40 mg, 0.3 mmol) and toluene (1 mL) at room temperature. The reaction mixture was allowed to stir in an oil bath at 130 °C under air for 6 h. After completion of the reaction (monitored by TLC), the reaction mixture was cooled to room temperature, diluted with EtOAc (10 mL) and concentrated in vacuo. The residue was purified by flash column chromatography (PE/EA = 4:1) to afford 61.5 mg of **3ab** in 72% yield as a yellow solid (56.4 mg of **3ab** in 66% yield at 100 °C).

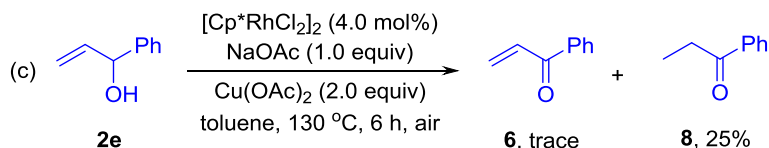

To an oven-dried sealed tube charged with  $[\text{Cp}^*\text{RhCl}_2]_2$  (5 mg, 4 mol%), NaOAc (16.4 mg, 0.2 mmol), and  $\text{Cu(OAc)}_2$  (73 mg, 0.4 mmol) were added 1-phenylprop-2-en-1-ol **2e** (40 mg, 0.3 mmol) and toluene (1 mL) at room temperature. The reaction mixture was allowed to stir in an oil bath at 130 °C under air for 6 h. After completion of the reaction (monitored by TLC), the reaction mixture was cooled to room temperature, diluted with EtOAc (10 mL) and concentrated in vacuo. The residue was purified by flash column chromatography (PE/EA = 20:1) to afford 10 mg of **8** in 25% yield as a colorless oil.

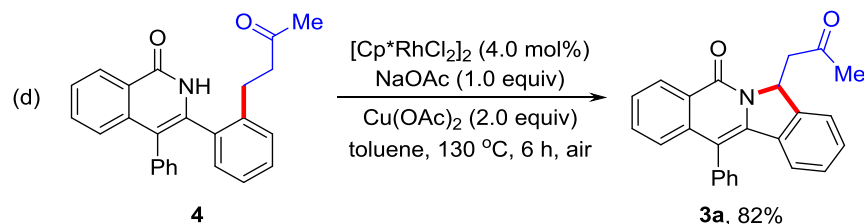

To an oven-dried sealed tube charged with the C-H alkylated product **4** (74 mg, 0.2 mmol),  $[\text{Cp}^*\text{RhCl}_2]_2$  (5 mg, 4 mol%), NaOAc (16.4 mg, 0.2 mmol), and  $\text{Cu(OAc)}_2$  (73 mg, 0.4 mmol) were added toluene (1 mL) at room temperature. The reaction mixture was allowed to stir in an oil bath at 130 °C under air for 6 h. After completion of the reaction (monitored by TLC), the reaction mixture was cooled to room temperature, diluted with EtOAc (10 mL) and concentrated in vacuo. The residue was purified by flash column chromatography (PE/EA = 4:1) to afford 60 mg of **3a** in 82% yield as a yellow solid.

## 5. Characterization data of products

### 7-(2-Oxopropyl)-12-phenylisoindolo[2,1-*b*]isoquinolin-5(7*H*)-one (3a)

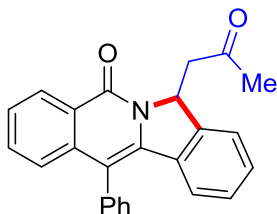

Following the general procedure, the title compound was isolated by flash chromatography (eluent: ethyl acetate/petrol ether = 1/4) as a yellow solid in 86% yield;

**M.p.** = 196-197 °C;

**<sup>1</sup>H NMR** (600 MHz, CDCl<sub>3</sub>): δ 8.52 (dd, *J* = 8.0, 1.4 Hz, 1H), 7.62-7.55 (m, 4H), 7.53-7.48 (m, 2H), 7.46-7.43 (m, 1H), 7.37-7.34 (m, 1H), 7.32-7.29 (m, 1H), 7.21 (dd, *J* = 8.2, 1.1 Hz, 1H), 7.07 (dd, *J* = 8.2, 7.1 Hz, 1H), 6.38 (d, *J* = 7.9 Hz, 1H), 6.07 (dd, *J* = 8.3, 3.2 Hz, 1H), 4.02 (dd, *J* = 17.7, 3.2 Hz, 1H), 2.89 (dd, *J* = 17.7, 8.3 Hz, 1H), 2.22 (s, 3H);

**<sup>13</sup>C NMR** (151 MHz, CDCl<sub>3</sub>): δ 205.9, 161.0, 142.7, 138.9, 138.1, 135.3, 133.4, 132.3, 131.2, 131.1, 129.70, 129.66, 129.6, 128.6, 128.4, 127.4, 126.5, 125.4, 124.8, 124.1, 123.4, 114.7, 59.6, 45.9, 30.6;

**HRMS (ESI) m/z:** [M+Na]<sup>+</sup> Calcd for C<sub>25</sub>H<sub>19</sub>NNaO<sub>2</sub> 388.1308; Found 388.1312.

### 2-Methyl-7-(2-oxopropyl)-12-phenylisoindolo[2,1-*b*]isoquinolin-5(7*H*)-one (3b)

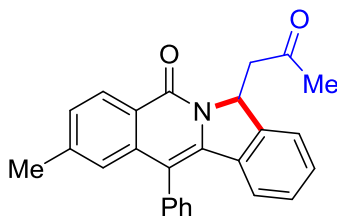

Following the general procedure, the title compound was isolated by flash chromatography (eluent: ethyl acetate/petrol ether = 1/4) as a yellow solid in 77% yield;

**M.p.** = 188-189 °C;

**<sup>1</sup>H NMR** (600 MHz, CDCl<sub>3</sub>): δ 8.39 (d, *J* = 8.1 Hz, 1H), 7.62-7.56 (m, 3H), 7.51-7.49 (m, 1H), 7.45-7.42 (m, 1H), 7.36-7.34 (m, 1H), 7.31-7.26 (m, 2H), 7.07-7.03 (m, 1H), 6.96 (s, 1H), 6.33 (d, *J* = 8.0 Hz, 1H), 6.04 (dd, *J* = 8.3, 3.2 Hz, 1H), 4.01 (dd, *J* = 17.7, 3.2 Hz, 1H), 2.87 (dd, *J* = 17.7, 8.3 Hz, 1H), 2.36 (s, 3H), 2.21 (s, 3H);

$^{13}\text{C}$  NMR (151 MHz,  $\text{CDCl}_3$ ):  $\delta$  205.9, 160.8, 142.8, 142.7, 138.9, 138.1, 135.4, 133.4, 131.2, 131.1, 129.6, 129.51, 129.50, 128.5, 128.3, 128.1, 127.3, 125.0, 123.9, 123.3, 122.6, 114.5, 59.4, 45.9, 30.5, 22.0;

**HRMS (ESI) m/z:**  $[\text{M}+\text{Na}]^+$  Calcd for  $\text{C}_{26}\text{H}_{21}\text{NNaO}_2$  402.1465; Found 402.1473.

### 2-(*Tert*-butyl)-7-(2-oxopropyl)-12-phenylisoindolo[2,1-*b*]isoquinolin-5(7*H*)-one (3c)

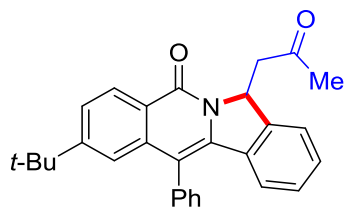

Following the general procedure, the title compound was isolated by flash chromatography (eluent: ethyl acetate/petrol ether = 1/4) as a light-yellow solid in 73% yield;

**M.p.** = 231-232 °C;

$^1\text{H}$  NMR (600 MHz,  $\text{CDCl}_3$ ):  $\delta$  8.44 (d,  $J$  = 8.4 Hz, 1H), 7.62-7.55 (m, 4H), 7.51 (dd,  $J$  = 7.7, 1.1 Hz, 1H), 7.46-7.44 (m, 1H), 7.37-7.34 (m, 1H), 7.31-7.28 (m, 1H), 7.17 (d,  $J$  = 1.8 Hz, 1H), 7.08-7.06 (m, 1H), 6.38 (d,  $J$  = 8.0 Hz, 1H), 6.06 (dd,  $J$  = 8.3, 3.2 Hz, 1H), 4.01 (dd,  $J$  = 17.6, 3.2 Hz, 1H), 2.87 (dd,  $J$  = 17.6, 8.3 Hz, 1H), 2.22 (s, 3H), 1.24 (s, 9H);

$^{13}\text{C}$  NMR (151 MHz,  $\text{CDCl}_3$ ):  $\delta$  205.9, 155.7, 142.7, 138.8, 138.0, 135.4, 133.5, 131.2, 131.1, 129.6, 129.5, 128.5, 128.3, 127.1, 124.7, 124.0, 123.4, 122.7, 121.4, 115.1, 59.5, 46.0, 35.4, 31.1, 30.6 (overlapped);

**HRMS (ESI) m/z:**  $[\text{M}+\text{Na}]^+$  Calcd for  $\text{C}_{29}\text{H}_{27}\text{NNaO}_2$  444.1934; Found 444.1933.

### 2-Methoxy-7-(2-oxopropyl)-12-phenylisoindolo[2,1-*b*]isoquinolin-5(7*H*)-one (3d)

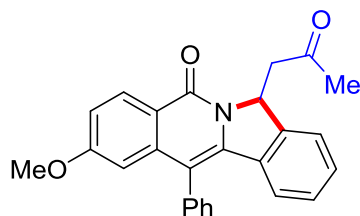

Following the general procedure, the title compound was isolated by flash chromatography (eluent: ethyl acetate/petrol ether = 1/2) as a yellow solid in 83% yield;

**M.p.** = 172-173 °C;

**<sup>1</sup>H NMR** (600 MHz, CDCl<sub>3</sub>): δ 8.42 (d, *J* = 8.8 Hz, 1H), 7.60-7.54 (m, 3H), 7.51-7.48 (m, 1H), 7.44-7.42 (m, 1H), 7.36-7.33 (m, 1H), 7.30-7.27 (m, 1H), 7.07-7.03 (m, 2H), 6.54 (d, *J* = 2.5 Hz, 1H), 6.36-6.32 (m, 1H), 6.02 (dd, *J* = 8.3, 3.2 Hz, 1H), 4.01 (dd, *J* = 17.6, 3.2 Hz, 1H), 3.71 (s, 3H), 2.86 (dd, *J* = 17.6, 8.3 Hz, 1H), 2.21 (s, 3H);

**<sup>13</sup>C NMR** (151 MHz, CDCl<sub>3</sub>): δ 205.9, 162.8, 160.6, 142.9, 140.9, 138.6, 135.3, 133.3, 131.1, 131.0, 129.63, 129.61, 129.6, 129.4, 128.6, 128.3, 124.0, 123.4, 118.8, 115.2, 114.3, 107.1, 59.4, 55.4, 46.0, 30.5;

**HRMS (ESI) m/z:** [M+Na]<sup>+</sup> Calcd for C<sub>26</sub>H<sub>21</sub>NNaO<sub>3</sub> 418.1414; Found 418.1401.

### 7-(2-Oxopropyl)-2,12-diphenylisoindolo[2,1-*b*]isoquinolin-5(7*H*)-one (3e)

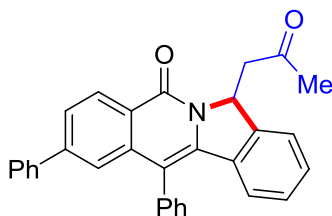

Following the general procedure, the title compound was isolated by flash chromatography (eluent: ethyl acetate/petrol ether = 1/4) as a yellow solid in 65% yield;

**M.p.** = 202-203 °C;

**<sup>1</sup>H NMR** (600 MHz, CDCl<sub>3</sub>): δ 8.58 (d, *J* = 8.3 Hz, 1H), 7.72 (dd, *J* = 8.3, 1.7 Hz, 1H), 7.63-7.56 (m, 3H), 7.54-7.48 (m, 4H), 7.42-7.39 (m, 4H), 7.36-7.34 (m, 1H), 7.33-7.30 (m, 1H), 7.10-7.06 (m, 1H), 6.38 (d, *J* = 8.0 Hz, 1H), 6.09 (dd, *J* = 8.3, 3.2 Hz, 1H), 4.04 (dd, *J* = 17.7, 3.2 Hz, 1H), 2.91 (dd, *J* = 17.7, 8.3 Hz, 1H), 2.24 (s, 3H);

**<sup>13</sup>C NMR** (151 MHz, CDCl<sub>3</sub>): δ 205.9, 160.8, 145.1, 142.8, 140.5, 139.3, 138.5, 135.2, 133.4, 131.2, 131.1, 129.73, 129.68, 129.0, 128.7, 128.4, 128.1, 128.0, 127.6, 125.8, 124.1, 123.8, 123.6, 123.4, 114.8, 59.6, 45.9, 30.6 (overlapped);

**HRMS (ESI) m/z:** [M+Na]<sup>+</sup> Calcd for C<sub>31</sub>H<sub>23</sub>NNaO<sub>2</sub> 464.1621; Found 464.1614.

### 2-Fluoro-7-(2-oxopropyl)-12-phenylisoindolo[2,1-*b*]isoquinolin-5(7*H*)-one (3f)

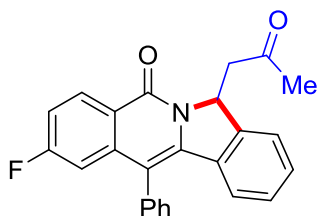



Following the general procedure, the title compound was isolated by flash chromatography (eluent: ethyl acetate/petrol ether = 1/4) as a yellow solid in 74% yield;

**M.p.** = 158-159 °C;

**<sup>1</sup>H NMR** (600 MHz, CDCl<sub>3</sub>): δ 8.48 (dd, *J* = 8.8, 5.8 Hz, 1H), 7.61-7.55 (m, 3H), 7.50 (d, *J* = 7.7 Hz, 1H), 7.43-7.40 (m, 1H), 7.35-7.28 (m, 2H), 7.16-7.12 (m, 1H), 7.08-7.05 (m, 1H), 6.80 (dd, *J* = 10.4, 2.5 Hz, 1H), 6.38 (d, *J* = 7.9 Hz, 1H), 6.02 (dd, *J* = 8.3, 3.2 Hz, 1H), 3.98 (dd, *J* = 17.7, 3.2 Hz, 1H), 2.89 (dd, *J* = 17.7, 8.3 Hz, 1H), 2.21 (s, 3H);

**<sup>13</sup>C NMR** (151 MHz, CDCl<sub>3</sub>): δ 205.7, 165.36 (d, *J* = 251.9 Hz), 160.2, 142.9, 141.35 (d, *J* = 9.9 Hz), 139.4, 134.7, 133.0, 131.1, 130.9, 130.4 (d, *J* = 10.0 Hz), 130.0, 129.8, 129.7, 128.8, 128.4, 124.2, 123.3, 121.4, 114.9 (d, *J* = 23.7 Hz), 113.9 (d, *J* = 3.4 Hz), 110.3 (d, *J* = 23.2 Hz), 59.6, 45.7, 30.5;

**HRMS (ESI) m/z:** [M+Na]<sup>+</sup> Calcd for C<sub>25</sub>H<sub>18</sub>FNNaO<sub>2</sub> 406.1214; Found 406.1214.

### 2-Chloro-7-(2-oxopropyl)-12-phenylisoindolo[2,1-*b*]isoquinolin-5(7*H*)-one (3g)

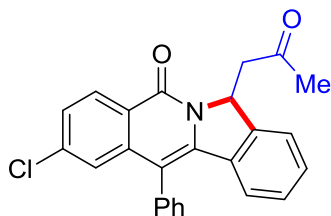

Following the general procedure, the title compound was isolated by flash chromatography (eluent: ethyl acetate/petrol ether = 1/4) as a yellow solid in 58% yield;

**M.p.** = 195-196 °C;

**<sup>1</sup>H NMR** (600 MHz, CDCl<sub>3</sub>): δ 8.43 (d, *J* = 8.5 Hz, 1H), 7.63-7.59 (m, 3H), 7.53-7.50 (m, 1H), 7.44-7.40 (m, 2H), 7.35-7.30 (m, 2H), 7.15 (d, *J* = 2.0 Hz, 1H), 7.09-7.07 (m, 1H), 6.35 (d, *J* = 8.0 Hz, 1H), 6.04 (dd, *J* = 8.2, 3.2 Hz, 1H), 3.99 (dd, *J* = 17.7, 3.2 Hz, 1H), 2.89 (dd, *J* = 17.7, 8.2 Hz, 1H), 2.22 (s, 3H);

**<sup>13</sup>C NMR** (151 MHz, CDCl<sub>3</sub>): δ 205.7, 160.4, 142.9, 140.3, 139.5, 139.0, 134.6, 133.1, 131.2, 131.0, 130.1, 129.9, 129.8, 129.2, 128.9, 128.5, 127.0, 124.6, 124.3, 123.4, 123.1, 113.7, 59.7, 45.7, 30.6;

**HRMS (ESI) m/z:** [M+Na]<sup>+</sup> Calcd for C<sub>25</sub>H<sub>18</sub>ClNNaO<sub>2</sub> 422.0918; Found 422.0919.

### 2-Bromo-7-(2-oxopropyl)-12-phenylisoindolo[2,1-*b*]isoquinolin-5(7*H*)-one (3h)

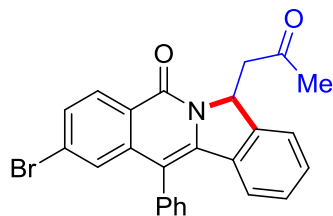

Following the general procedure, the title compound was isolated by flash chromatography (eluent: ethyl acetate/petrol ether = 1/4) as a white solid in 51% yield;

**M.p.** = 210-211 °C;

**<sup>1</sup>H NMR** (600 MHz, CDCl<sub>3</sub>): δ 8.34 (d, *J* = 8.5 Hz, 1H), 7.63-7.58 (m, 3H), 7.56 (dd, *J* = 8.5, 1.9 Hz, 1H), 7.51 (dd, *J* = 7.6, 1.1 Hz, 1H), 7.44-7.41 (m, 1H), 7.35-7.29 (m, 3H), 7.09-7.06 (m, 1H), 6.34 (d, *J* = 8.0 Hz, 1H), 6.03 (dd, *J* = 8.3, 3.1 Hz, 1H), 3.98 (dd, *J* = 17.7, 3.1 Hz, 1H), 2.89 (dd, *J* = 17.7, 8.3 Hz, 1H), 2.22 (s, 3H);

**<sup>13</sup>C NMR** (151 MHz, CDCl<sub>3</sub>): δ 205.7, 160.5, 142.9, 140.4, 139.5, 134.5, 133.1, 131.2, 131.0, 130.1, 129.9, 129.8, 129.7, 129.2, 128.9, 128.5, 127.8, 127.7, 124.2, 123.44, 123.40, 113.6, 59.7, 45.7, 30.6;

**HRMS (ESI) m/z:** [M+H]<sup>+</sup> Calcd for C<sub>25</sub>H<sub>19</sub>BrNO<sub>2</sub> 444.0594; Found 444.0593.

### 7-(2-Oxopropyl)-12-phenyl-2-(trifluoromethyl)isoindolo[2,1-*b*]isoquinolin-5(7*H*)-one (3i)

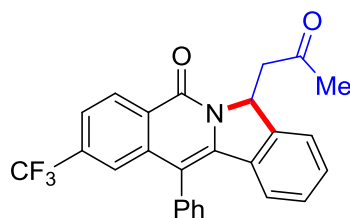

Following the general procedure, the title compound was isolated by flash chromatography (eluent: ethyl acetate/petrol ether = 1/4) as a light-yellow solid in 64% yield;

**M.p.** = 214-215 °C;

**<sup>1</sup>H NMR** (600 MHz, CDCl<sub>3</sub>): δ 8.62 (d, *J* = 8.3 Hz, 1H), 7.67 (dd, *J* = 8.4, 1.7 Hz, 1H), 7.65-7.60 (m, 3H), 7.52 (dd, *J* = 7.7, 1.1 Hz, 1H), 7.47-7.43 (m, 2H), 7.37-7.32 (m, 2H), 7.12-7.07 (m, 1H), 6.37 (d, *J* = 8.0 Hz, 1H), 6.07 (dd, *J* = 8.2, 3.2 Hz, 1H), 3.99 (dd, *J* = 17.7, 3.2 Hz, 1H), 2.93 (dd, *J* = 17.7, 8.2 Hz, 1H), 2.23 (s, 3H);

**<sup>13</sup>C NMR** (151 MHz, CDCl<sub>3</sub>): δ 205.6, 160.2, 142.8, 139.7, 139.0, 134.3, 134.0 (q, *J* = 32.4 Hz), 133.0, 131.2, 131.0, 130.2, 130.0, 129.9, 129.1, 128.6, 128.5, 126.7, 124.4, 123.8 (q, *J* = 273.3 Hz), 123.4, 122.48 (q, *J* = 4.1 Hz), 122.37 (q, *J* = 3.1 Hz), 114.3, 59.8, 45.6, 30.6;

**HRMS (ESI) m/z:**  $[M+H]^+$  Calcd for  $C_{26}H_{19}F_3NO_2$  434.1362; Found 434.1363.

**5-Oxo-7-(2-oxopropyl)-12-phenyl-5,7-dihydroisoindolo[2,1-*b*]isoquinoline-2-carbonitrile (3j)**

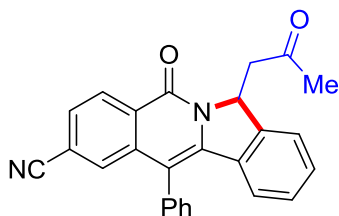

Following the general procedure, the title compound was isolated by flash chromatography (eluent: ethyl acetate/petrol ether = 1/4) as a yellow solid in 66% yield;

**M.p.** = 172-173 °C;

**<sup>1</sup>H NMR** (600 MHz,  $CDCl_3$ ):  $\delta$  8.57 (d,  $J$  = 8.2 Hz, 1H), 7.66-7.61 (m, 4H), 7.54-7.49 (m, 2H), 7.44-7.40 (m, 1H), 7.37-7.31 (m, 2H), 7.13-7.07 (m, 1H), 6.40 (d,  $J$  = 8.0 Hz, 1H), 6.04 (dd,  $J$  = 8.1, 3.0 Hz, 1H), 3.95 (dd,  $J$  = 17.8, 3.1 Hz, 1H), 2.93 (dd,  $J$  = 17.8, 8.2 Hz, 1H), 2.22 (s, 3H);

**<sup>13</sup>C NMR** (151 MHz,  $CDCl_3$ ):  $\delta$  205.5, 159.8, 142.8, 140.2, 139.0, 133.8, 132.7, 131.1, 130.9, 130.4, 130.2, 130.1, 130.0, 129.3, 128.6, 128.5, 127.9, 126.8, 124.4, 123.4, 118.5, 115.8, 113.4, 59.9, 45.4, 30.5;

**HRMS (ESI) m/z:**  $[M+H]^+$  Calcd for  $C_{26}H_{19}N_2O_2$  391.1441; Found 391.1437.

**3-Methyl-7-(2-oxopropyl)-12-phenylisoindolo[2,1-*b*]isoquinolin-5(7*H*)-one (3k)**

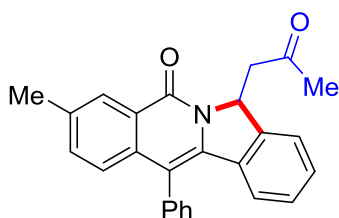

Following the general procedure, the title compound was isolated by flash chromatography (eluent: ethyl acetate/petrol ether = 1/4) as a light-yellow solid in 78% yield;

**M.p.** = 100-101 °C;

**<sup>1</sup>H NMR** (600 MHz,  $CDCl_3$ ):  $\delta$  8.31 (s, 1H), 7.60-7.55 (m, 3H), 7.50 (d,  $J$  = 7.7 Hz, 1H), 7.43 (d,  $J$  = 6.9 Hz, 1H), 7.38 (d,  $J$  = 8.3 Hz, 1H), 7.36-7.32 (m, 1H), 7.30-7.26 (m, 1H), 7.10 (d,  $J$  = 8.3 Hz, 1H),

7.08-7.04 (m, 1H), 6.37 (d,  $J = 8.0$  Hz, 1H), 6.05 (dd,  $J = 8.2, 3.2$  Hz, 1H), 4.00 (dd,  $J = 17.6, 3.2$  Hz, 1H), 2.87 (dd,  $J = 17.6, 8.2$  Hz, 1H), 2.49 (s, 3H), 2.22 (s, 3H);

$^{13}\text{C}$  NMR (151 MHz,  $\text{CDCl}_3$ ):  $\delta$  205.9, 160.9, 142.5, 137.1, 136.7, 136.5, 135.4, 133.7, 133.4, 131.1, 131.0, 129.54, 129.49, 129.4, 128.5, 128.3, 126.9, 125.3, 124.7, 123.8, 123.3, 114.7, 59.5, 46.0, 30.5, 21.4;

**HRMS (ESI) m/z:**  $[\text{M}+\text{Na}]^+$  Calcd for  $\text{C}_{26}\text{H}_{21}\text{NNaO}_2$  402.1465; Found 402.1465.

### 7-(2-Oxopropyl)-12-phenyl-3-(trifluoromethyl)isoindolo[2,1-*b*]isoquinolin-5(7*H*)-one (3l)

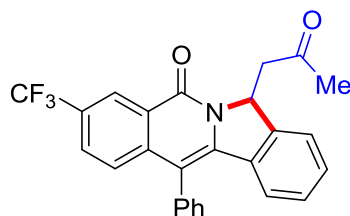

Following the general procedure, the title compound was isolated by flash chromatography (eluent: ethyl acetate/petrol ether =1/4) as a yellow solid in 66% yield;

**M.p.** = 128-129 °C;

$^1\text{H}$  NMR (600 MHz,  $\text{CDCl}_3$ ):  $\delta$  8.79 (s, 1H), 7.72 (dd,  $J = 8.6, 1.8$  Hz, 1H), 7.65-7.57 (m, 3H), 7.53 (d,  $J = 7.7$  Hz, 1H), 7.46-7.41 (m, 1H), 7.36-7.30 (m, 3H), 7.12-7.08 (m, 1H), 6.41 (d,  $J = 8.0$  Hz, 1H), 6.06 (dd,  $J = 8.1, 3.0$  Hz, 1H), 3.98 (dd,  $J = 17.7, 3.2$  Hz, 1H), 2.94 (dd,  $J = 17.7, 8.1$  Hz, 1H), 2.23 (s, 3H);

$^{13}\text{C}$  NMR (125 MHz,  $\text{CDCl}_3$ ): 205.6, 160.3, 142.9, 141.2, 140.4, 134.5, 132.9, 131.1, 131.0, 130.4, 129.9, 129.8, 129.0, 128.6, 128.23 (q,  $J = 3.2$  Hz), 128.16 (q,  $J = 33.1$  Hz), 126.2, 125.1 (q,  $J = 4.0$  Hz), 124.5, 124.4, 124.1 (q,  $J = 272.3$  Hz), 123.4, 113.9, 59.8, 45.5, 30.5;

**HRMS (ESI) m/z:**  $[\text{M}+\text{Na}]^+$  Calcd for  $\text{C}_{26}\text{H}_{18}\text{F}_3\text{NNaO}_2$  456.1182; Found 456.1187.

### 4-Methyl-7-(2-oxopropyl)-12-phenylisoindolo[2,1-*b*]isoquinolin-5(7*H*)-one (3m)

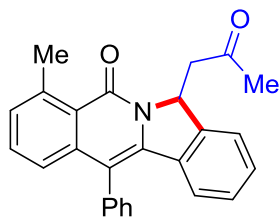

Following the general procedure, the title compound was isolated by flash chromatography (eluent: ethyl acetate/petrol ether = 1/4) as a yellow solid in 70% yield;

**M.p.** = 151-152 °C;

**<sup>1</sup>H NMR** (600 MHz, CDCl<sub>3</sub>): δ 7.61-7.55 (m, 3H), 7.50 (d, *J* = 7.6 Hz, 1H), 7.43-7.40 (m, 1H), 7.38 (dd, *J* = 8.2, 7.2 Hz, 1H), 7.33-7.31 (m, 1H), 7.30-7.27 (m, 1H), 7.23 (d, *J* = 7.2 Hz, 1H), 7.07-7.02 (m, 2H), 6.29 (d, *J* = 8.0 Hz, 1H), 6.05 (dd, *J* = 8.4, 3.0 Hz, 1H), 3.99 (dd, *J* = 17.6, 3.1 Hz, 1H), 3.02 (s, 3H), 2.83 (dd, *J* = 17.6, 8.5 Hz, 1H), 2.22 (s, 3H);

**<sup>13</sup>C NMR** (151 MHz, CDCl<sub>3</sub>): δ 206.1, 161.8, 142.9, 141.8, 140.6, 137.9, 136.0, 133.4, 131.4, 131.3, 131.2, 129.8, 129.7, 129.66, 129.59, 128.5, 128.3, 124.0, 123.8, 123.4, 123.3, 114.5, 59.7, 46.1, 30.7, 24.2;

**HRMS (ESI) m/z:** [M+Na]<sup>+</sup> Calcd for C<sub>26</sub>H<sub>21</sub>NNaO<sub>2</sub> 402.1465; Found 402.1461.

### 9-(2-Oxopropyl)-4-phenylthieno[3',2':4,5]pyrido[2,1-*a*]isoindol-11(9*H*)-one (3n)

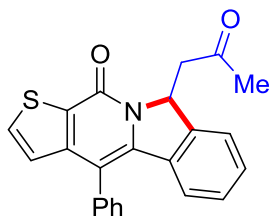

Following the general procedure, the title compound was isolated by flash chromatography (eluent: ethyl acetate/petrol ether = 1/4) as a light-yellow solid in 54% yield;

**M.p.** = 190-191 °C;

**<sup>1</sup>H NMR** (600 MHz, CDCl<sub>3</sub>): δ 7.62 (d, *J* = 5.2 Hz, 1H), 7.58-7.51 (m, 4H), 7.50-7.46 (m, 1H), 7.42-7.38 (m, 1H), 7.32-7.29 (m, 1H), 7.11-7.07 (m, 1H), 6.89 (d, *J* = 5.2 Hz, 1H), 6.63 (d, *J* = 8.0 Hz, 1H), 6.04 (dd, *J* = 8.2, 3.0 Hz, 1H), 4.07 (dd, *J* = 17.7, 3.1 Hz, 1H), 2.90 (dd, *J* = 17.7, 8.3 Hz, 1H), 2.22 (s, 3H);

**<sup>13</sup>C NMR** (125 MHz, CDCl<sub>3</sub>): δ 205.8, 157.2, 147.9, 142.7, 139.9, 135.5, 133.2, 133.0, 130.6, 130.4, 129.6, 129.5, 129.4, 128.6, 128.4, 128.1, 124.5, 123.54, 123.51, 113.7, 59.6, 45.6, 30.6;

**HRMS (ESI) m/z:** [M+Na]<sup>+</sup> Calcd for C<sub>23</sub>H<sub>17</sub>NNaO<sub>2</sub>S 394.0872; Found 394.0871.

### 9-(2-Oxopropyl)-4-phenylfuro[3',2':4,5]pyrido[2,1-*a*]isoindol-11(9*H*)-one (3o)

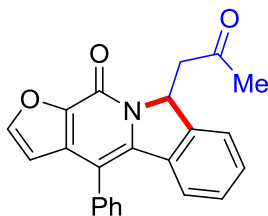

Following the general procedure, the title compound was isolated by flash chromatography (eluent: ethyl acetate/petrol ether =1/4) as a colorless solid in 58% yield;

**M.p.** = 208-209 °C;

**<sup>1</sup>H NMR** (600 MHz, CDCl<sub>3</sub>): δ 7.70 (d, *J* = 1.9 Hz, 1H), 7.57-7.46 (m, 5H), 7.43-7.39 (m, 1H), 7.32-7.24 (m, 1H), 7.11-7.06 (m, 1H), 6.80 (d, *J* = 8.0 Hz, 1H), 6.42 (d, *J* = 1.9 Hz, 1H), 6.02 (dd, *J* = 8.2, 3.0 Hz, 1H), 4.03 (dd, *J* = 17.7, 3.1 Hz, 1H), 2.90 (dd, *J* = 17.7, 8.2 Hz, 1H), 2.20 (s, 3H);

**<sup>13</sup>C NMR** (151 MHz, CDCl<sub>3</sub>): δ 205.7, 151.9, 148.5, 143.0, 141.8, 138.8, 136.0, 134.7, 132.9, 130.3, 130.0, 129.4, 129.32, 129.25, 128.6, 128.3, 123.4, 123.2, 110.9, 107.2, 59.8, 45.5, 30.5;

**HRMS (ESI) m/z:** [M+Na]<sup>+</sup> Calcd for C<sub>23</sub>H<sub>17</sub>NNaO<sub>3</sub> 378.1101; Found 378.1102.

### 3-Methyl-6-(2-oxopropyl)-1-phenylpyrido[2,1-*a*]isoindol-4(6*H*)-one (3p)

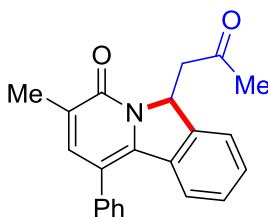

Following the general procedure, the title compound was isolated by flash chromatography (eluent: ethyl acetate/petrol ether =1/4) as a light-yellow solid in 45% yield;

**M.p.** = 170-171 °C;

**<sup>1</sup>H NMR** (600 MHz, CDCl<sub>3</sub>): δ 7.52 (d, *J* = 7.7 Hz, 1H), 7.50-7.34 (m, 5H), 7.33-7.29 (m, 1H), 7.28 (s, 1H), 7.13-7.09 (m, 1H), 6.90 (d, *J* = 8.0 Hz, 1H), 5.94 (dd, *J* = 8.1, 2.4 Hz, 1H), 4.06 (dd, *J* = 17.7, 3.0 Hz, 1H), 2.83 (dd, *J* = 17.7, 8.3 Hz, 1H), 2.23 (s, 3H), 2.21 (s, 3H);

**<sup>13</sup>C NMR** (151 MHz, CDCl<sub>3</sub>): δ 205.7, 161.6, 142.8, 141.2, 141.0, 137.4, 133.1, 129.84, 129.76, 129.6, 129.1, 129.0, 128.3, 128.2, 126.9, 123.5, 123.3, 116.9, 60.3, 45.0, 30.5, 16.5;

**HRMS (ESI) m/z:** [M+Na]<sup>+</sup> Calcd for C<sub>22</sub>H<sub>19</sub>NNaO<sub>2</sub> 352.1308; Found 352.1308.

### 9-Methyl-7-(2-oxopropyl)-12-(*p*-tolyl)isoindolo[2,1-*b*]isoquinolin-5(7*H*)-one (3q)

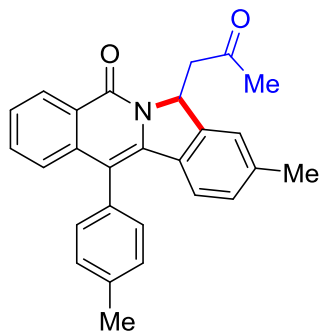

Following the general procedure, the title compound was isolated by flash chromatography (eluent: ethyl acetate/petrol ether = 1/4) as a yellow solid in 80% yield;

**M.p.** = 222-223 °C;

**<sup>1</sup>H NMR** (600 MHz, CDCl<sub>3</sub>): δ 8.49 (d, *J* = 7.4, 1H), 7.55-7.51 (m, 1H), 7.47-7.43 (m, 1H), 7.40-7.36 (m, 2H), 7.32-7.29 (m, 2H), 7.21 (d, *J* = 7.8 Hz, 2H), 6.91 (d, *J* = 8.1 Hz, 1H), 6.34 (d, *J* = 8.1 Hz, 1H), 6.01 (dd, *J* = 8.2, 2.8 Hz, 1H), 4.01 (dd, *J* = 17.7, 3.0 Hz, 1H), 2.85 (dd, *J* = 17.7, 8.3 Hz, 1H), 2.52 (s, 3H), 2.33 (s, 3H), 2.23 (s, 3H);

**<sup>13</sup>C NMR** (151 MHz, CDCl<sub>3</sub>): δ 206.0, 161.0, 142.9, 140.1, 139.1, 138.21, 138.17, 132.2, 132.1, 131.0, 130.9, 130.8, 130.3, 130.2, 129.4, 127.2, 126.1, 125.2, 124.6, 123.82, 123.77, 113.9, 59.4, 46.0, 30.5, 21.7, 21.6;

**HRMS (ESI) m/z:** [M+Na]<sup>+</sup> Calcd for C<sub>27</sub>H<sub>23</sub>NNaO<sub>2</sub> 416.1621; Found 416.1626.

**9-Methoxy-12-(4-methoxyphenyl)-7-(2-oxopropyl)isoindolo[2,1-*b*]isoquinolin-5(7*H*)-one (3r)**

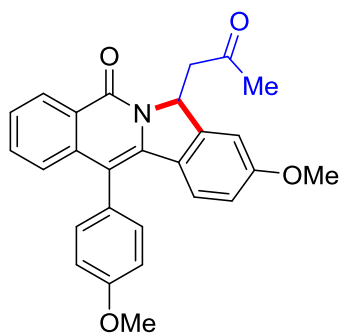

Following the general procedure, the title compound was isolated by flash chromatography (eluent: ethyl acetate/petrol ether = 1/2) as a yellow solid in 77% yield;

**M.p.** = 173-174 °C;

**<sup>1</sup>H NMR** (600 MHz, CDCl<sub>3</sub>): δ 8.47 (dd, *J* = 8.0, 0.9 Hz, 1H), 7.56-7.52 (m, 1H), 7.46-7.42 (m, 1H), 7.35-7.31 (m, 1H), 7.26-7.23 (m, 1H), 7.21 (d, *J* = 8.0 Hz, 1H), 7.13-7.09 (m, 2H), 7.04 (d, *J* = 2.3 Hz, 1H), 6.65 (dd, *J* = 8.7, 2.4 Hz, 1H), 6.38 (d, *J* = 8.7 Hz, 1H), 6.00 (dd, *J* = 8.4, 3.0 Hz, 1H), 4.03 (dd, *J* = 17.8, 3.1 Hz, 1H), 3.94 (s, 3H), 3.78 (s, 3H), 2.83 (dd, *J* = 17.8, 8.4 Hz, 1H), 2.23 (s, 3H);

**<sup>13</sup>C NMR** (151 MHz, CDCl<sub>3</sub>): δ 206.1, 161.1, 161.0, 159.7, 144.8, 139.4, 138.4, 132.4, 132.3, 132.2, 127.5, 127.3, 126.1, 125.9, 125.3, 125.0, 124.3, 115.3, 115.00, 114.97, 112.6, 108.2, 59.4, 55.7, 55.5, 46.0, 30.6;

**HRMS (ESI) m/z:** [M+Na]<sup>+</sup> Calcd for C<sub>27</sub>H<sub>23</sub>NNaO<sub>4</sub> 448.1519; Found 448.1516.

### 9-Fluoro-12-(4-fluorophenyl)-7-(2-oxopropyl)isoindolo[2,1-*b*]isoquinolin-5(7*H*)-one (3s)

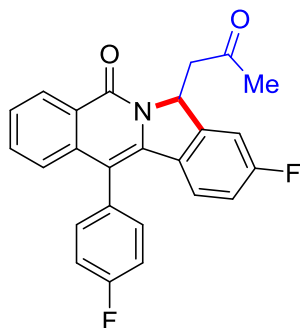

Following the general procedure, the title compound was isolated by flash chromatography (eluent: ethyl acetate/petrol ether = 1/4) as a yellow solid in 67% yield;

**M.p.** =185-186 °C;

**<sup>1</sup>H NMR** (600 MHz, CDCl<sub>3</sub>): δ 8.47 (d, *J* = 8.0 Hz, 1H), 7.59-7.55 (m, 1H), 7.50-7.49 (m, 1H), 7.43-7.39 (m, 1H), 7.35-7.28 (m, 3H), 7.24 (d, *J* = 8.4 Hz, 1H), 7.15 (d, *J* = 8.1 Hz, 1H), 6.83-6.79 (m, 1H), 6.36 (dd, *J* = 8.7, 5.0 Hz, 1H), 6.02-5.97 (m, 1H), 4.05 (dd, *J* = 18.0, 2.4 Hz, 1H), 2.86 (dd, *J* = 18.0, 8.6 Hz, 1H), 2.22 (s, 3H);

**<sup>13</sup>C NMR** (151 MHz, CDCl<sub>3</sub>): δ 205.7, 163.6 (d, *J* = 251.0 Hz), 163.0 (d, *J* = 248.5 Hz), 160.8, 145.1 (d, *J* = 9.3 Hz), 138.7, 137.6, 132.99 (d, *J* = 7.9 Hz), 132.89 (d, *J* = 8.0 Hz), 132.4, 130.96 (d, *J* = 3.4 Hz), 129.30 (d, *J* = 2.4 Hz), 127.4, 126.6, 125.5 (d, *J* = 8.9 Hz), 125.0, 124.5, 116.9 (d, *J* = 15.4 Hz), 116.8 (d, *J* = 15.3 Hz), 116.06 (d, *J* = 23.0 Hz), 112.9 (d, *J* = 1.6 Hz), 111.15 (d, *J* = 24.5 Hz), 59.3 (d, *J* = 2.5 Hz), 45.5, 30.5;

**HRMS (ESI) m/z:** [M+Na]<sup>+</sup> Calcd for C<sub>25</sub>H<sub>17</sub>F<sub>2</sub>NNaO<sub>2</sub> 424.1120; Found 424.1120.

### 9-Chloro-12-(4-chlorophenyl)-7-(2-oxopropyl)isoindolo[2,1-*b*]isoquinolin-5(7*H*)-one (3t)



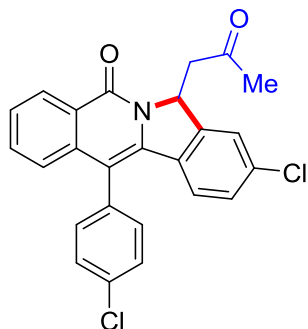

Following the general procedure, the title compound was isolated by flash chromatography (eluent: ethyl acetate/petrol ether = 1/4) as a yellow solid in 68% yield;

**M.p.** = 194-195 °C;

**<sup>1</sup>H NMR** (600 MHz, CDCl<sub>3</sub>): δ 8.49 (dd, *J* = 8.0, 1.4 Hz, 1H), 7.60-7.56 (m, 3H), 7.54 (s, 1H), 7.52-7.48 (m, 1H), 7.40-7.37 (m, 1H), 7.31-7.28 (m, 1H), 7.15 (d, *J* = 8.1 Hz, 1H), 7.10 (dd, *J* = 8.5, 1.9 Hz, 1H), 6.36 (d, *J* = 8.4 Hz, 1H), 6.01 (dd, *J* = 8.5, 2.9 Hz, 1H), 4.03 (dd, *J* = 18.1, 2.9 Hz, 1H), 2.90 (dd, *J* = 18.1, 8.5 Hz, 1H), 2.23 (s, 3H);

**<sup>13</sup>C NMR** (151 MHz, CDCl<sub>3</sub>): δ 205.7, 160.8, 144.4, 138.4, 137.4, 136.0, 134.9, 133.5, 132.6, 132.55, 132.52, 131.7, 130.1, 130.0, 129.0, 127.5, 126.9, 125.1, 124.9, 124.8, 124.0, 113.4, 59.3, 45.5, 30.5;

**HRMS (ESI) m/z:** [M+H]<sup>+</sup> Calcd for C<sub>25</sub>H<sub>18</sub>Cl<sub>2</sub>NO<sub>2</sub> 434.0709; Found 434.0712.

**7-(2-oxopropyl)-9-(trifluoromethyl)-12-(4-(trifluoromethyl)phenyl)isoindolo[2,1-*b*]isoquinolin-5(7*H*)-one (3u)**

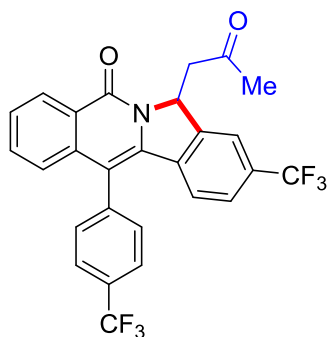

Following the general procedure, the title compound was isolated by flash chromatography (eluent: ethyl acetate/petrol ether = 1/4) as a yellow solid in 63% yield;

**M.p.** = 205-206 °C;

**<sup>1</sup>H NMR** (600 MHz, CDCl<sub>3</sub>): δ 8.47 (dd, *J* = 8.0, 1.0 Hz, 1H), 7.94-7.86 (m, 2H), 7.78 (s, 1H), 7.65-7.55 (m, 3H), 7.52-7.47 (m, 1H), 7.38 (d, *J* = 8.3 Hz, 1H), 7.13 (d, *J* = 8.1 Hz, 1H), 6.45 (d, *J* = 8.3 Hz,

1H), 6.01 (dd,  $J = 8.2, 2.8$  Hz, 1H), 4.01 (dd,  $J = 18.1, 3.0$  Hz, 1H), 2.99 (dd,  $J = 18.1, 8.2$  Hz, 1H), 2.22 (s, 3H);

$^{13}\text{C NMR}$  (151 MHz,  $\text{CDCl}_3$ ):  $\delta$  205.5, 160.6, 143.3, 138.9, 137.9, 136.9, 136.4, 132.7, 131.73, 131.66, 131.7 (q,  $J = 31.7$  Hz), 131.3 (q,  $J = 33.2$  Hz), 127.5, 127.4, 126.8 (q,  $J = 3.0$  Hz), 126.7 (q,  $J = 4.5$  Hz), 125.7 (q,  $J = 3.5$  Hz), 125.22, 125.11, 124.1 (q,  $J = 273.3$  Hz), 123.9, 123.7 (q,  $J = 271.8$  Hz), 120.7 (q,  $J = 3.7$  Hz), 114.5, 59.5, 45.2, 30.4;

**HRMS (ESI) m/z:**  $[\text{M}+\text{H}]^+$  Calcd for  $\text{C}_{27}\text{H}_{18}\text{F}_6\text{NO}_2$  502.1236; Found 502.1238.

### 7-(2-Oxopropyl)isoindolo[2,1-*b*]isoquinolin-5(7*H*)-one (3v)

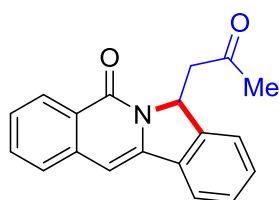

Following the general procedure, the title compound was isolated by flash chromatography (eluent: ethyl acetate/petrol ether = 1/2) as a brown solid in 61% yield;

**M.p.** = 150-151 °C;

$^1\text{H NMR}$  (600 MHz,  $\text{CDCl}_3$ ):  $\delta$  8.42 (dd,  $J = 8.0, 1.3$  Hz, 1H), 7.74 (dd,  $J = 7.3, 1.3$  Hz, 1H), 7.66-7.63 (m, 1H), 7.60 (dd,  $J = 8.0, 1.3$  Hz, 1H), 7.55 (dd,  $J = 7.5, 1.3$  Hz, 1H), 7.47-7.40 (m, 3H), 6.98 (s, 1H), 5.99 (dd,  $J = 8.6, 3.2$  Hz, 1H), 4.01 (dd,  $J = 17.8, 3.2$  Hz, 1H), 2.82 (dd,  $J = 17.8, 8.6$  Hz, 1H), 2.19 (s, 3H);

$^{13}\text{C NMR}$  (151 MHz,  $\text{CDCl}_3$ ):  $\delta$  205.9, 161.3, 142.2, 141.9, 137.9, 133.1, 132.4, 130.3, 128.8, 127.5, 126.5, 126.4, 125.4, 123.9, 120.9, 98.2, 60.1, 45.4, 30.5;

**HRMS (ESI) m/z:**  $[\text{M}+\text{Na}]^+$  Calcd for  $\text{C}_{19}\text{H}_{15}\text{NNaO}_2$  312.0995; Found 312.0996.

### 12-Methyl-7-(2-oxopropyl)isoindolo[2,1-*b*]isoquinolin-5(7*H*)-one (3w)

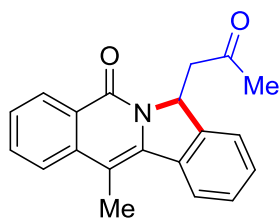

Following the general procedure, the title compound was isolated by flash chromatography (eluent: ethyl acetate/petrol ether = 1/4) as a light-yellow solid in 70% yield;

**M.p.** = 150-151 °C;

**<sup>1</sup>H NMR** (600 MHz, CDCl<sub>3</sub>): δ 8.47 (d, *J* = 7.9 Hz, 1H), 7.99 (d, *J* = 7.9 Hz, 1H), 7.82 (d, *J* = 8.2 Hz, 1H), 7.73-7.69 (m, 1H), 7.55 (d, *J* = 7.6 Hz, 1H), 7.50-7.44 (m, 2H), 7.42-7.38 (m, 1H), 5.97 (dd, *J* = 8.1, 2.6 Hz, 1H), 3.91 (dd, *J* = 17.6, 3.0 Hz, 1H), 2.81 (dd, *J* = 17.6, 8.2 Hz, 1H), 2.68 (s, 3H), 2.18 (s, 3H);

**<sup>13</sup>C NMR** (151 MHz, CDCl<sub>3</sub>): δ 205.9, 160.6, 142.8, 138.6, 137.8, 134.2, 132.3, 129.3, 128.7, 127.6, 126.3, 125.1, 124.4, 123.7, 123.3, 108.2, 59.3, 46.0, 30.5, 12.6;

**HRMS (ESI) m/z:** [M+Na]<sup>+</sup> Calcd for C<sub>20</sub>H<sub>17</sub>NNaO<sub>2</sub> 326.1151; Found 326.1151.

### 7-(2-Oxobutyl)-12-phenylisoindolo[2,1-*b*]isoquinolin-5(7*H*)-one (3y)

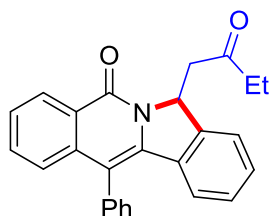

Following the general procedure, the title compound was isolated by flash chromatography (eluent: ethyl acetate/petrol ether =1/4) as a yellow solid in 45% yield;

**M.p.** = 132-133 °C;

**<sup>1</sup>H NMR** (600 MHz, CDCl<sub>3</sub>): δ 8.52 (d, *J* = 8.0 Hz, 1H), 7.63-7.54 (m, 4H), 7.52-7.47 (m, 2H), 7.47-7.43 (m, 1H), 7.37-7.34 (m, 1H), 7.32-7.28 (m, 1H), 7.20 (d, *J* = 8.2 Hz, 1H), 7.09-7.05 (m, 1H), 6.38 (d, *J* = 8.0 Hz, 1H), 6.10 (dd, *J* = 8.3, 3.0 Hz, 1H), 4.01 (dd, *J* = 17.5, 3.1 Hz, 1H), 2.86 (dd, *J* = 17.5, 8.4 Hz, 1H), 2.57 (dq, *J* = 17.6, 7.3 Hz, 1H), 2.41 (dq, *J* = 17.6, 7.3 Hz, 1H), 1.10 (t, *J* = 7.3 Hz, 3H);

**<sup>13</sup>C NMR** (151 MHz, CDCl<sub>3</sub>): δ 208.7, 161.0, 142.8, 138.9, 138.1, 135.3, 133.4, 132.2, 131.3, 131.1, 129.7, 129.65, 129.59, 128.6, 128.3, 127.4, 126.5, 125.4, 124.8, 124.0, 123.4, 114.7, 59.7, 44.7, 36.5, 7.9;

**HRMS (ESI) m/z:** [M+H]<sup>+</sup> Calcd for C<sub>26</sub>H<sub>22</sub>NO<sub>2</sub> 380.1645; Found 380.1645.

### 7-(2-Cyclopropyl-2-oxoethyl)-12-phenylisoindolo[2,1-*b*]isoquinolin-5(7*H*)-one (3z)

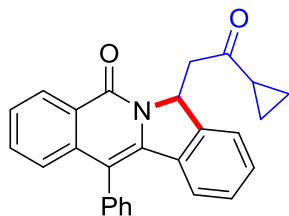

Following the general procedure, the title compound was isolated by flash chromatography (eluent: ethyl acetate/petrol ether =1/4) as a yellow solid in 68% yield;

**M.p.** = 161-162 °C;

**<sup>1</sup>H NMR** (600 MHz, CDCl<sub>3</sub>): δ 8.53 (dd, *J* = 8.0, 1.0 Hz, 1H), 7.62-7.54 (m, 4H), 7.51-7.47 (m, 2H), 7.46-7.43 (m, 1H), 7.37-7.33 (m, 1H), 7.31-7.27 (m, 1H), 7.20 (d, *J* = 7.9 Hz, 1H), 7.08-7.04 (m, 1H), 6.38 (d, *J* = 8.0 Hz, 1H), 6.11 (dd, *J* = 8.8, 2.6 Hz, 1H), 4.21 (dd, *J* = 17.1, 2.8 Hz, 1H), 3.03 (dd, *J* = 17.1, 8.9 Hz, 1H), 1.95 (tt, *J* = 7.9, 4.5 Hz, 1H), 1.14-1.10 (m, 1H), 1.07-1.02 (m, 1H), 0.93-0.87 (m, 1H), 0.86-0.81 (m, 1H);

**<sup>13</sup>C NMR** (151 MHz, CDCl<sub>3</sub>): δ 208.0, 161.0, 142.7, 138.8, 138.1, 135.3, 133.3, 132.2, 131.2, 131.1, 129.63, 129.61, 129.57, 128.6, 128.3, 127.4, 126.4, 125.3, 124.9, 124.0, 123.6, 114.6, 59.7, 45.4, 21.2, 11.23, 11.15;

**HRMS (ESI)** calcd for C<sub>27</sub>H<sub>22</sub>NO<sub>2</sub>: [M+H]<sup>+</sup> 392.1645, found: 392.1642.

### 7-(2-Cyclohexyl-2-oxoethyl)-12-phenylisoindolo[2,1-*b*]isoquinolin-5(7*H*)-one (3aa)

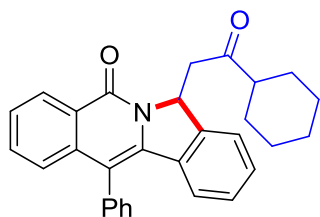

Following the general procedure, the title compound was isolated by flash chromatography (eluent: ethyl acetate/petrol ether =1/4) as a yellow solid in 65% yield;

**M.p.** = 153-154 °C;

**<sup>1</sup>H NMR** (600 MHz, CDCl<sub>3</sub>): δ 8.54 (dd, *J* = 8.0, 1.0 Hz, 1H), 7.63-7.55 (m, 4H), 7.51-7.46 (m, 3H), 7.39-7.35 (m, 1H), 7.32-7.28 (m, 1H), 7.22 (d, *J* = 8.1 Hz, 1H), 7.09-7.06 (m, 1H), 6.40 (d, *J* = 8.0 Hz, 1H), 6.12 (dd, *J* = 8.9, 2.7 Hz, 1H), 4.14 (dd, *J* = 17.7, 2.9 Hz, 1H), 2.87 (dd, *J* = 17.7, 8.9 Hz, 1H), 2.40 (ddd, *J* = 11.5, 8.0, 3.4 Hz, 1H), 1.96-1.91 (m, 1H), 1.86-1.74 (m, 3H), 1.69-1.63 (m, 1H), 1.43 (ddd, *J* = 15.5, 12.4, 3.5 Hz, 1H), 1.35 (ddd, *J* = 15.1, 12.3, 3.4 Hz, 1H), 1.30-1.18 (m, 3H);

<sup>13</sup>C NMR (151 MHz, CDCl<sub>3</sub>): δ 211.4, 160.8, 143.0, 138.8, 138.1, 135.3, 133.3, 132.1, 131.2, 131.1, 129.6, 129.5, 128.5, 128.2, 127.3, 126.4, 125.3, 124.8, 124.0, 123.4, 114.5, 59.7, 51.2, 43.0, 28.5, 28.3, 25.9, 25.7, 25.6 (overlapped);

**HRMS (ESI) m/z:** [M+H]<sup>+</sup> Calcd for C<sub>30</sub>H<sub>28</sub>NO<sub>2</sub> 434.2115; Found 434.2119.

### 7-(2-Oxo-2-phenylethyl)-12-phenylisoindolo[2,1-*b*]isoquinolin-5(7*H*)-one (3ab)

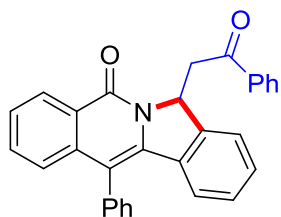

Following the general procedure, the title compound was isolated by flash chromatography (eluent: ethyl acetate/petrol ether =1/4) as a yellow solid in 83% yield;

**M.p.** = 183-184 °C;

<sup>1</sup>H NMR (600 MHz, CDCl<sub>3</sub>): δ 8.54 (d, *J* = 7.7 Hz, 1H), 8.03 (d, *J* = 7.4 Hz, 2H), 7.62-7.52 (m, 6H), 7.52-7.48 (m, 1H), 7.48-7.43 (m, 3H), 7.37 (d, *J* = 7.1 Hz, 1H), 7.29-7.26 (m, 1H), 7.22 (d, *J* = 8.1 Hz, 1H), 7.09-7.05 (m, 1H), 6.40 (d, *J* = 8.0 Hz, 1H), 6.31 (dd, *J* = 9.0, 2.3 Hz, 1H), 4.70 (dd, *J* = 17.0, 2.7 Hz, 1H), 3.34 (dd, *J* = 17.0, 9.1 Hz, 1H);

<sup>13</sup>C NMR (151 MHz, CDCl<sub>3</sub>): δ 197.7, 161.0, 142.6, 138.9, 138.1, 136.8, 135.3, 133.5, 133.4, 132.3, 131.3, 131.1, 129.65, 129.63, 129.61, 128.8, 128.6, 128.40, 128.37, 127.4, 126.5, 125.4, 124.9, 124.0, 123.8, 114.7, 60.1, 41.5;

**HRMS (ESI) m/z:** [M+H]<sup>+</sup> Calcd for C<sub>30</sub>H<sub>22</sub>NO<sub>2</sub> 428.1645; Found 428.1649.

### 7-(2-Oxo-2-(*p*-tolyl)ethyl)-12-phenylisoindolo[2,1-*b*]isoquinolin-5(7*H*)-one (3ac)

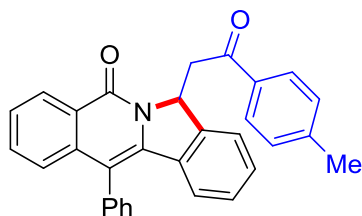

Following the general procedure, the title compound was isolated by flash chromatography (eluent: ethyl acetate/petrol ether =1/4) as a yellow solid in 75% yield;

**M.p.** = 210-211 °C;

**<sup>1</sup>H NMR** (600 MHz, CDCl<sub>3</sub>): δ 8.54 (dd, *J* = 7.9, 0.7 Hz, 1H), 7.93 (d, *J* = 8.2 Hz, 2H), 7.63-7.56 (m, 4H), 7.53 (d, *J* = 7.7 Hz, 1H), 7.51-7.48 (m, 1H), 7.47-7.45 (m, 1H), 7.38-7.36 (m, 1H), 7.28-7.26 (m, 1H), 7.24 (d, *J* = 8.4 Hz, 2H), 7.22 (d, *J* = 8.0 Hz, 1H), 7.07-7.05 (m, 1H), 6.39 (d, *J* = 8.0 Hz, 1H), 6.31 (dd, *J* = 9.1, 2.3 Hz, 1H), 4.68 (dd, *J* = 16.9, 2.8 Hz, 1H), 3.29 (dd, *J* = 16.9, 9.2 Hz, 1H), 2.39 (s, 3H);

**<sup>13</sup>C NMR** (151 MHz, CDCl<sub>3</sub>): δ 197.3, 161.0, 144.3, 142.7, 138.9, 138.2, 135.4, 134.4, 133.4, 132.2, 131.3, 131.1, 129.64, 129.60, 129.4, 128.6, 128.5, 128.4, 127.4, 126.5, 125.4, 124.9, 124.0, 123.9, 114.7, 60.2, 41.4, 21.8 (overlapped);

**HRMS (ESI) m/z:** [M+H]<sup>+</sup> Calcd for C<sub>31</sub>H<sub>24</sub>NO<sub>2</sub> 442.1802; Found 442.1804.

**7-(2-(4-Chlorophenyl)-2-oxoethyl)-12-phenylisoindolo[2,1-*b*]isoquinolin-5(7*H*)-one (3ad)**

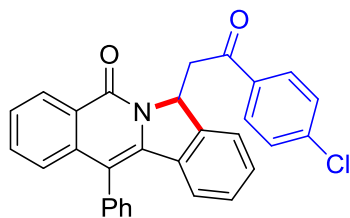

Following the general procedure, the title compound was isolated by flash chromatography (eluent: ethyl acetate/petrol ether =1/4) as a yellow solid in 72% yield;

**M.p.** = 189-190 °C;

**<sup>1</sup>H NMR** (600 MHz, CDCl<sub>3</sub>): δ 8.52 (d, *J* = 7.6 Hz, 1H), 7.97 (d, *J* = 8.6 Hz, 2H), 7.63-7.56 (m, 4H), 7.52-7.48 (m, 2H), 7.46 (d, *J* = 6.8 Hz, 1H), 7.42 (d, *J* = 8.5 Hz, 2H), 7.38-7.35 (m, 1H), 7.28 (dd, *J* = 7.5, 7.5 Hz, 1H), 7.22 (d, *J* = 8.1 Hz, 1H), 7.07 (dd, *J* = 7.7, 7.6 Hz, 1H), 6.40 (d, *J* = 8.0 Hz, 1H), 6.26 (dd, *J* = 8.8, 2.4 Hz, 1H), 4.64 (dd, *J* = 16.9, 2.8 Hz, 1H), 3.31 (dd, *J* = 16.9, 8.9 Hz, 1H);

**<sup>13</sup>C NMR** (151 MHz, CDCl<sub>3</sub>): δ 196.5, 161.0, 142.4, 139.9, 138.9, 138.0, 135.3, 135.1, 133.4, 132.3, 131.2, 131.1, 129.8, 129.7, 129.65, 129.61, 129.1, 128.6, 128.5, 127.4, 126.6, 125.4, 124.8, 124.1, 123.7, 114.8, 60.0, 41.5;

**HRMS (ESI) m/z:** [M+H]<sup>+</sup> Calcd for C<sub>30</sub>H<sub>21</sub>ClNO<sub>2</sub> 462.1255; Found 462.1258.

**7-(2-(4-Bromophenyl)-2-oxoethyl)-12-phenylisoindolo[2,1-*b*]isoquinolin-5(7*H*)-one (3ae)**

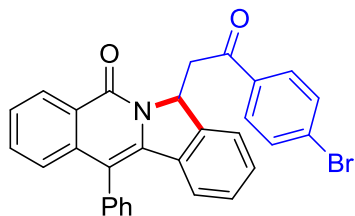

Following the general procedure, the title compound was isolated by flash chromatography (eluent: ethyl acetate/petrol ether =1/4) as a yellow solid in 70% yield;

**M.p.** = 122-123 °C;

**<sup>1</sup>H NMR** (600 MHz, CDCl<sub>3</sub>): δ 8.52 (d, *J* = 7.9 Hz, 1H), 7.88 (d, *J* = 8.6 Hz, 2H), 7.64-7.54 (m, 6H), 7.52-7.48 (m, 2H), 7.47-7.44 (m, 1H), 7.38-7.35 (m, 1H), 7.30-7.25 (m, 1H), 7.22 (d, *J* = 8.1 Hz, 1H), 7.09-7.05 (m, 1H), 6.40 (d, *J* = 8.0 Hz, 1H), 6.25 (dd, *J* = 8.8, 2.6 Hz, 1H), 4.63 (dd, *J* = 16.9, 2.9 Hz, 1H), 3.31 (dd, *J* = 16.9, 8.9 Hz, 1H);

**<sup>13</sup>C NMR** (151 MHz, CDCl<sub>3</sub>): δ 196.6, 161.0, 142.4, 138.8, 138.0, 135.5, 135.2, 133.4, 132.3, 132.0, 131.2, 131.0, 129.8, 129.623, 129.616, 129.58, 128.65, 128.60, 128.4, 127.3, 126.5, 125.4, 124.8, 124.0, 123.6, 114.7, 59.9, 41.4;

**HRMS (ESI) m/z:** [M+H]<sup>+</sup> Calcd for C<sub>30</sub>H<sub>21</sub>BrNO<sub>2</sub> 506.0750; Found 506.0754.

#### 4-(2-(5-Oxo-12-phenyl-5,7-dihydroisoindolo[2,1-*b*]isoquinolin-7-yl)acetyl)benzonitrile (3af)

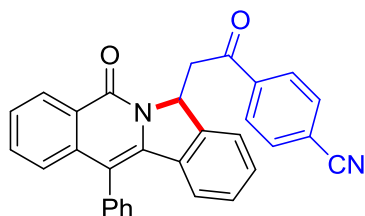

Following the general procedure, the title compound was isolated by flash chromatography (eluent: ethyl acetate/petrol ether =1/4) as a yellow solid in 66% yield;

**M.p.** = 144-145 °C;

**<sup>1</sup>H NMR** (600 MHz, CDCl<sub>3</sub>): δ 8.50 (d, *J* = 7.9 Hz, 1H), 8.10 (d, *J* = 8.4 Hz, 2H), 7.75 (d, *J* = 8.4 Hz, 2H), 7.65-7.56 (m, 4H), 7.53-7.48 (m, 2H), 7.44 (d, *J* = 6.9 Hz, 1H), 7.39-7.34 (m, 1H), 7.32-7.28 (m, 1H), 7.22 (d, *J* = 8.1 Hz, 1H), 7.11-7.07 (m, 1H), 6.40 (d, *J* = 8.0 Hz, 1H), 6.24 (dd, *J* = 8.3, 2.8 Hz, 1H), 4.60 (dd, *J* = 17.0, 3.1 Hz, 1H), 3.41 (dd, *J* = 17.0, 8.4 Hz, 1H);

<sup>13</sup>C NMR (151 MHz, CDCl<sub>3</sub>): δ 196.4, 161.1, 142.1, 139.7, 138.8, 137.9, 135.1, 133.5, 132.6, 132.4, 131.14, 131.05, 129.72, 129.70, 129.6, 128.8, 128.7, 128.6, 127.3, 126.7, 125.4, 124.8, 124.1, 123.5, 118.0, 116.6, 115.0, 59.8, 41.9;

**HRMS (ESI) m/z:** [M+H]<sup>+</sup> Calcd for C<sub>31</sub>H<sub>21</sub>N<sub>2</sub>O<sub>2</sub> 453.1598; Found 453.1594.

**Methyl 4-(2-(5-oxo-12-phenyl-5,7-dihydroisoindolo[2,1-*b*]isoquinolin-7-yl)acetyl)benzoate (3ag)**

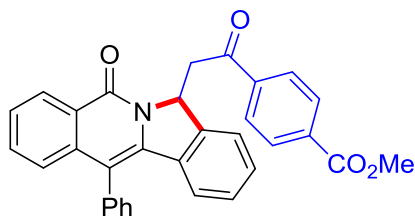

Following the general procedure, the title compound was isolated by flash chromatography (eluent: ethyl acetate/petrol ether =1/4) as a yellow solid in 70% yield;

**M.p.** = 189-190 °C;

<sup>1</sup>H NMR (600 MHz, CDCl<sub>3</sub>): δ 8.51 (dd, *J* = 8.0, 1.0 Hz, 1H), 8.13-8.08 (m, 2H), 8.08-8.03 (m, 2H), 7.63-7.56 (m, 4H), 7.53 (dd, *J* = 7.7, 0.5 Hz, 1H), 7.51-7.48 (m, 1H), 7.46 (dd, *J* = 6.5, 1.2 Hz, 1H), 7.39-7.34 (m, 1H), 7.30-7.27 (m, 1H), 7.22 (d, *J* = 8.1 Hz, 1H), 7.09-7.06 (m, 1H), 6.40 (d, *J* = 8.0 Hz, 1H), 6.29 (dd, *J* = 8.7, 2.7 Hz, 1H), 4.67 (dd, *J* = 17.2, 2.9 Hz, 1H), 3.93 (s, 3H), 3.40 (dd, *J* = 17.2, 8.8 Hz, 1H);

<sup>13</sup>C NMR (151 MHz, CDCl<sub>3</sub>): δ 197.2, 166.2, 161.0, 142.4, 139.9, 138.8, 138.0, 135.2, 134.1, 133.4, 132.3, 131.2, 131.1, 129.9, 129.7, 129.65, 129.60, 128.6, 128.5, 128.2, 127.3, 126.5, 125.4, 124.8, 124.1, 123.6, 114.8, 59.9, 52.6, 41.9;

**HRMS (ESI) m/z:** [M+H]<sup>+</sup> Calcd for C<sub>32</sub>H<sub>24</sub>NO<sub>4</sub> 486.1700; Found 486.1703.

**7-(2-Oxo-2-(thiophen-2-yl)ethyl)-12-phenylisoindolo[2,1-*b*]isoquinolin-5(7*H*)-one (3ah)**

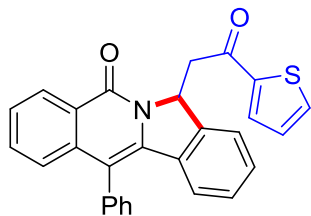



Following the general procedure, the title compound was isolated by flash chromatography (eluent: ethyl acetate/petrol ether =1/4) as a yellow solid in 68% yield;

**M.p.** = 176-177 °C;

**<sup>1</sup>H NMR** (600 MHz, CDCl<sub>3</sub>): δ 8.54 (dd, *J* = 8.0, 0.9 Hz, 1H), 7.88 (dd, *J* = 3.8, 1.0 Hz, 1H), 7.63 (dd, *J* = 4.9, 1.0 Hz, 1H), 7.62-7.53 (m, 5H), 7.50-7.45 (m, 2H), 7.38-7.35 (m, 1H), 7.30-7.25 (m, 1H), 7.22 (d, *J* = 8.0 Hz, 1H), 7.10 (dd, *J* = 4.9, 3.9 Hz, 1H), 7.08-7.04 (m, 1H), 6.40 (d, *J* = 8.0 Hz, 1H), 6.23 (dd, *J* = 9.0, 2.8 Hz, 1H), 4.64 (dd, *J* = 16.3, 2.9 Hz, 1H), 3.26 (dd, *J* = 16.3, 9.1 Hz, 1H);

**<sup>13</sup>C NMR** (151 MHz, CDCl<sub>3</sub>): δ 190.2, 161.0, 144.0, 142.2, 138.8, 138.0, 135.2, 134.1, 133.3, 132.9, 132.2, 131.2, 131.0, 129.59, 129.56, 128.6, 128.41, 128.38, 127.3, 126.5, 125.3, 124.8, 124.0, 123.7, 114.7, 60.1, 41.8 (overlapped);

**HRMS (ESI) m/z:** [M+H]<sup>+</sup> Calcd for C<sub>28</sub>H<sub>20</sub>NO<sub>2</sub>S 434.1209; Found 434.1211.

### 3-(2-(3-Oxobutyl)phenyl)-4-phenylisoquinolin-1(2H)-one (4)

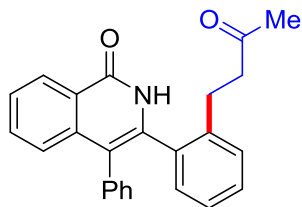

Following the general procedure using [Ru(*p*-cymene)Cl<sub>2</sub>]<sub>2</sub> as a catalyst, the title compound was isolated by flash chromatography (eluent: ethyl acetate/petrol ether = 1/2) as a white solid in 83% yield;

**M.p.** = 207-208 °C;

**<sup>1</sup>H NMR** (600 MHz, CDCl<sub>3</sub>): δ 10.22 (s, 1H), 8.41 (dd, *J* = 7.9, 0.8 Hz, 1H), 7.59-7.56 (m, 1H), 7.50-7.46 (m, 1H), 7.34 (d, *J* = 8.0 Hz, 1H), 7.26-7.18 (m, 4H), 7.18-7.13 (m, 2H), 7.12-7.06 (m, 3H), 2.88-2.76 (m, 2H), 2.69-2.62 (m, 1H), 2.57-2.49 (m, 1H), 2.02 (s, 3H);

**<sup>13</sup>C NMR** (151 MHz, CDCl<sub>3</sub>): δ 208.0, 162.7, 139.4, 138.5, 137.3, 135.6, 134.2, 132.7, 131.8, 131.2, 131.0, 129.3, 128.2, 127.6, 127.2, 126.7, 126.0, 125.6, 125.4, 118.2, 43.9, 30.0, 26.2;

## 6. Copies of NMR spectra

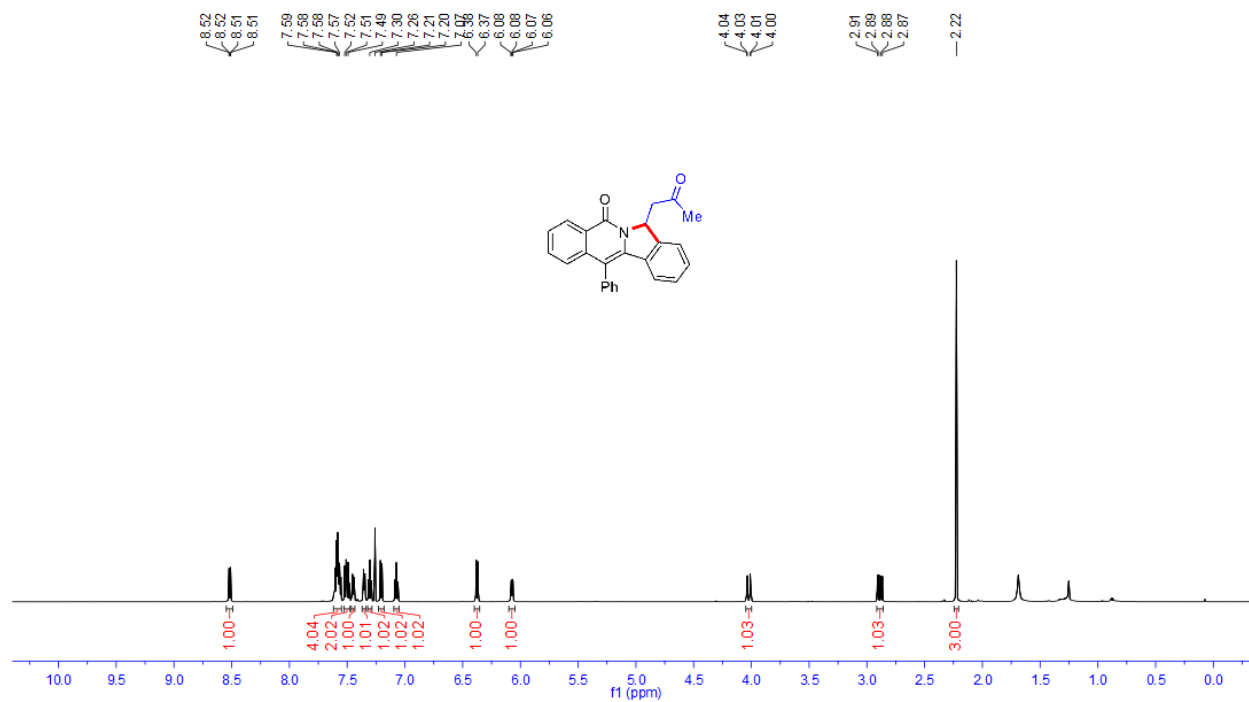

<sup>1</sup>H NMR spectrum of **3a** (CDCl<sub>3</sub>, 600 MHz)

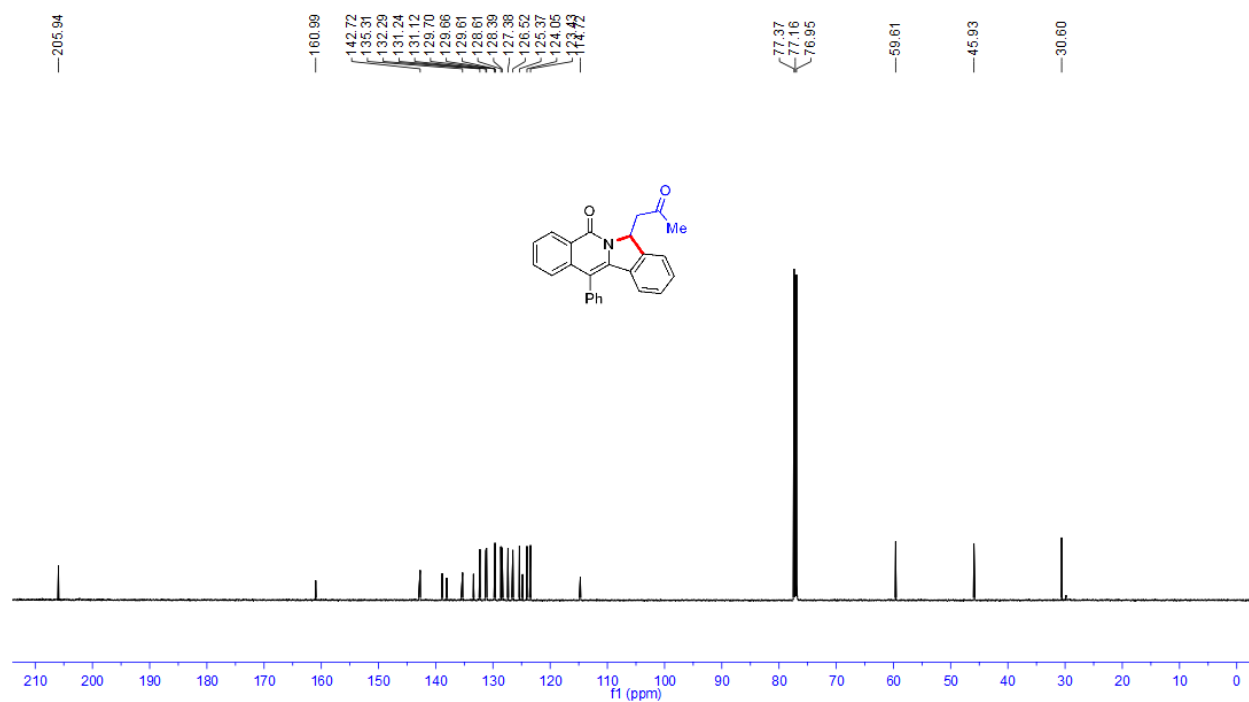

<sup>13</sup>C NMR spectrum of **3a** (CDCl<sub>3</sub>, 151 MHz)

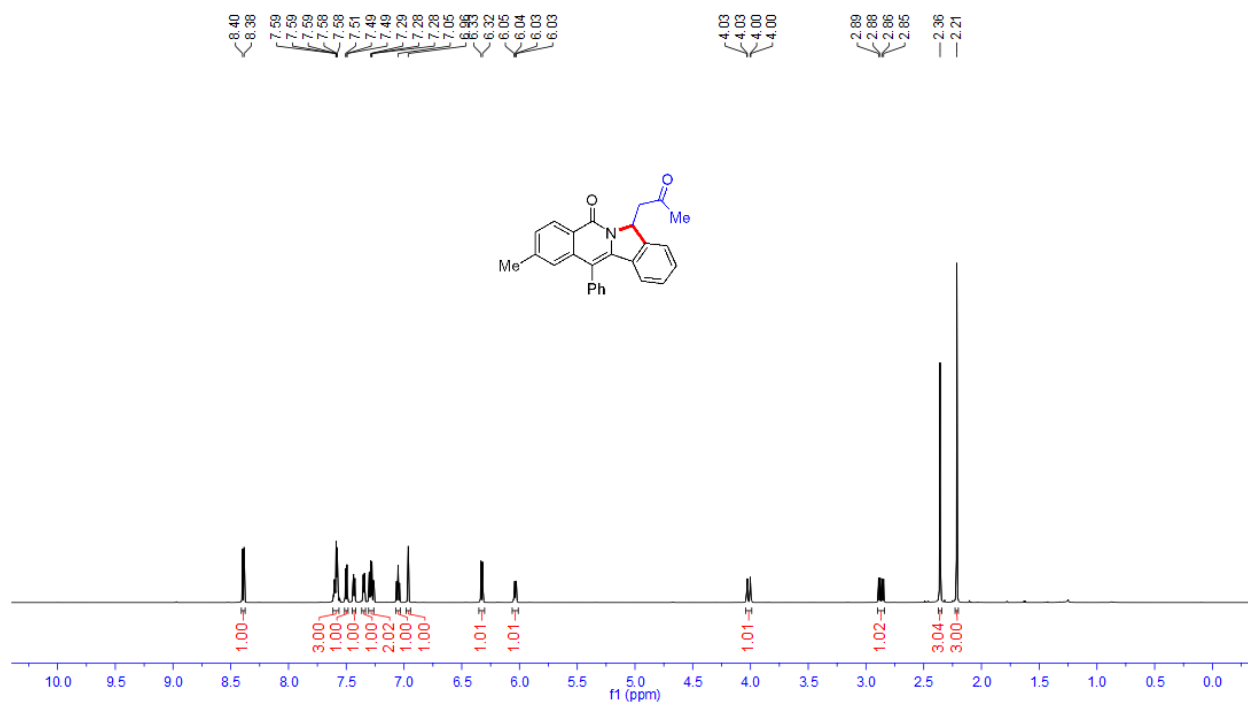

$^1\text{H}$  NMR spectrum of **3b** ( $\text{CDCl}_3$ , 600 MHz)

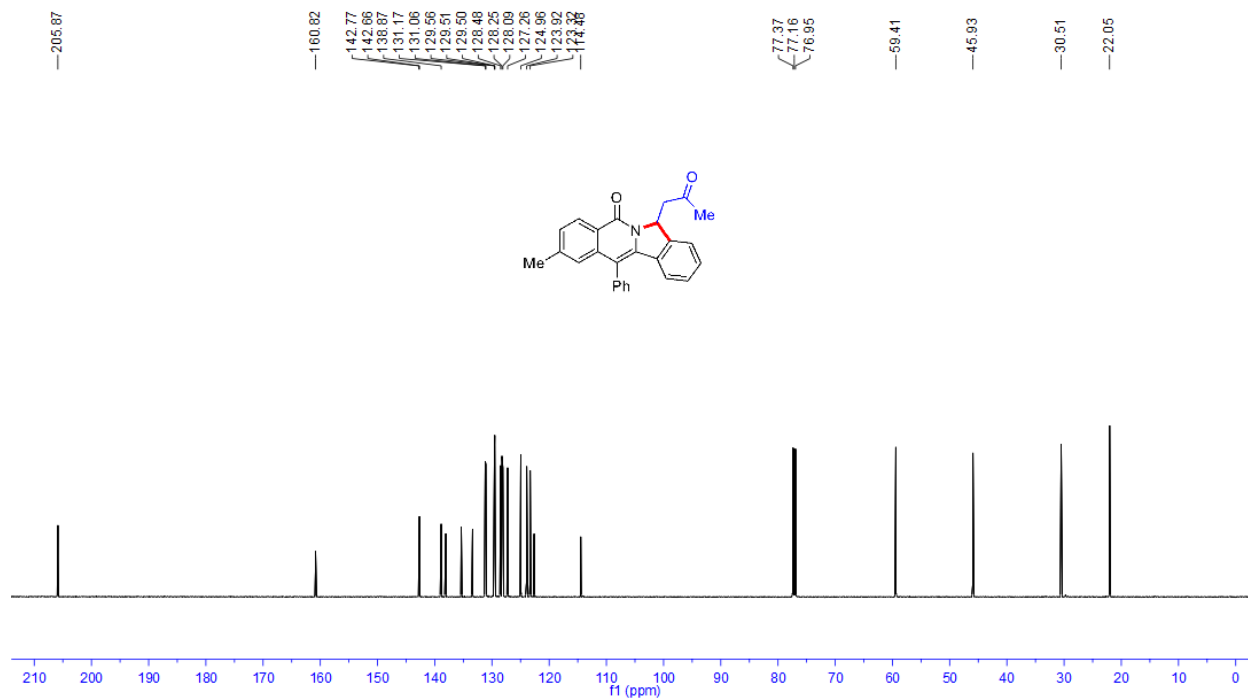

$^{13}\text{C}$  NMR spectrum of **3b** ( $\text{CDCl}_3$ , 151 MHz)



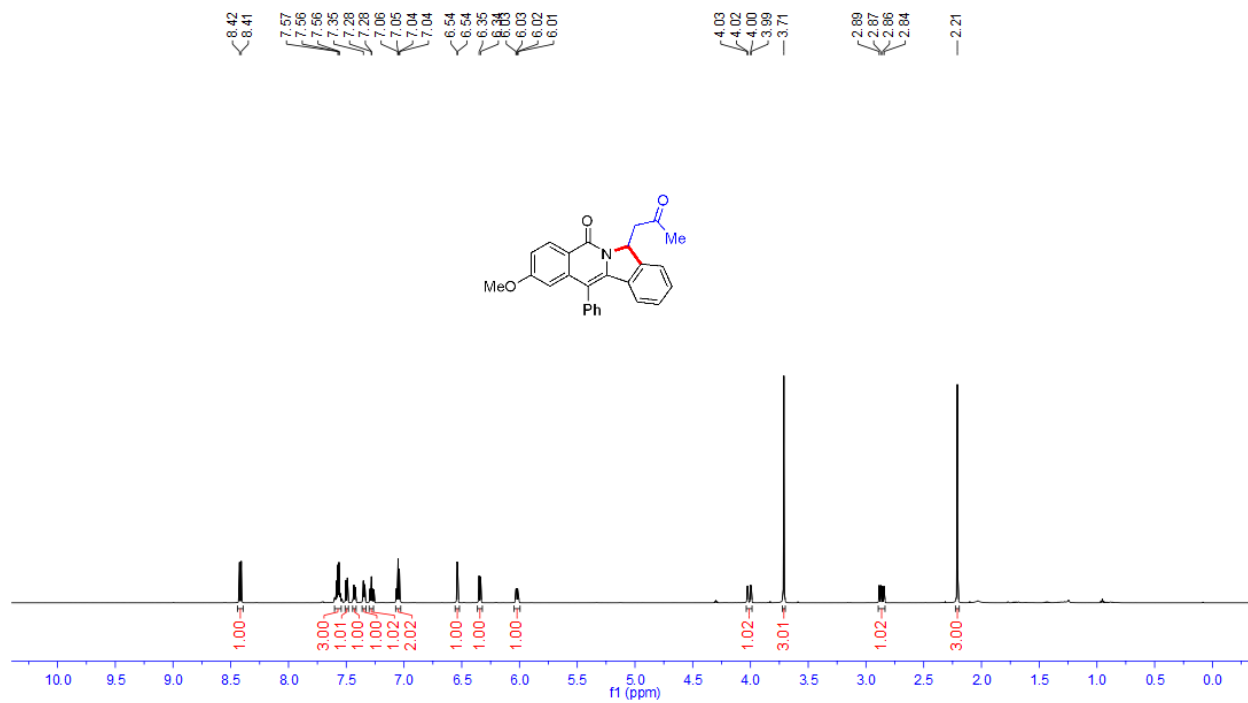

<sup>1</sup>H NMR spectrum of **3d** (CDCl<sub>3</sub>, 600 MHz)

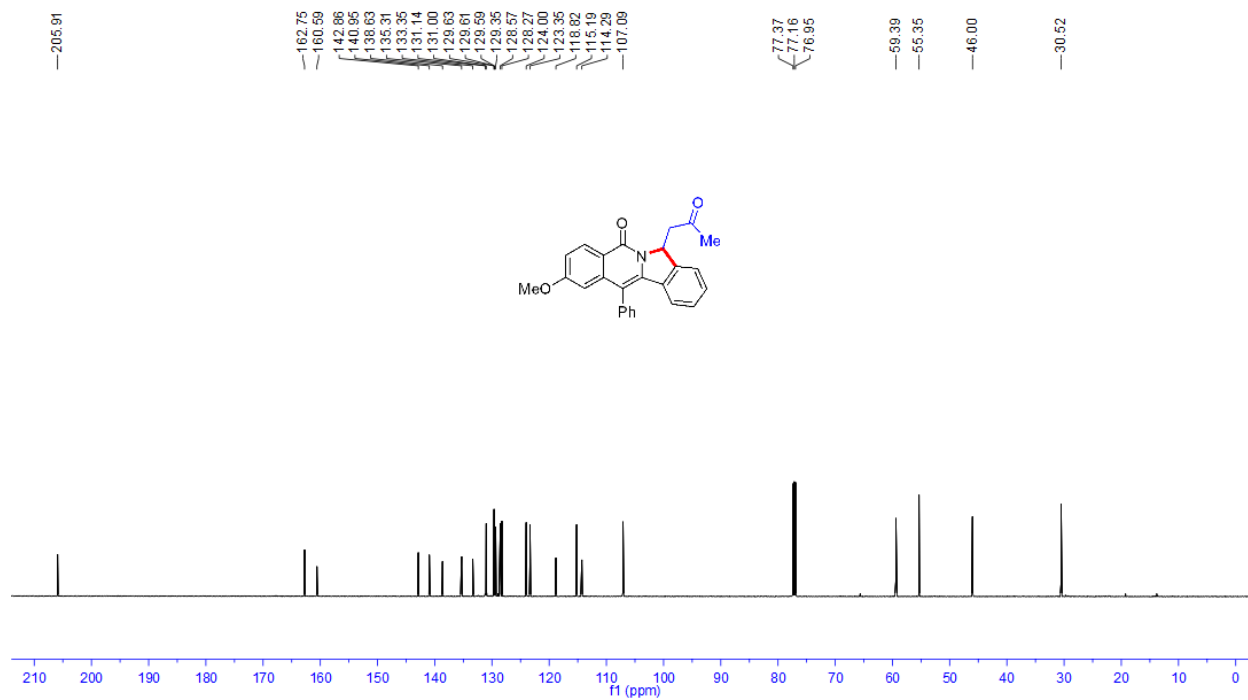

<sup>13</sup>C NMR spectrum of **3d** (CDCl<sub>3</sub>, 151 MHz)

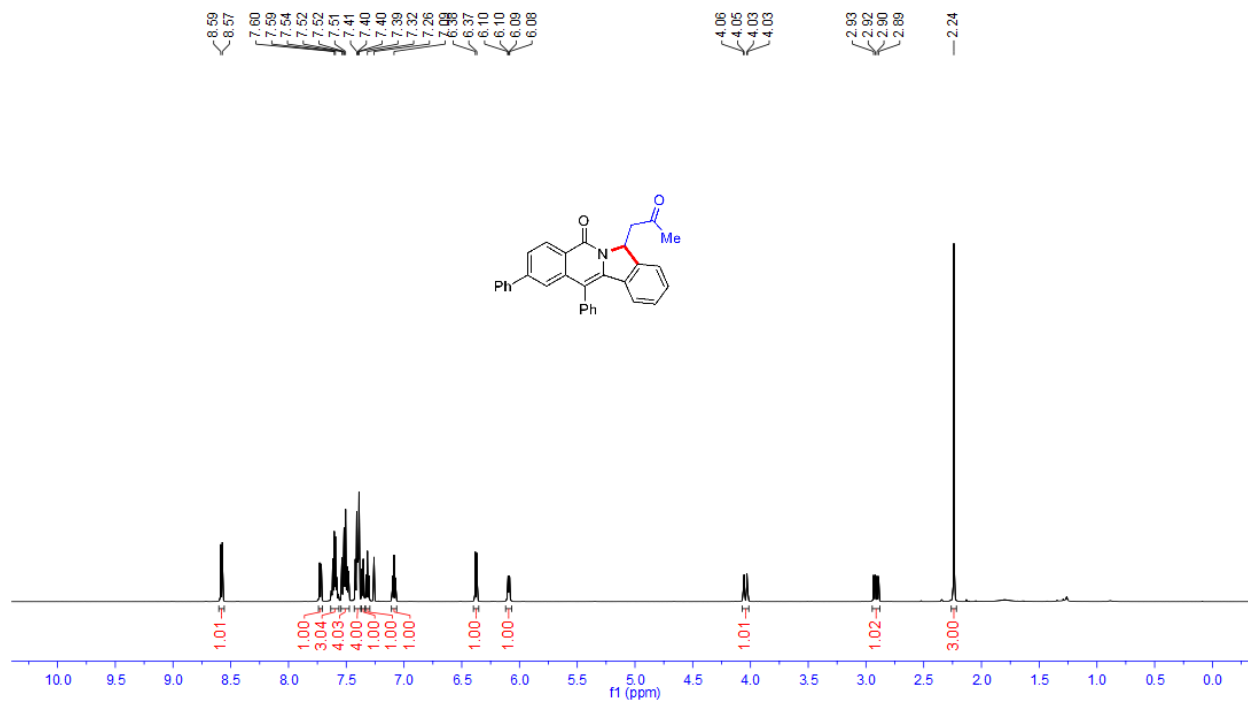

<sup>1</sup>H NMR spectrum of **3e** (CDCl<sub>3</sub>, 600 MHz)

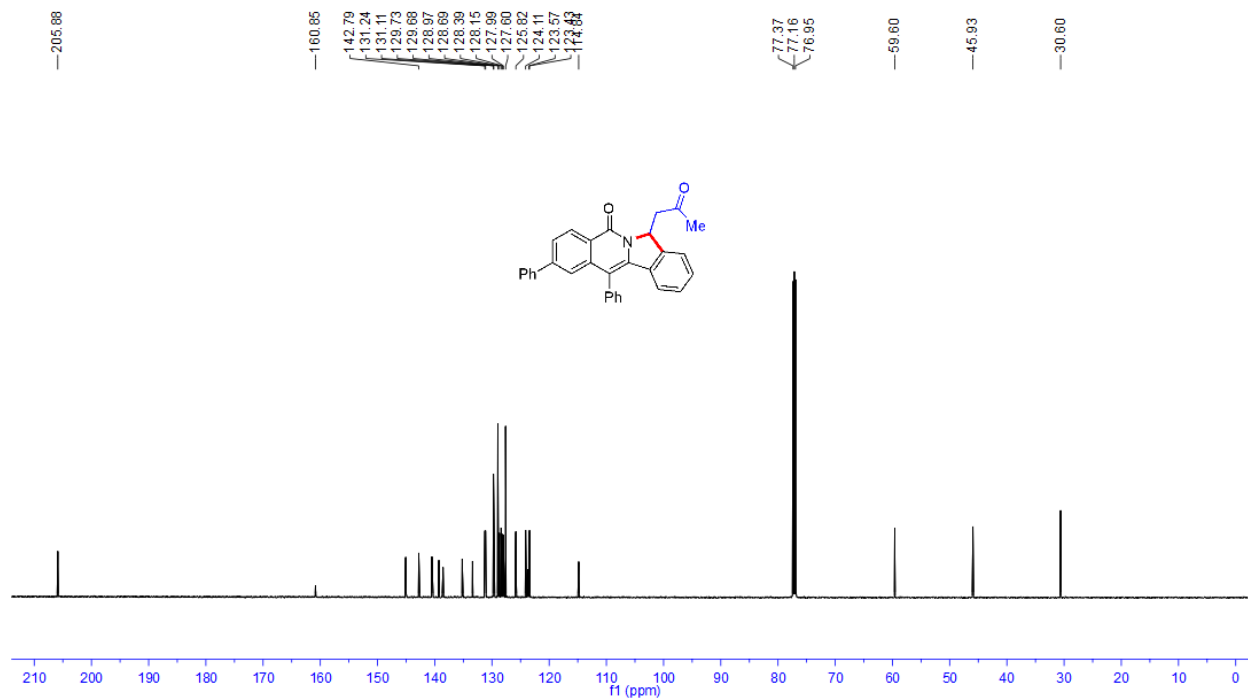

<sup>13</sup>C NMR spectrum of **3e** (CDCl<sub>3</sub>, 151 MHz)

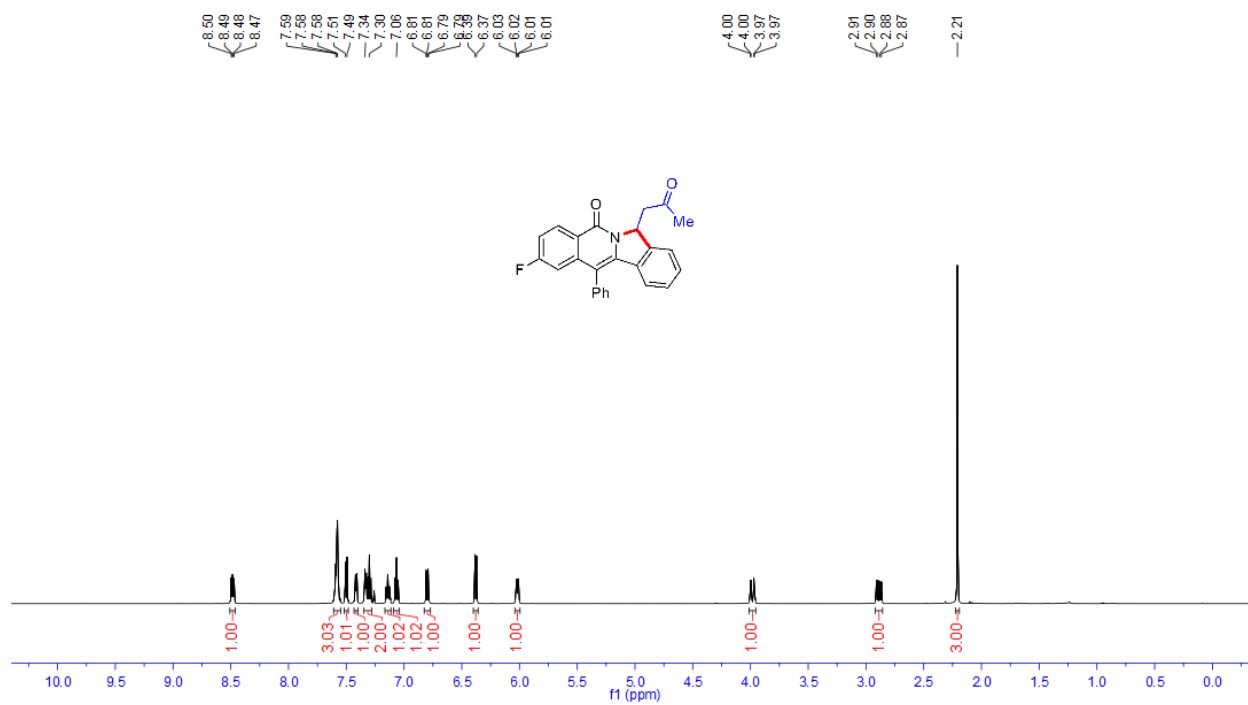

$^1\text{H}$  NMR spectrum of **3f** ( $\text{CDCl}_3$ , 600 MHz)

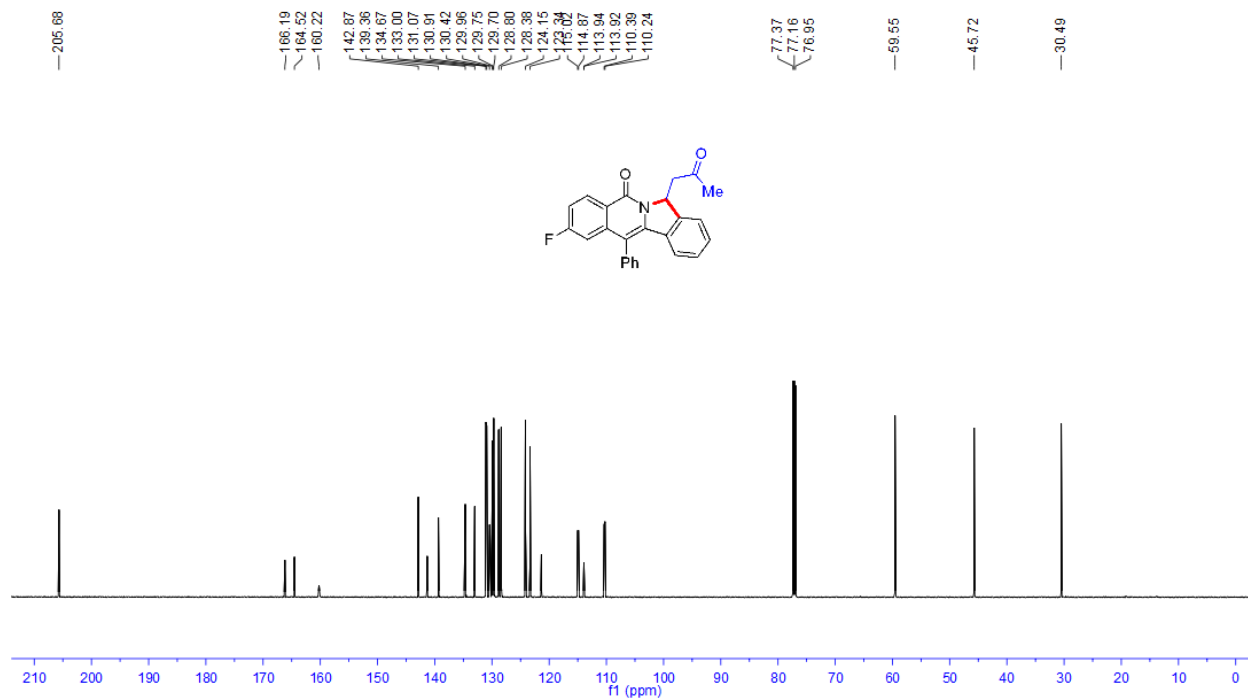

$^{13}\text{C}$  NMR spectrum of **3f** ( $\text{CDCl}_3$ , 151 MHz)

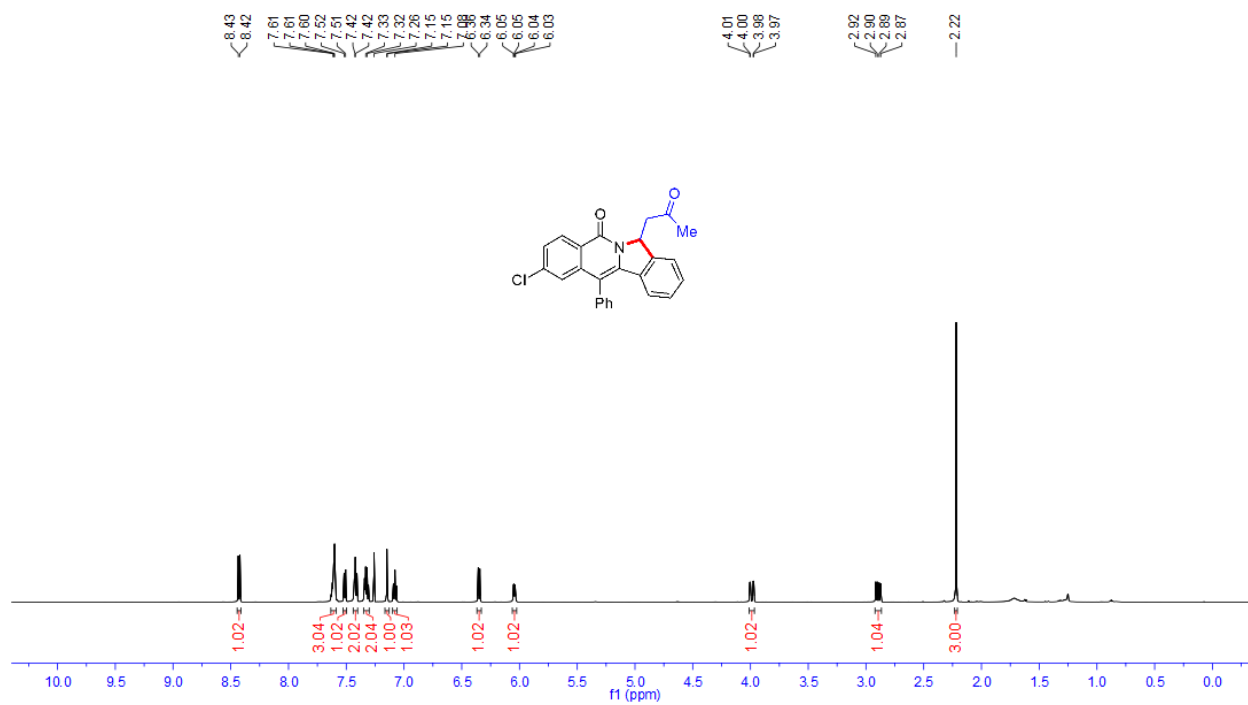

<sup>1</sup>H NMR spectrum of **3g** (CDCl<sub>3</sub>, 600 MHz)

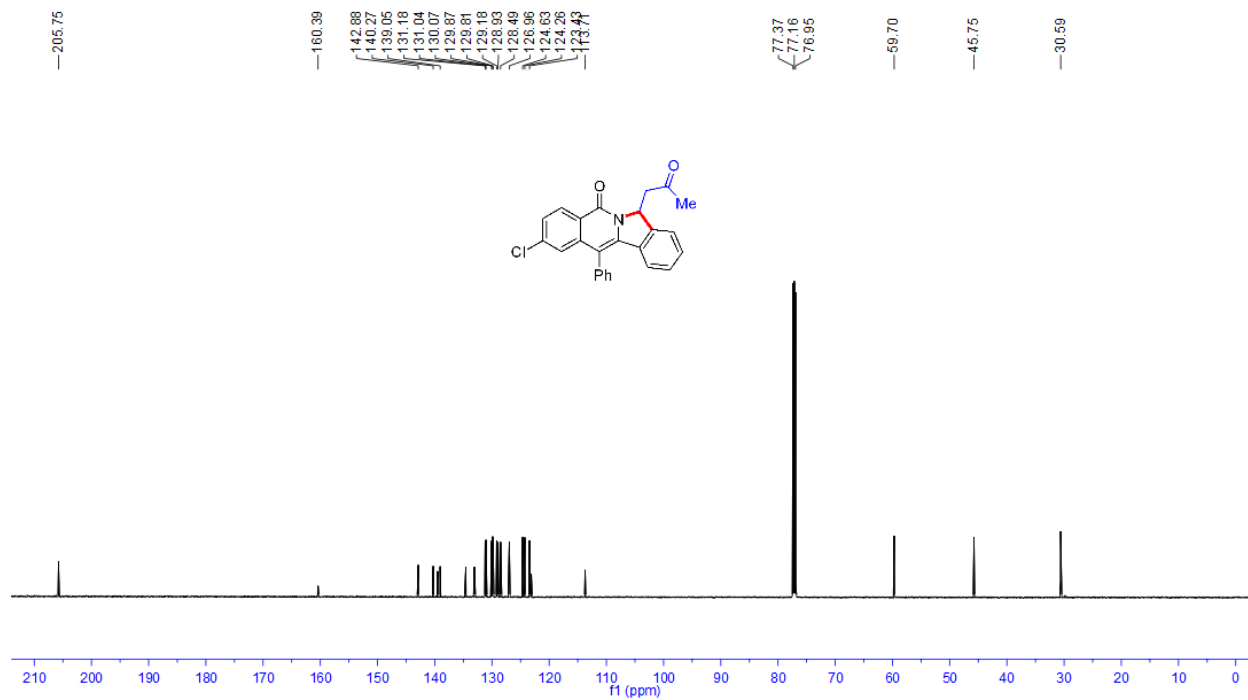

<sup>13</sup>C NMR spectrum of **3g** (CDCl<sub>3</sub>, 151 MHz)



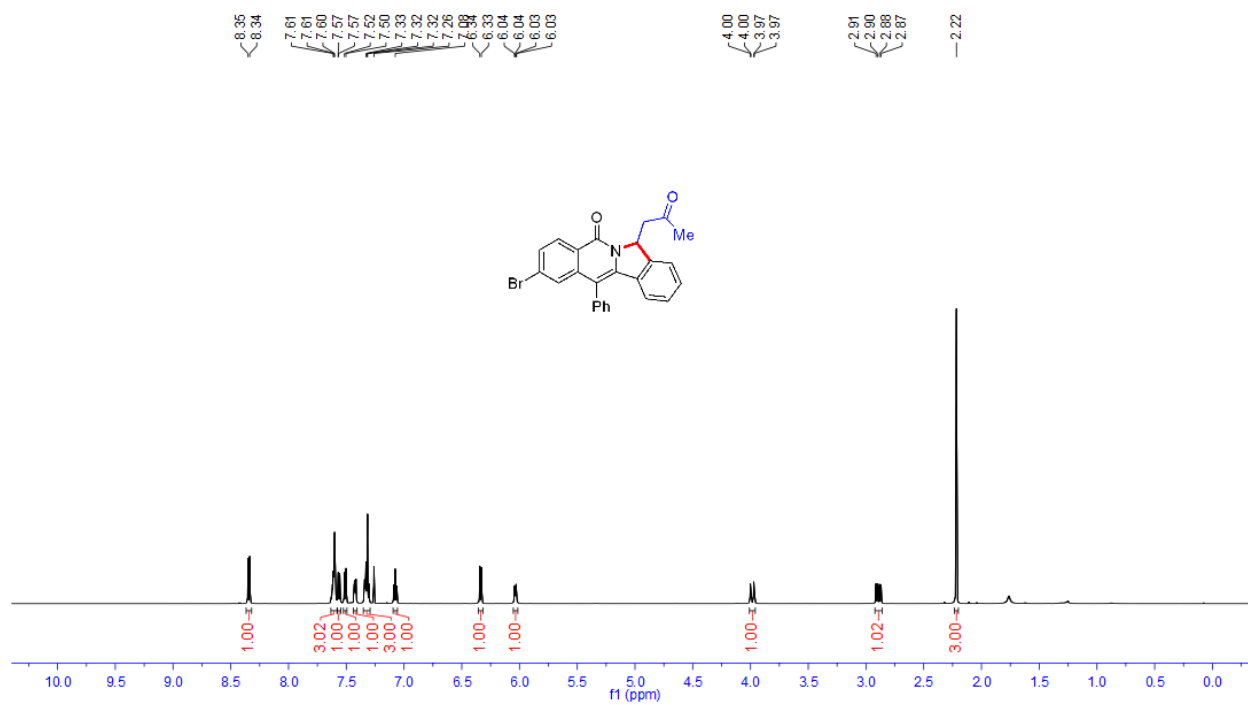

<sup>1</sup>H NMR spectrum of **3h** (CDCl<sub>3</sub>, 600 MHz)

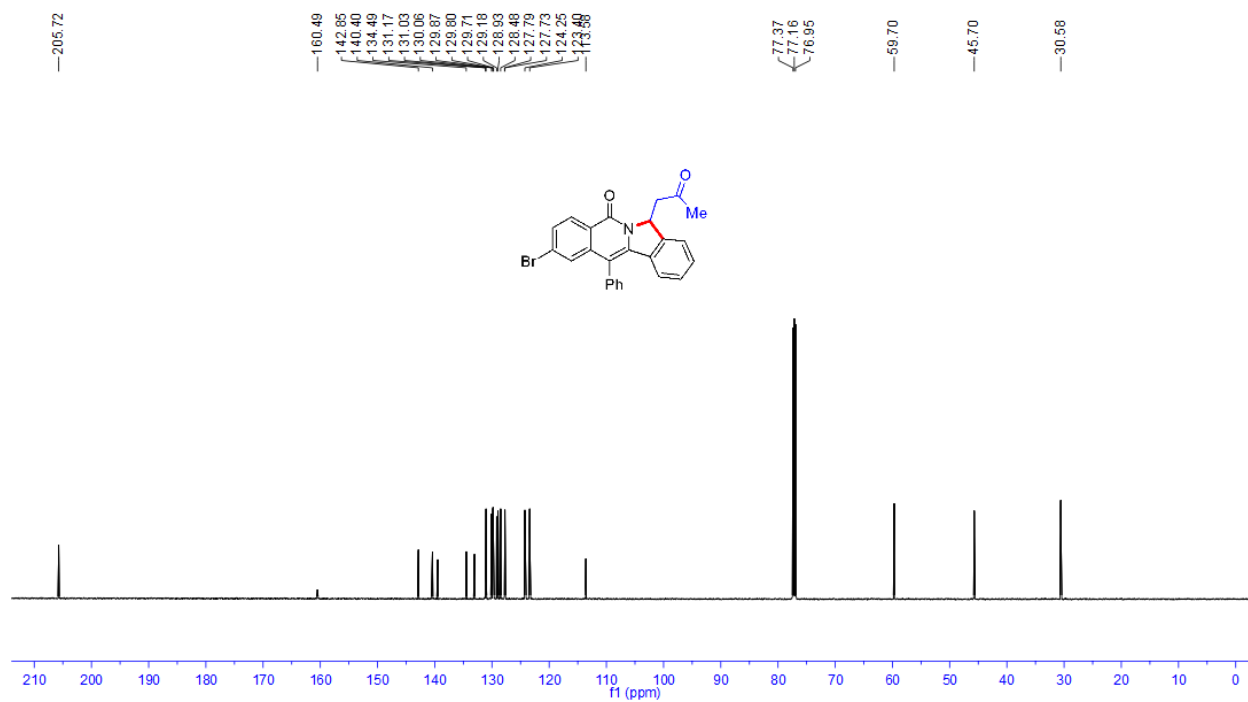

<sup>13</sup>C NMR spectrum of **3h** (CDCl<sub>3</sub>, 151 MHz)

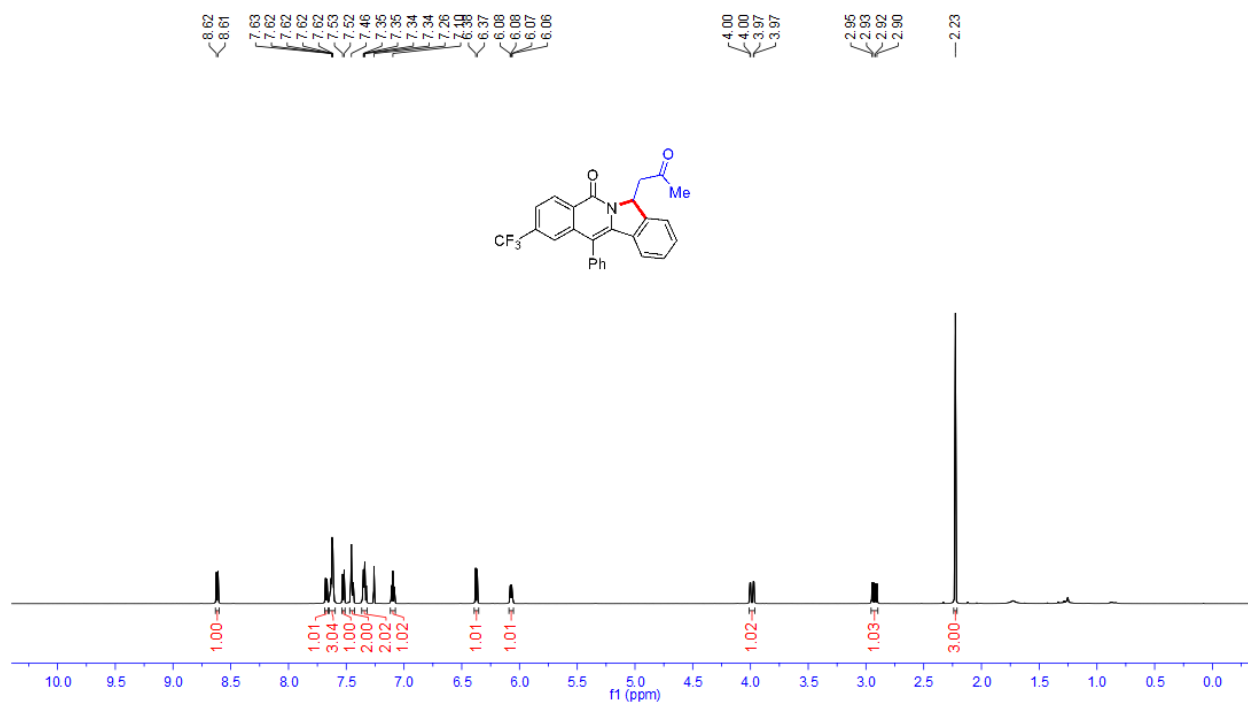

$^1\text{H}$  NMR spectrum of **3i** ( $\text{CDCl}_3$ , 600 MHz)

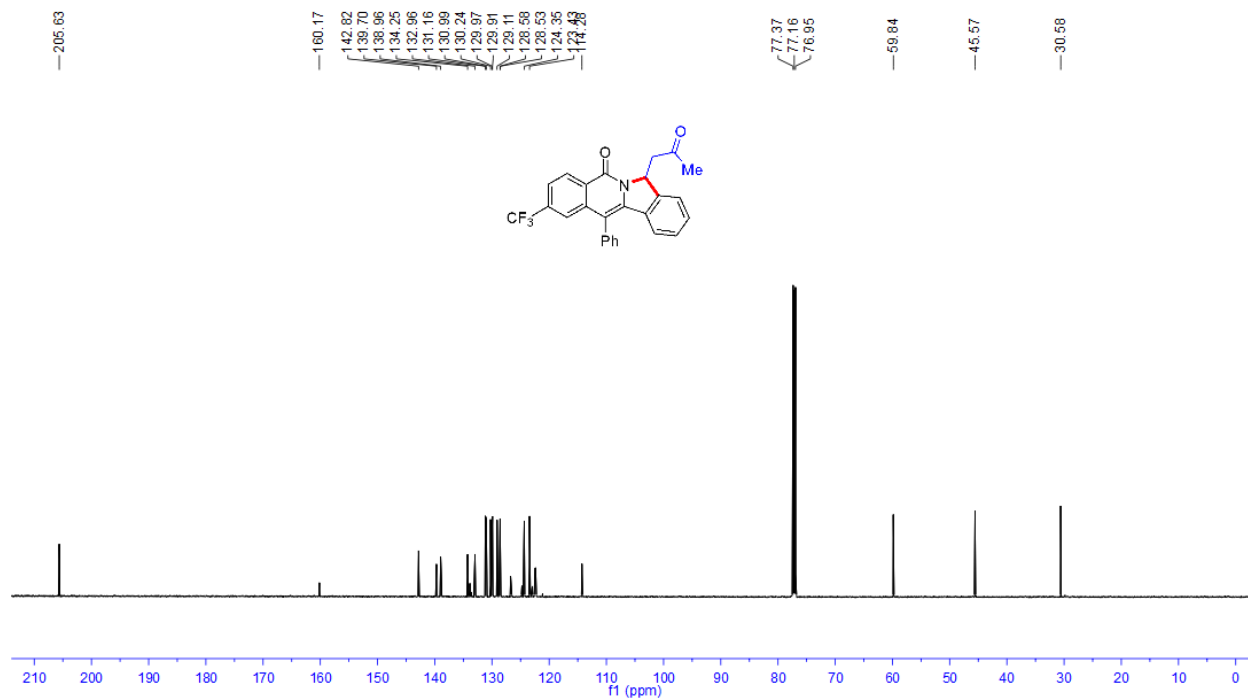

$^{13}\text{C}$  NMR spectrum of **3i** ( $\text{CDCl}_3$ , 151 MHz)

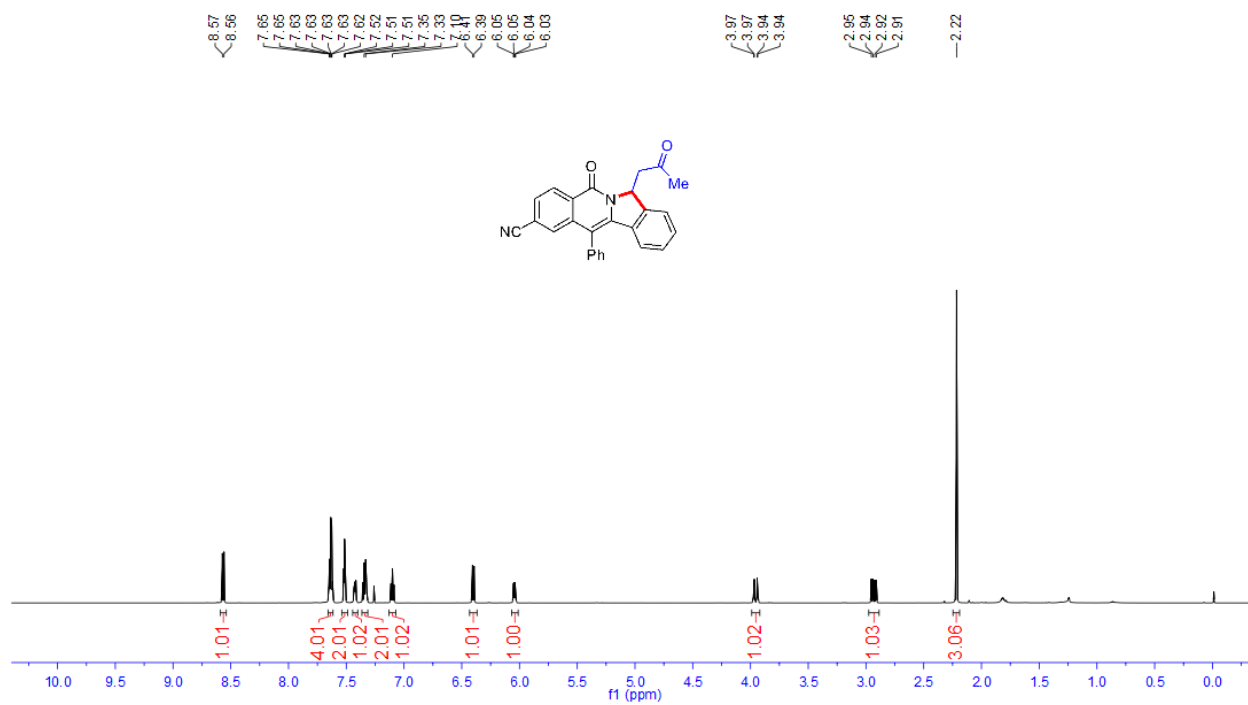

<sup>1</sup>H NMR spectrum of **3j** (CDCl<sub>3</sub>, 600 MHz)

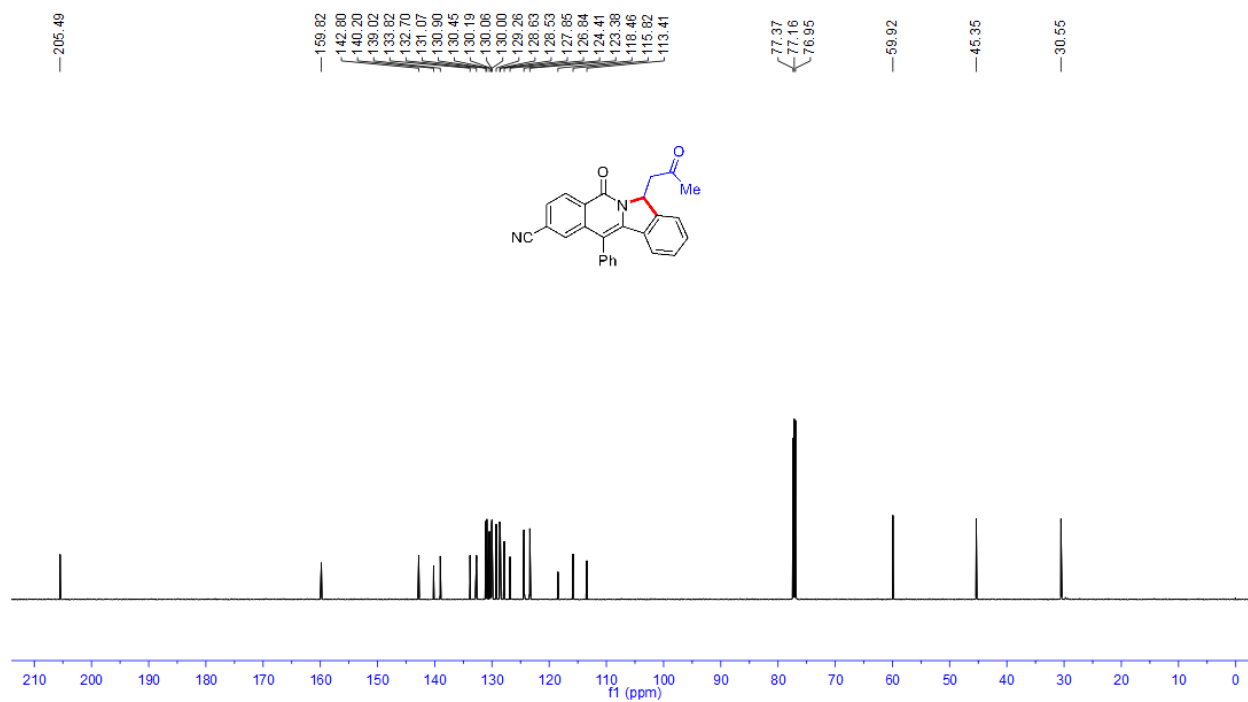

<sup>13</sup>C NMR spectrum of **3j** (CDCl<sub>3</sub>, 151 MHz)

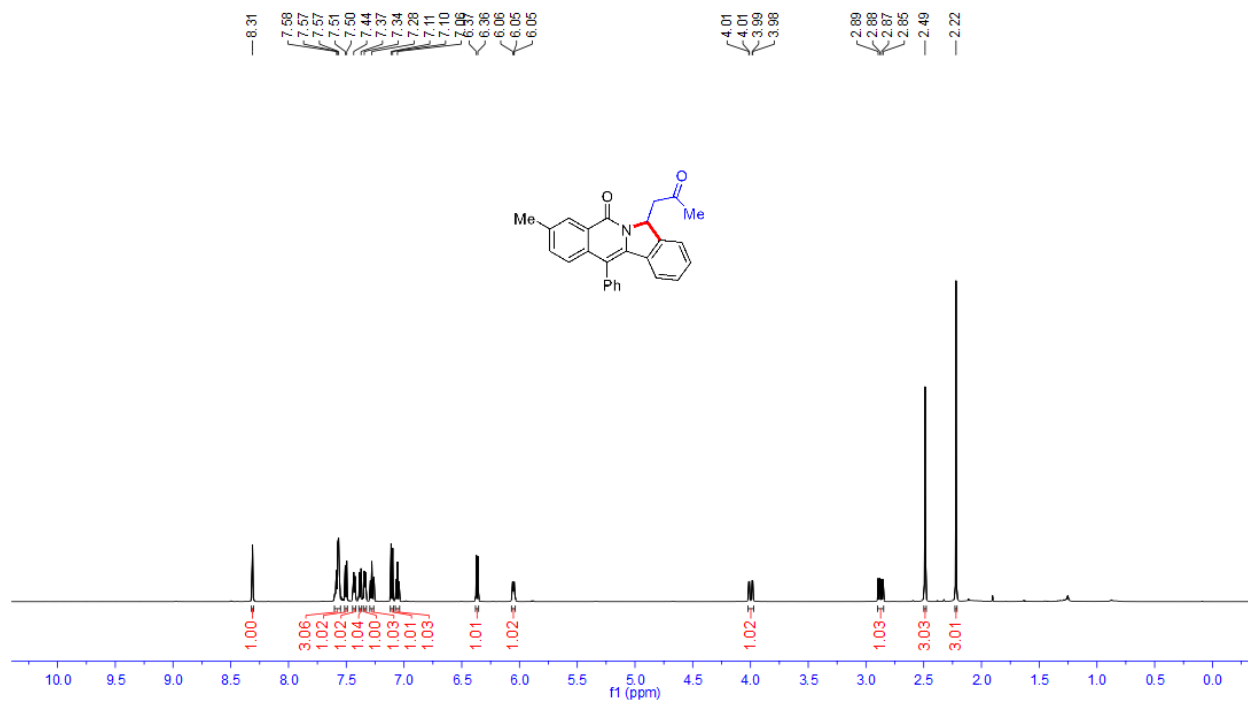

<sup>1</sup>H NMR spectrum of **3k** (CDCl<sub>3</sub>, 600 MHz)

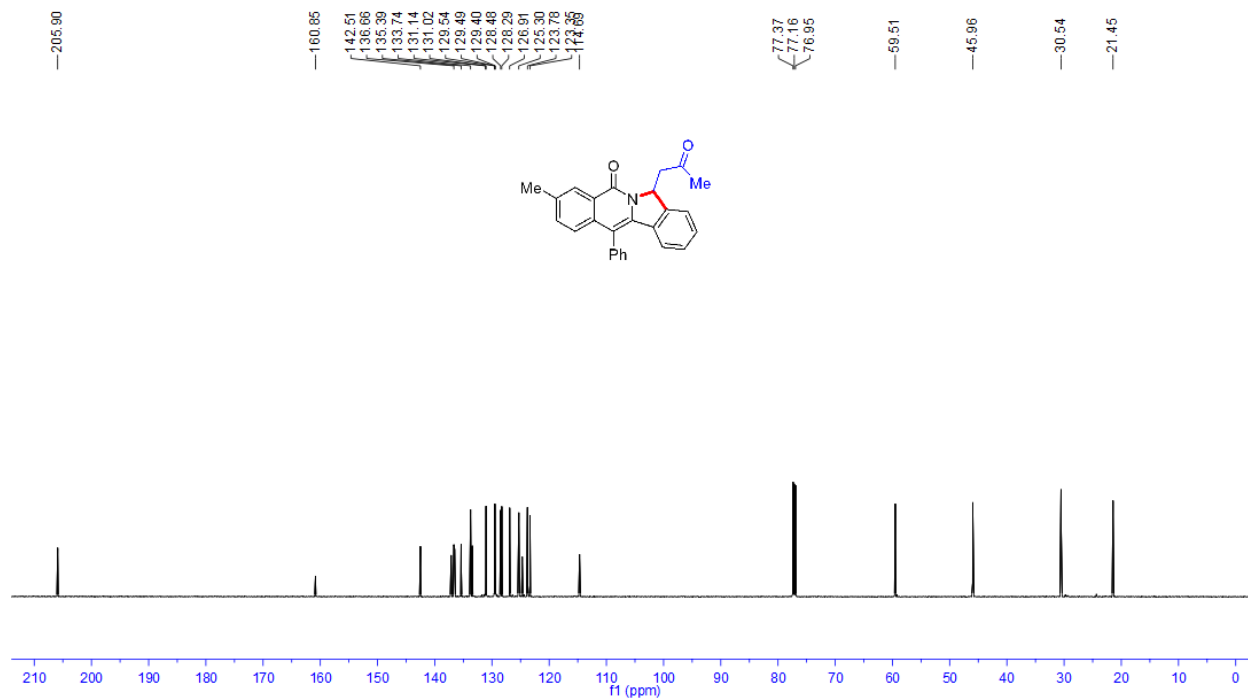

<sup>13</sup>C NMR spectrum of **3k** (CDCl<sub>3</sub>, 151 MHz)

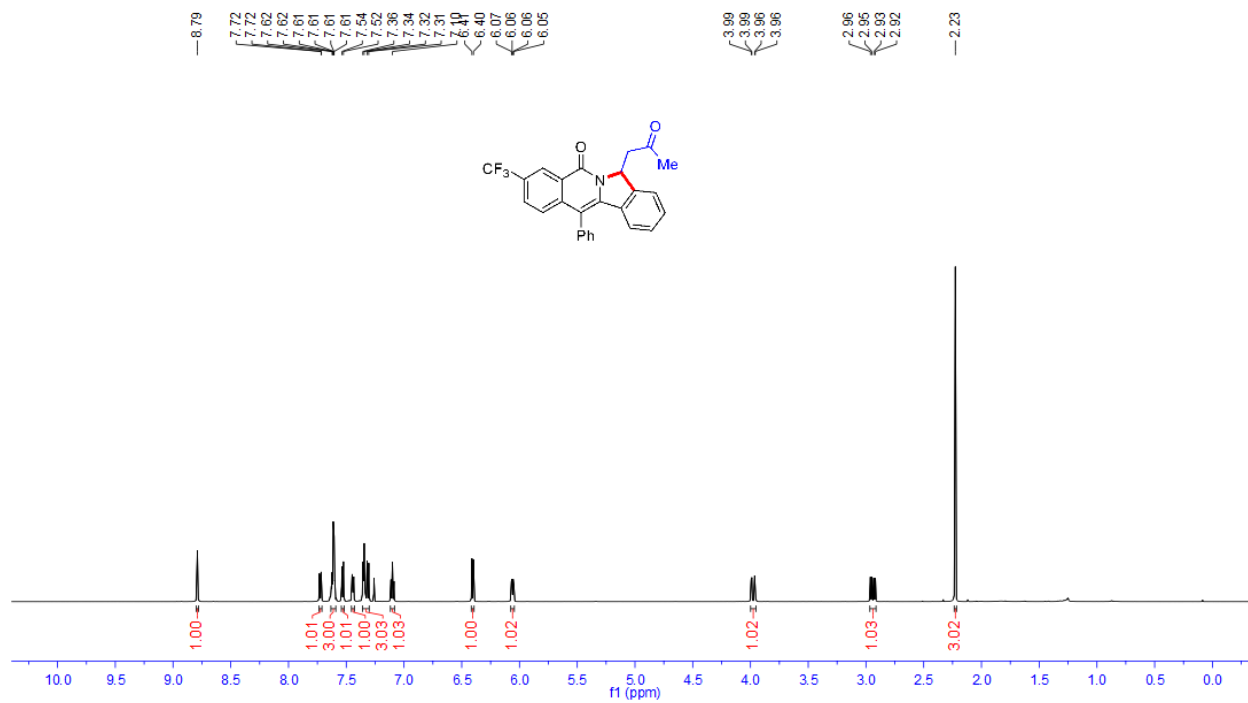

$^1\text{H}$  NMR spectrum of **31** ( $\text{CDCl}_3$ , 600 MHz)

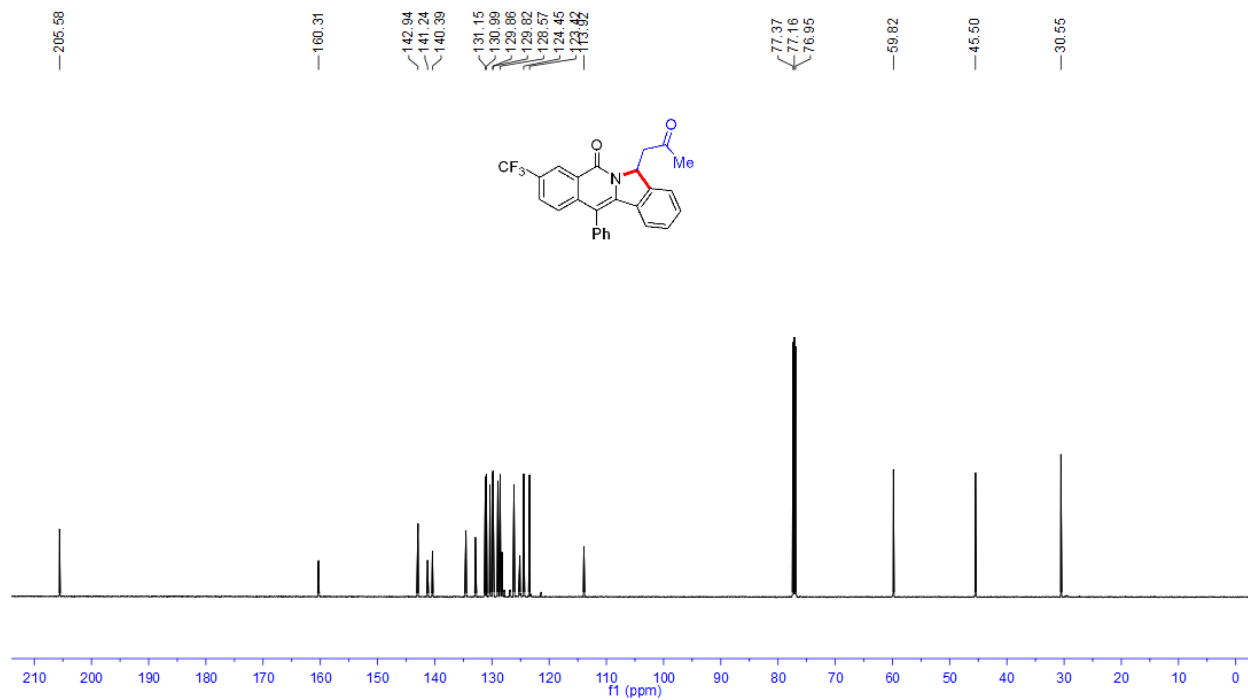

$^{13}\text{C}$  NMR spectrum of **31** ( $\text{CDCl}_3$ , 151 MHz)

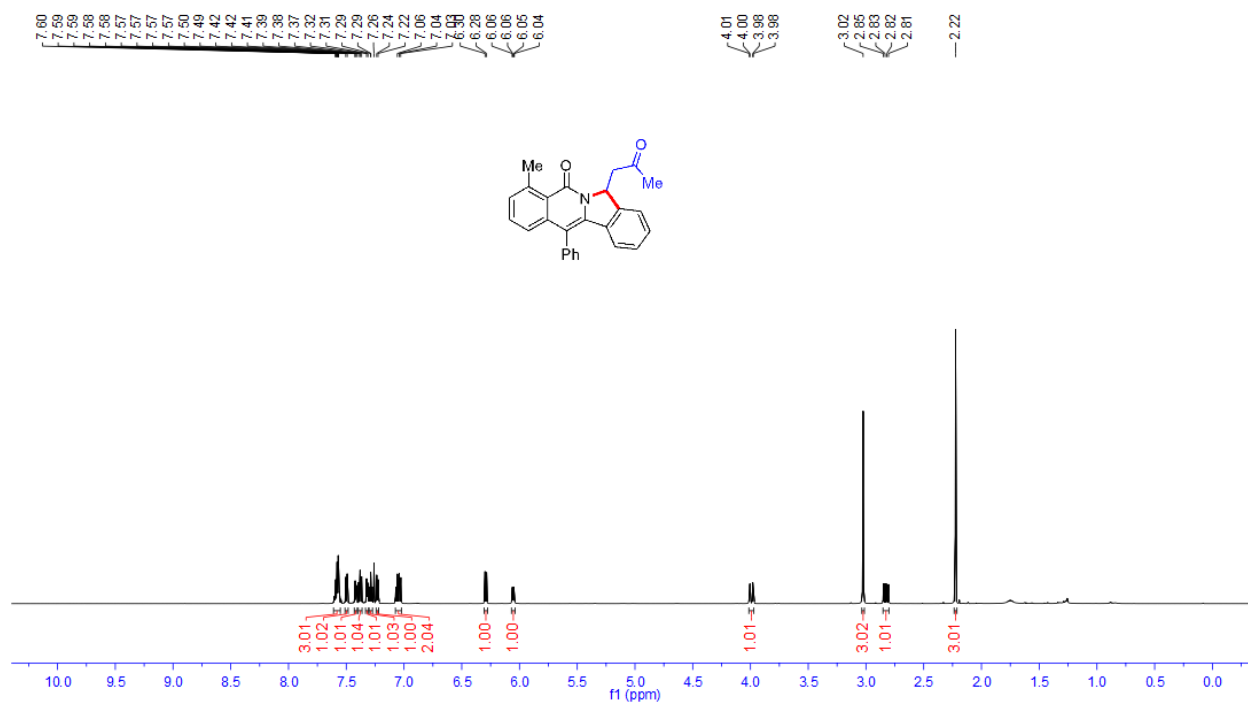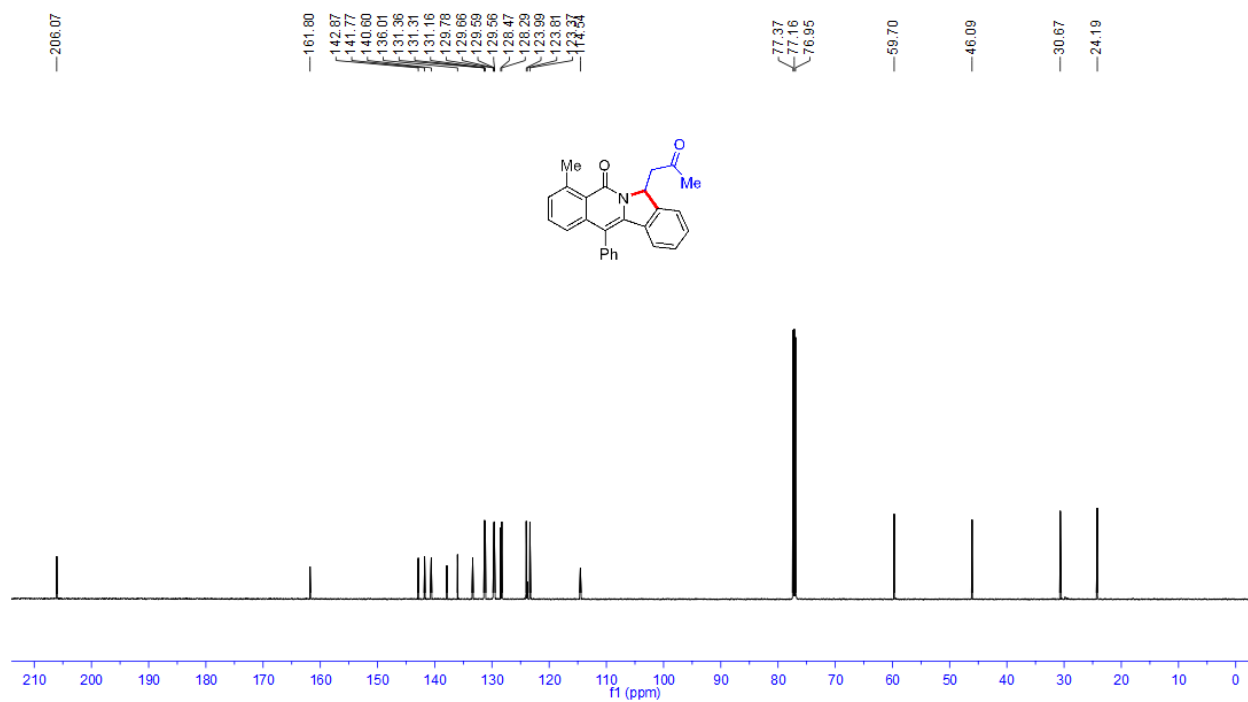

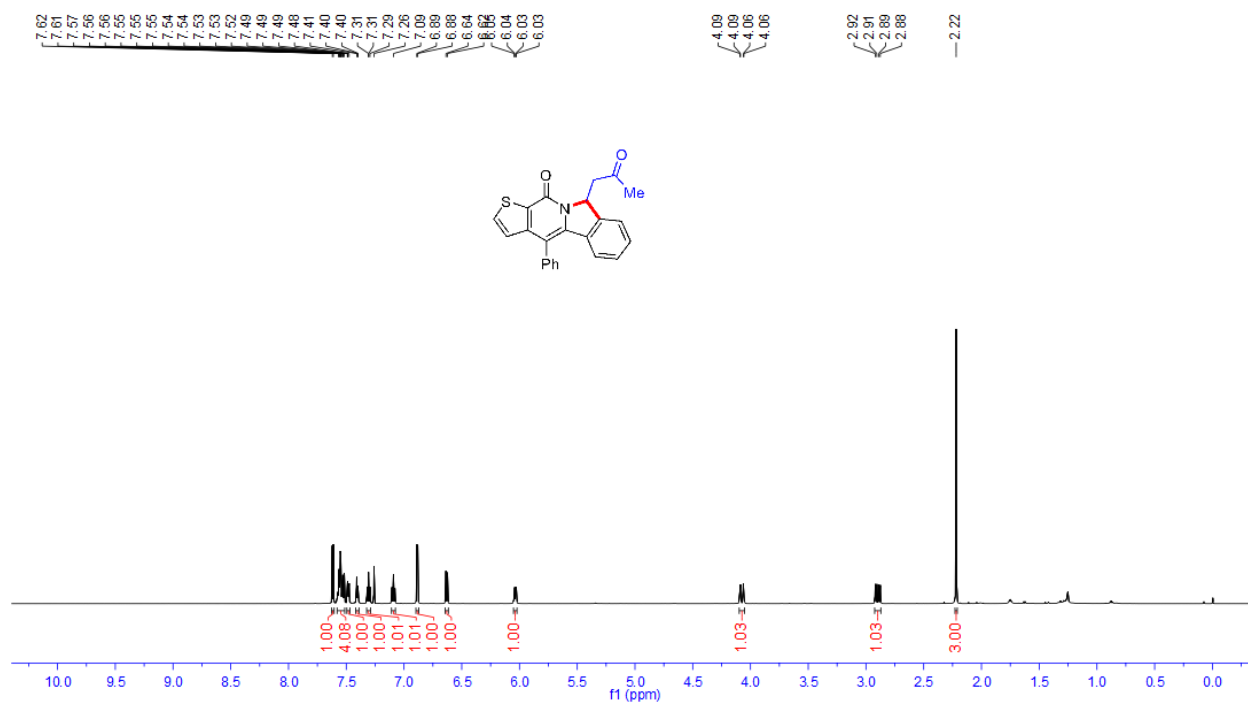

<sup>1</sup>H NMR spectrum of **3n** (CDCl<sub>3</sub>, 600 MHz)

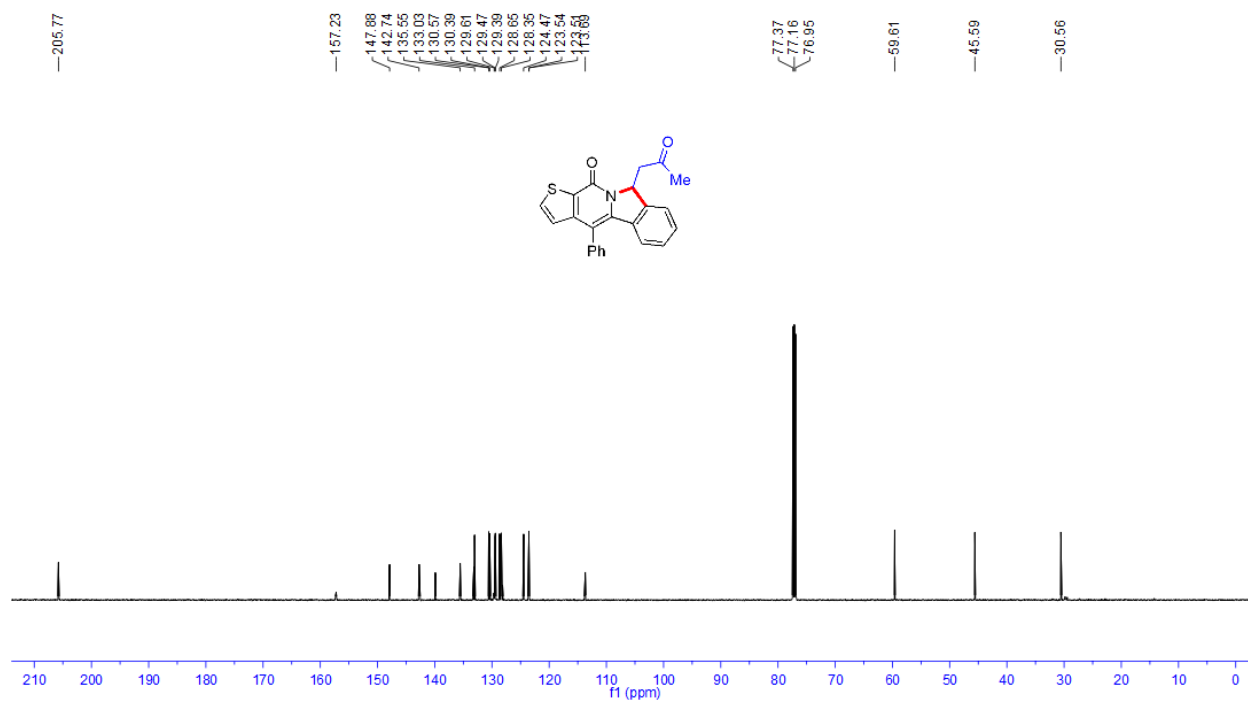

<sup>13</sup>C NMR spectrum of **3n** (CDCl<sub>3</sub>, 151 MHz)

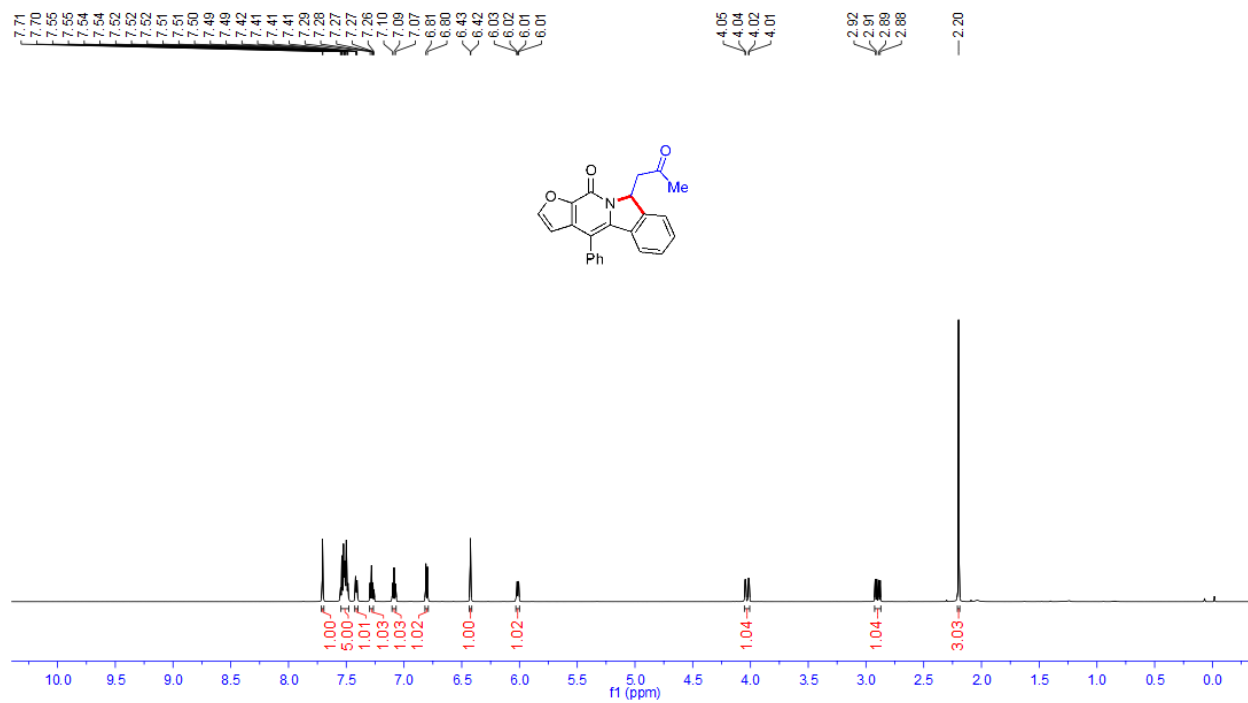

<sup>1</sup>H NMR spectrum of **3o** (CDCl<sub>3</sub>, 600 MHz)

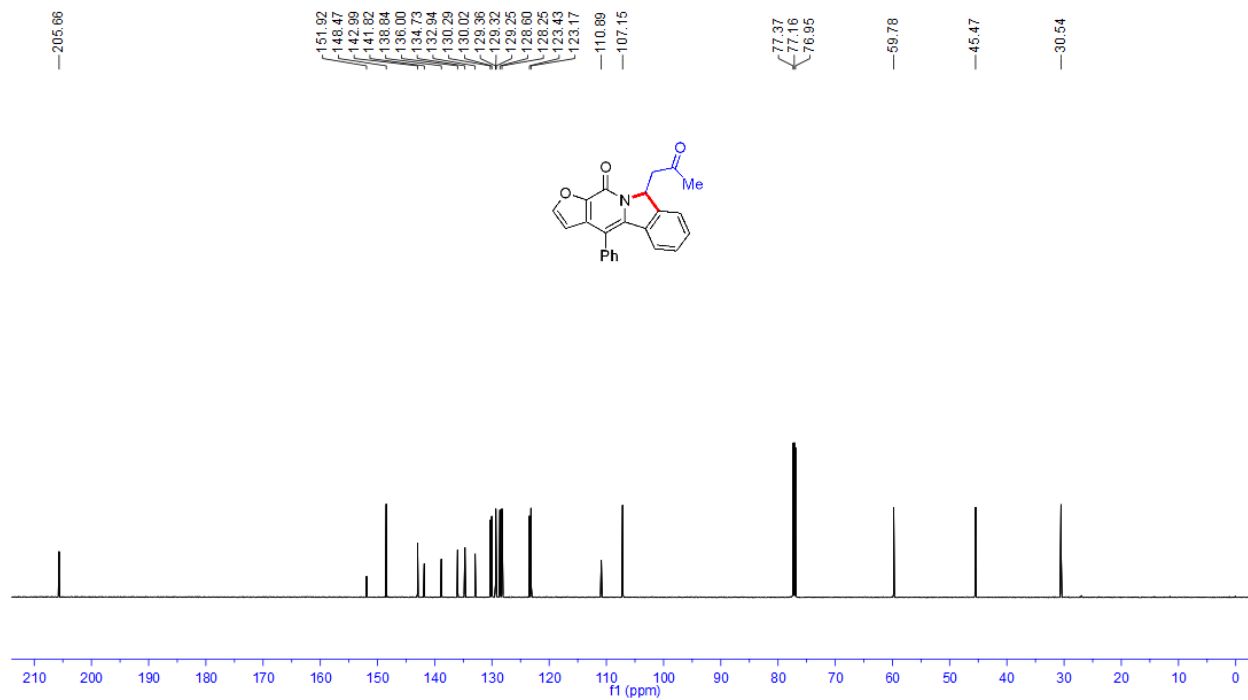

<sup>13</sup>C NMR spectrum of **3o** (CDCl<sub>3</sub>, 151 MHz)



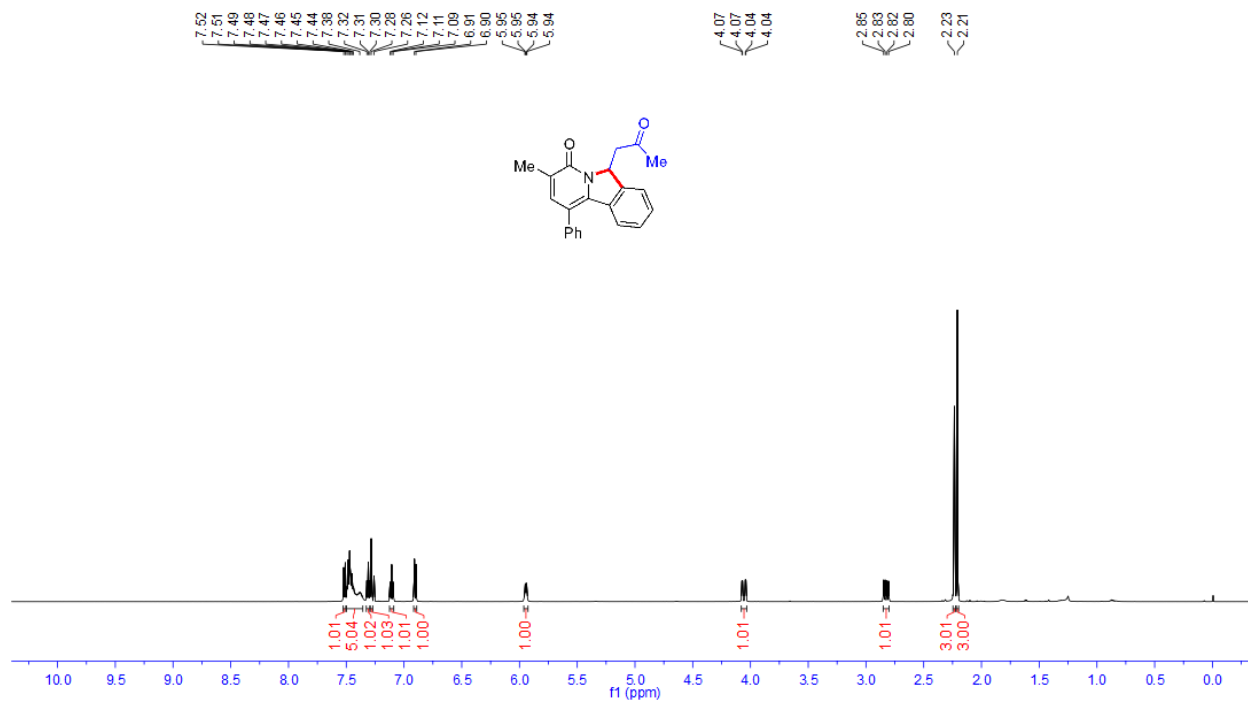

<sup>1</sup>H NMR spectrum of **3p** (CDCl<sub>3</sub>, 600 MHz)

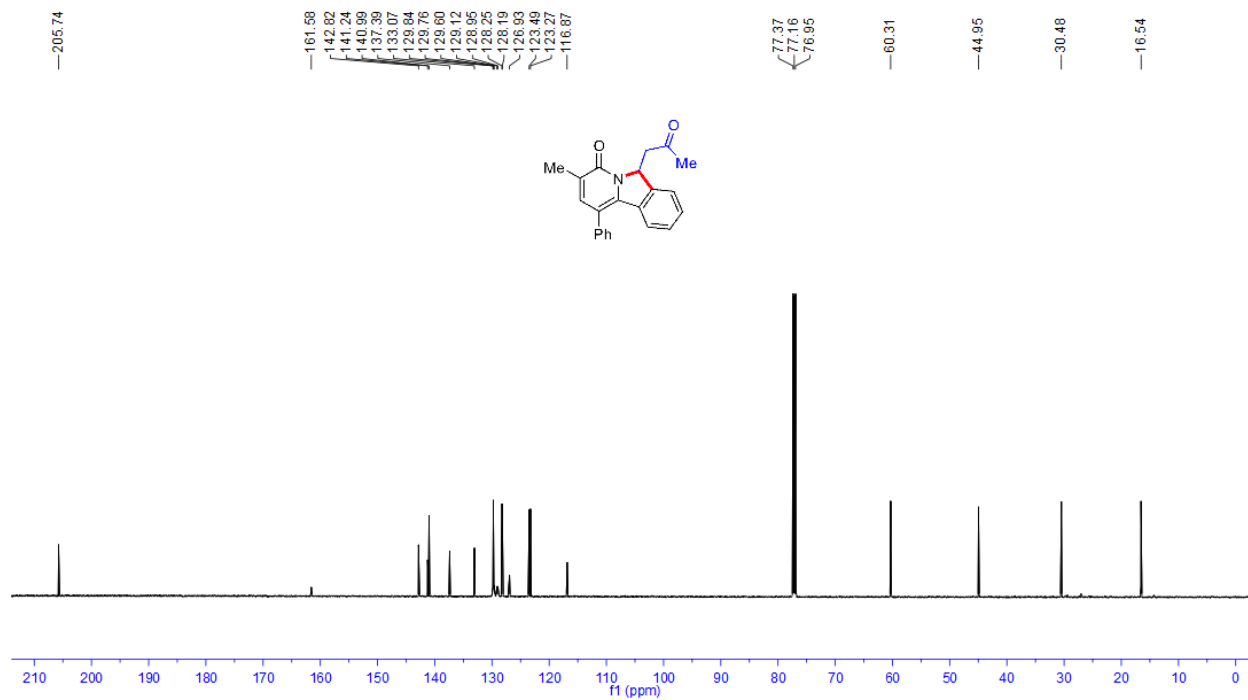

<sup>13</sup>C NMR spectrum of **3p** (CDCl<sub>3</sub>, 151 MHz)

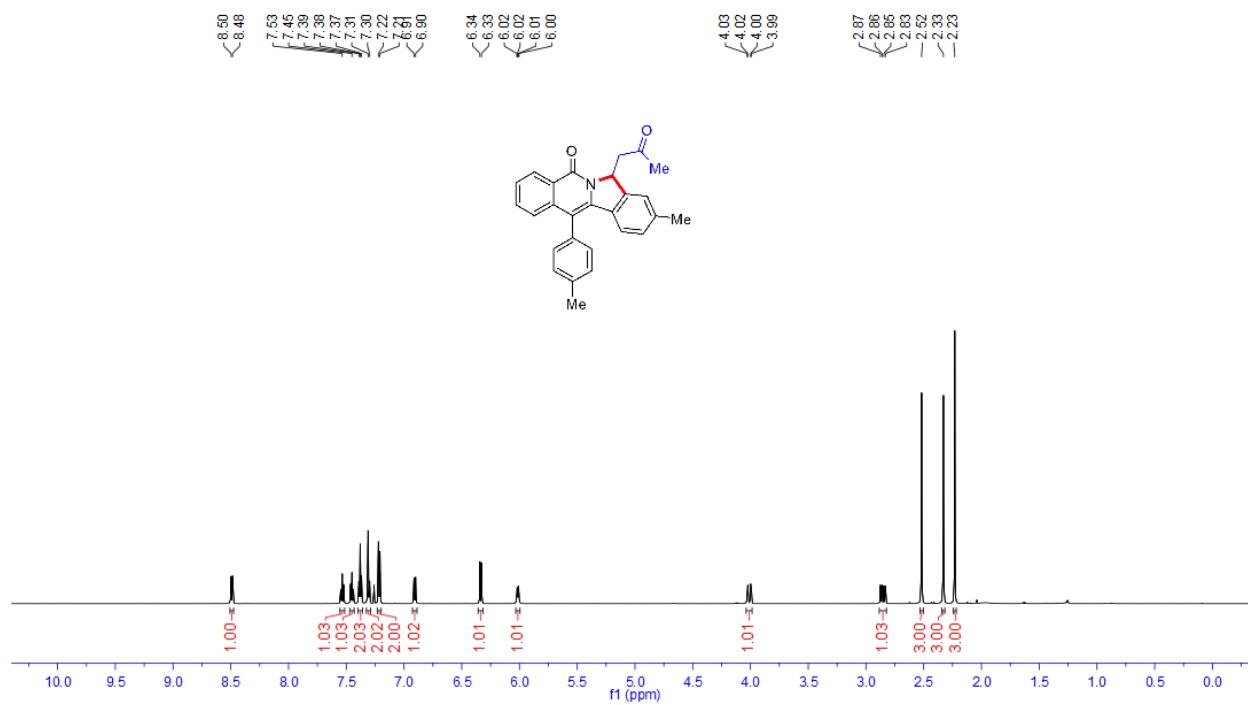

<sup>1</sup>H NMR spectrum of **3q** (CDCl<sub>3</sub>, 600 MHz)

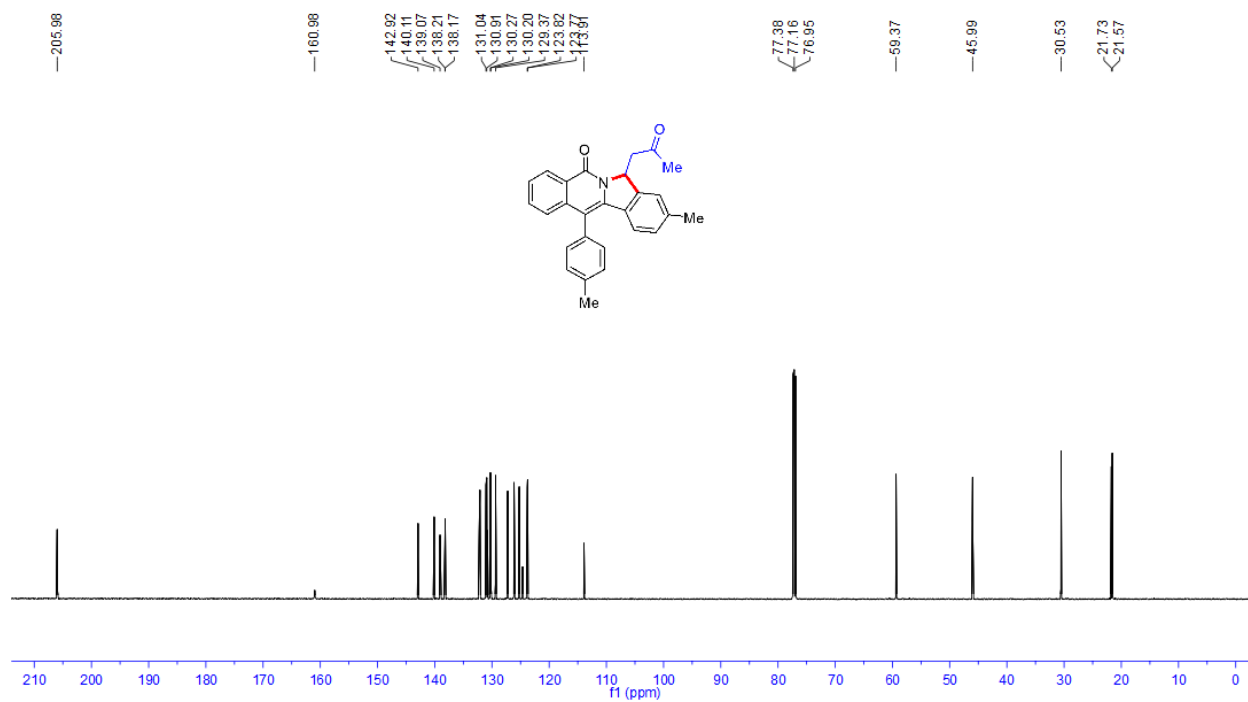

<sup>13</sup>C NMR spectrum of **3q** (CDCl<sub>3</sub>, 151 MHz)

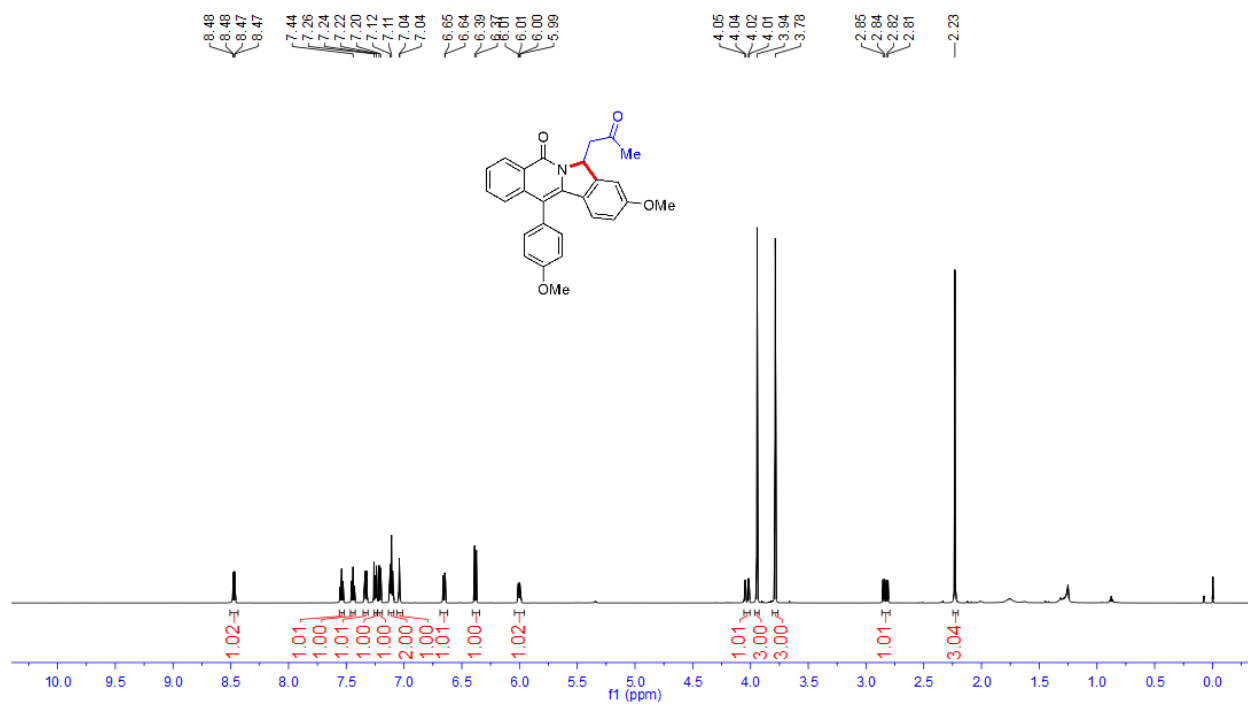

<sup>1</sup>H NMR spectrum of **3r** (CDCl<sub>3</sub>, 600 MHz)

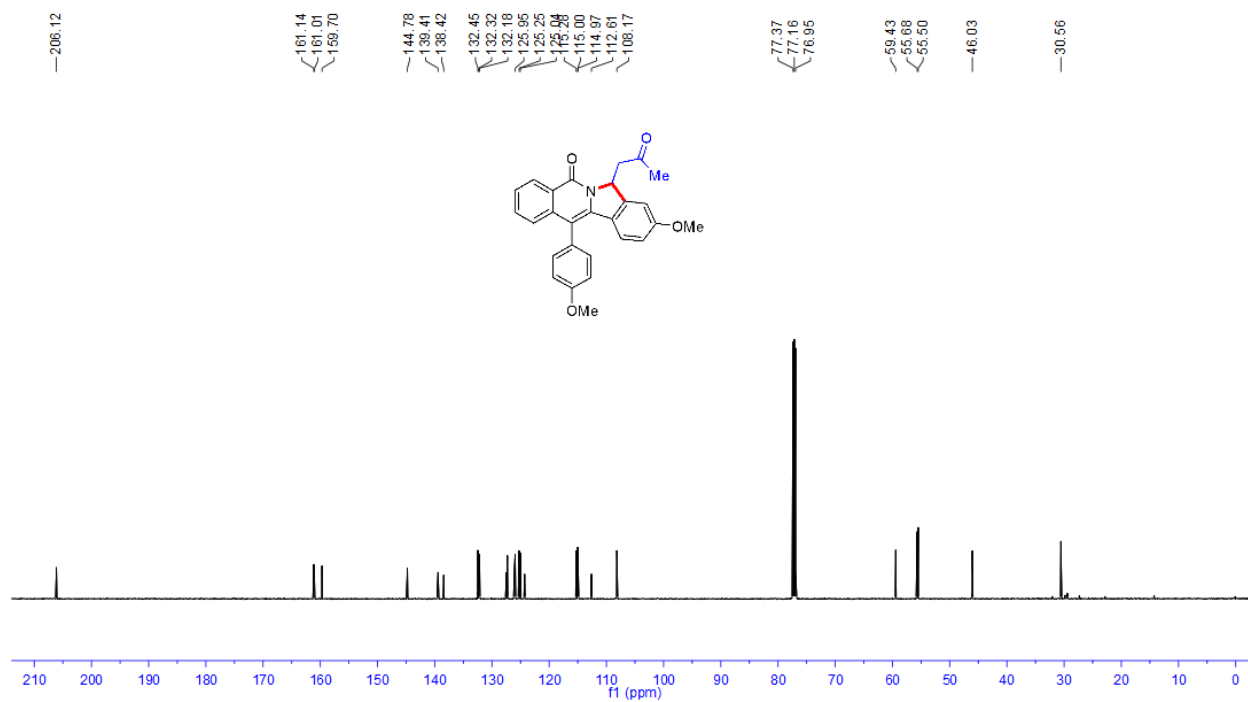

<sup>13</sup>C NMR spectrum of **3r** (CDCl<sub>3</sub>, 151 MHz)

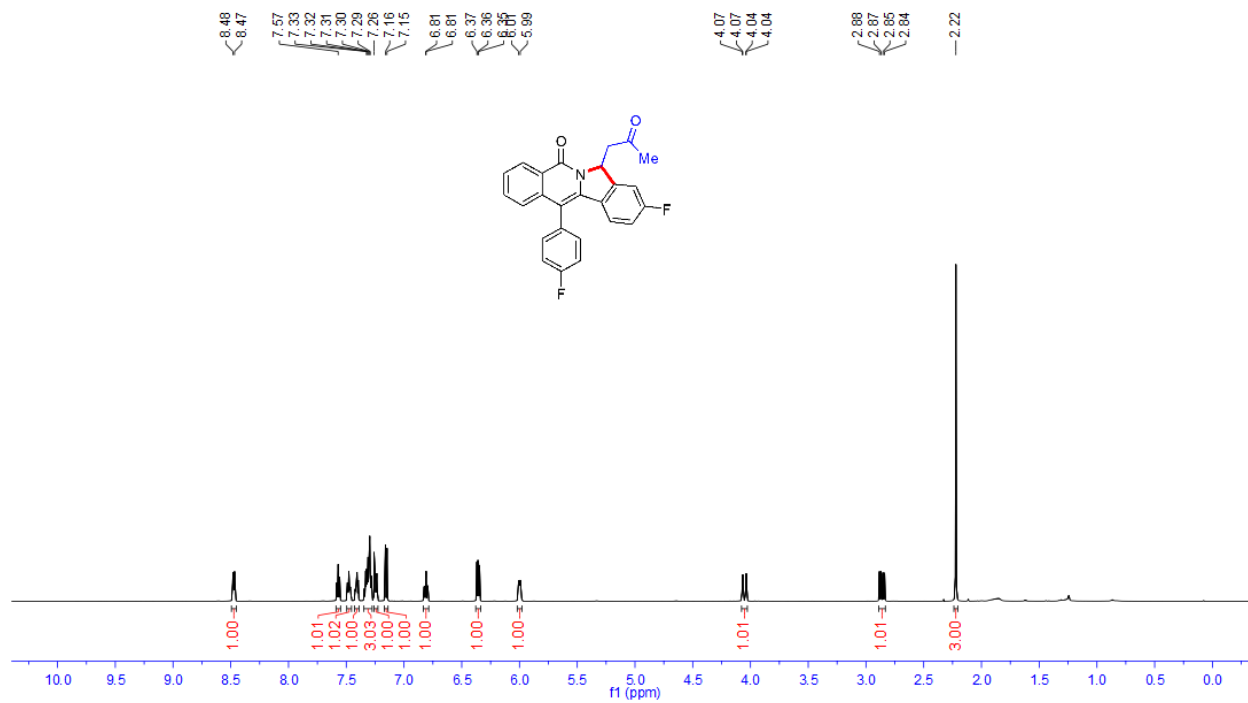

<sup>1</sup>H NMR spectrum of **3s** (CDCl<sub>3</sub>, 600 MHz)

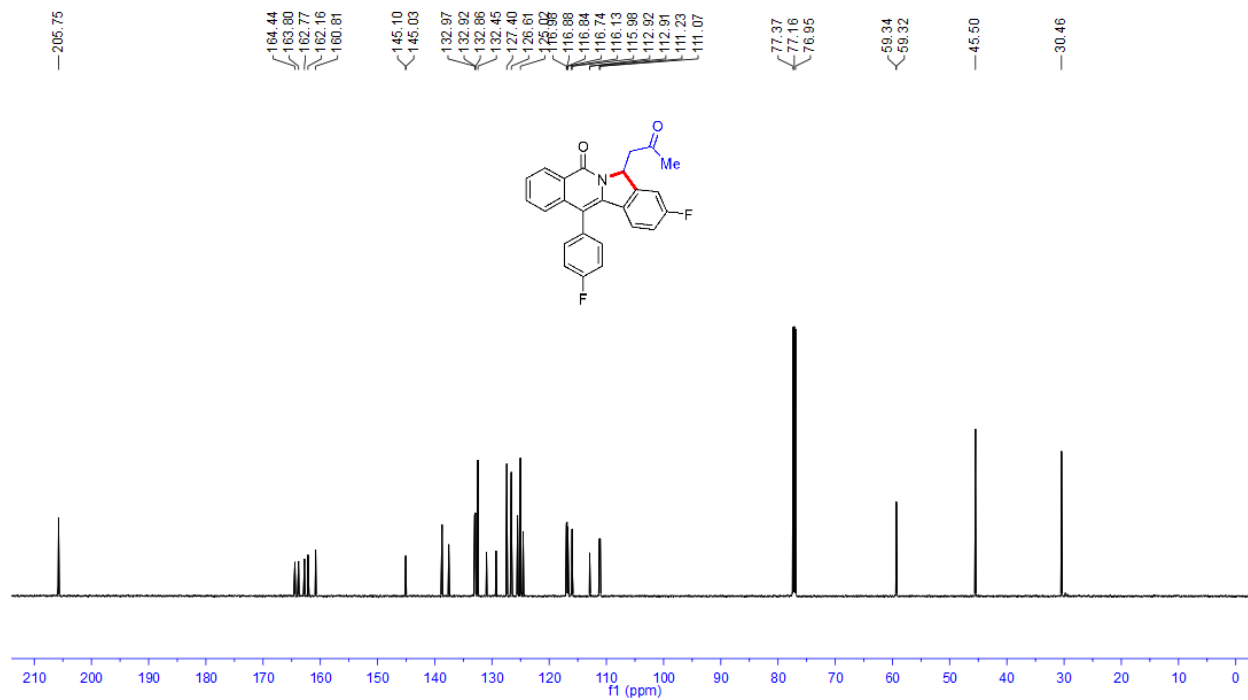

<sup>13</sup>C NMR spectrum of **3s** (CDCl<sub>3</sub>, 151 MHz)

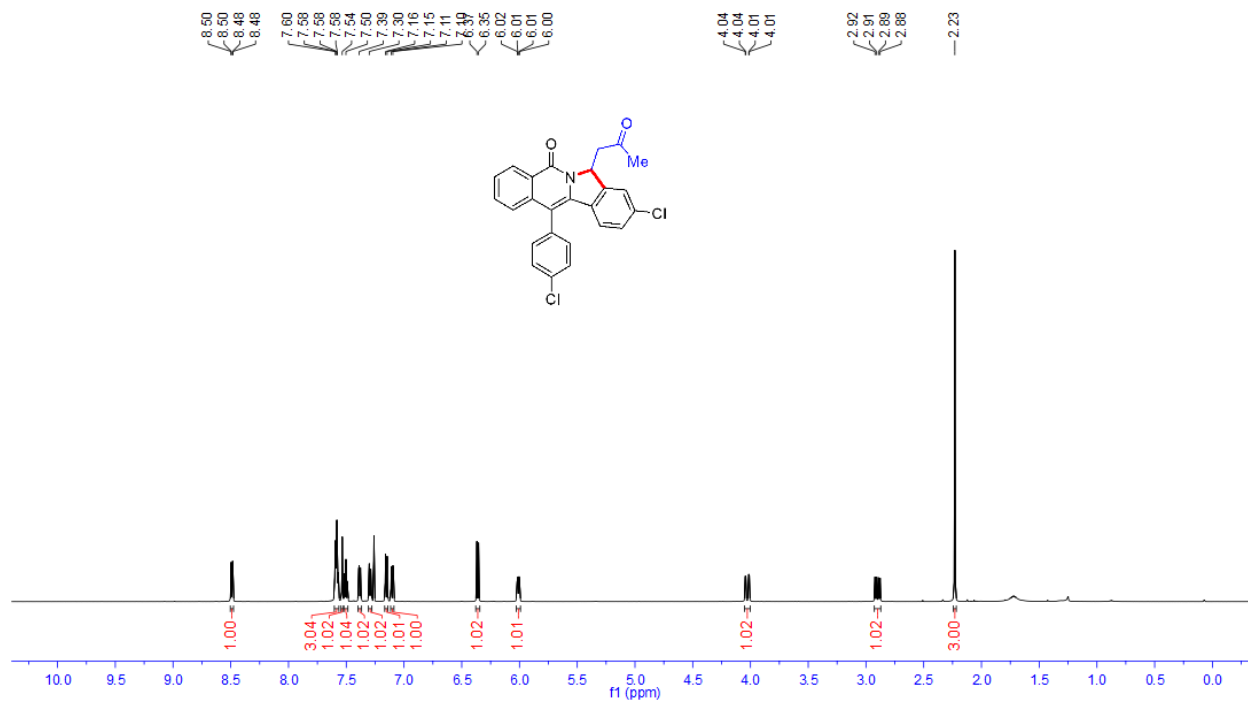

<sup>1</sup>H NMR spectrum of **3t** (CDCl<sub>3</sub>, 600 MHz)

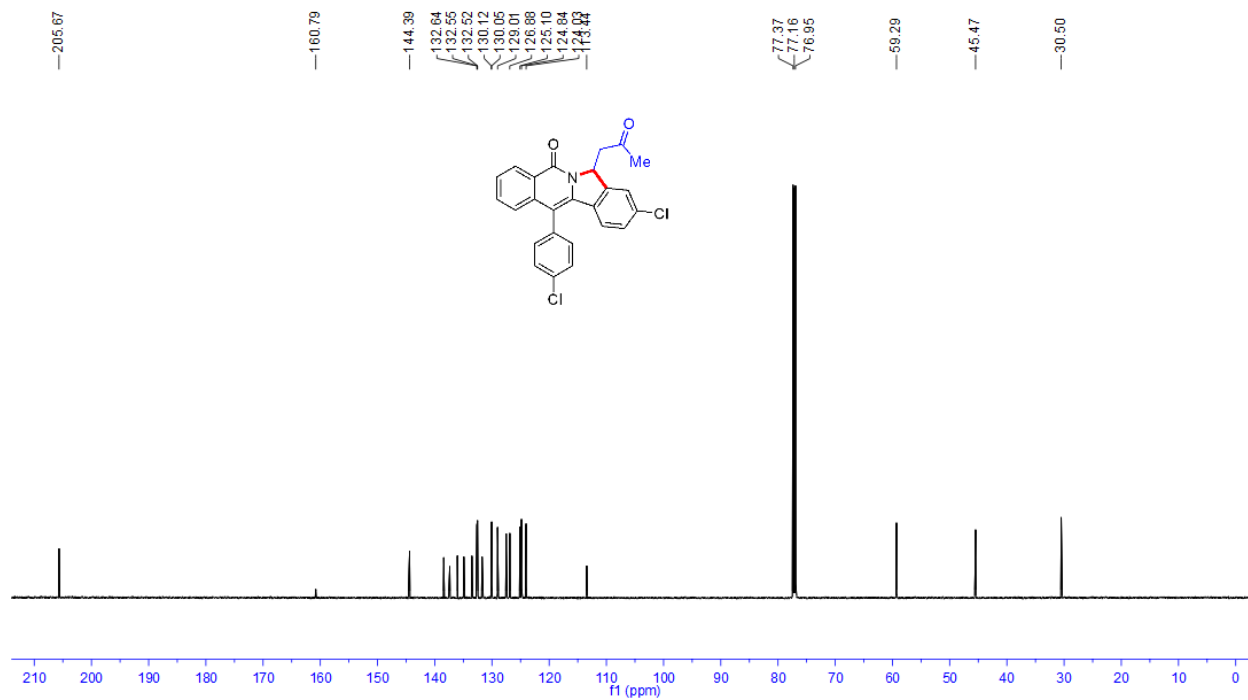

<sup>13</sup>C NMR spectrum of **3t** (CDCl<sub>3</sub>, 151 MHz)

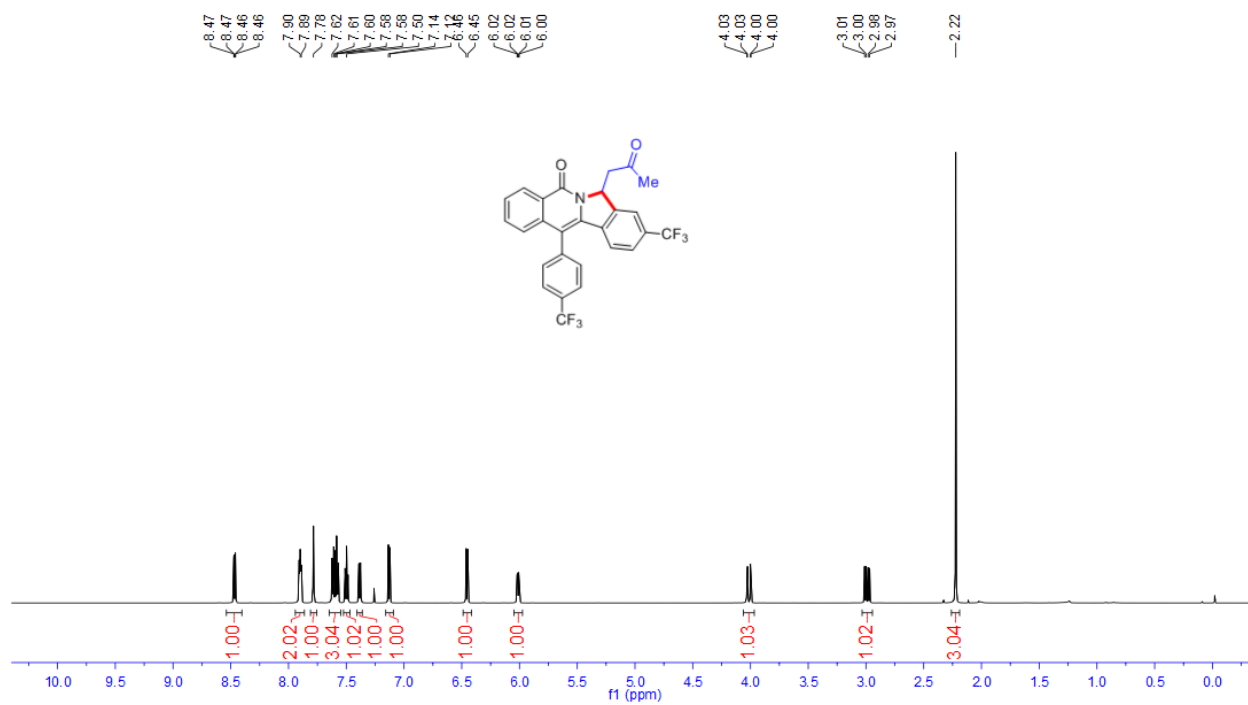

$^1\text{H}$  NMR spectrum of **3u** ( $\text{CDCl}_3$ , 600 MHz)

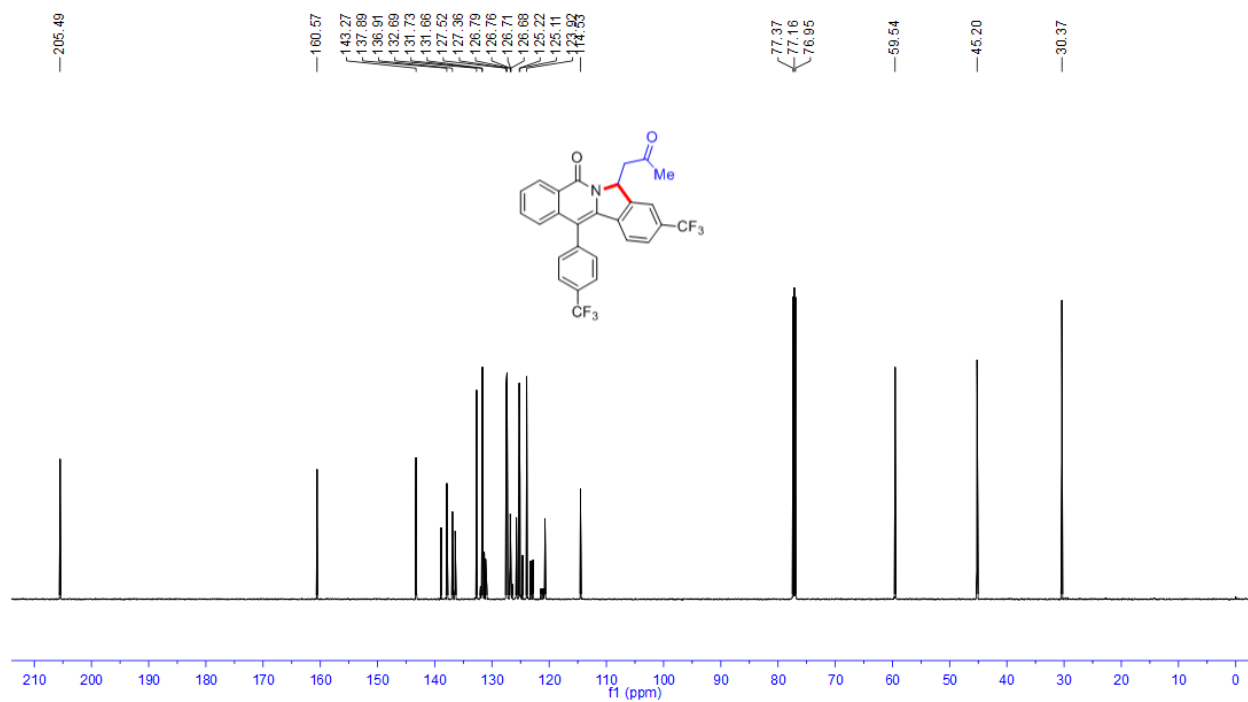

$^{13}\text{C}$  NMR spectrum of **3u** ( $\text{CDCl}_3$ , 151 MHz)

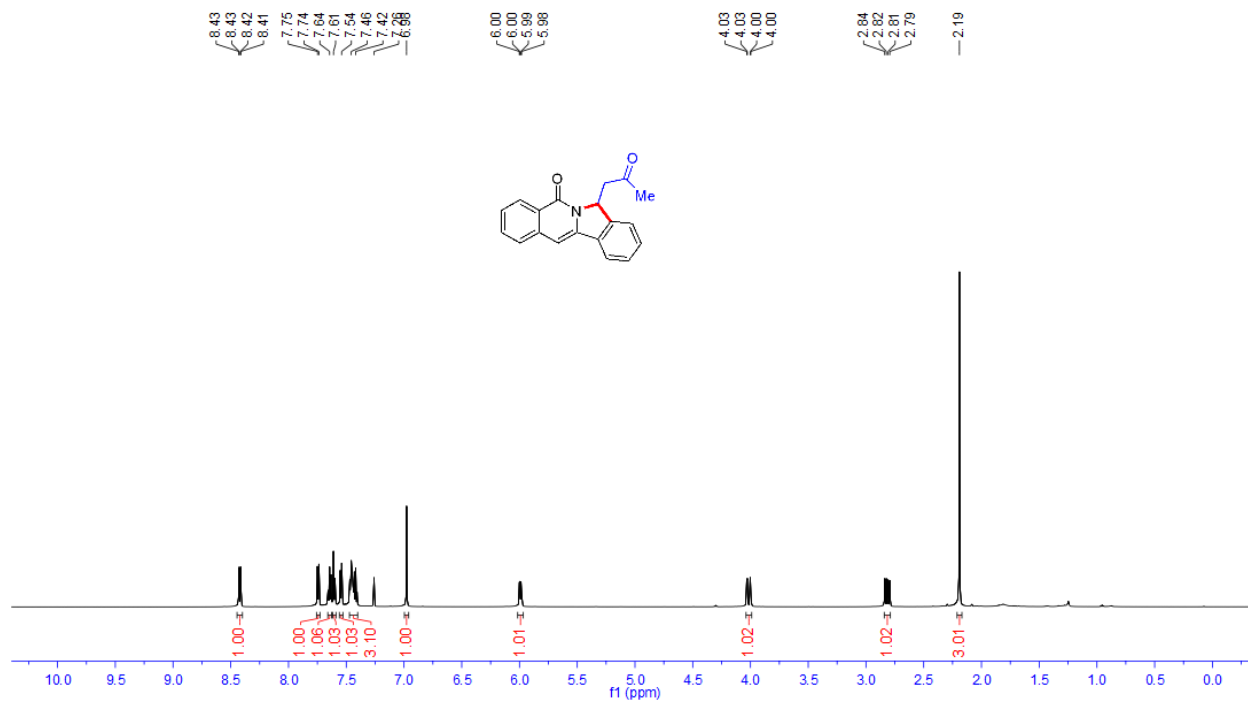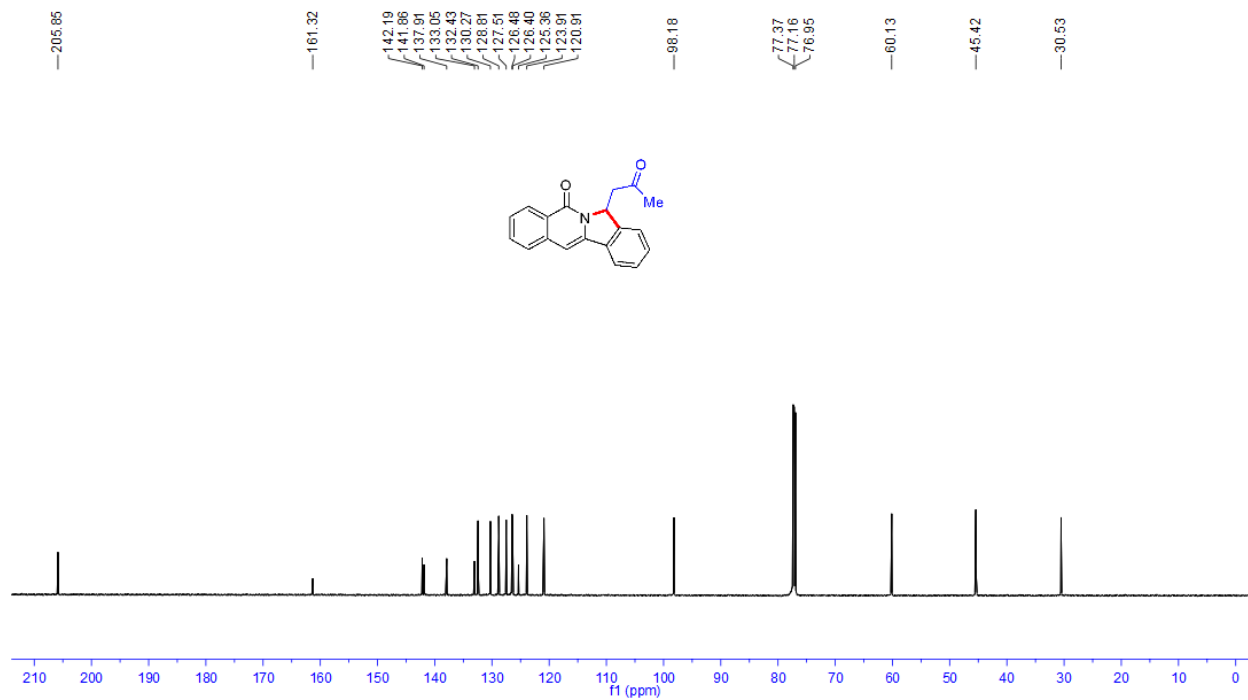

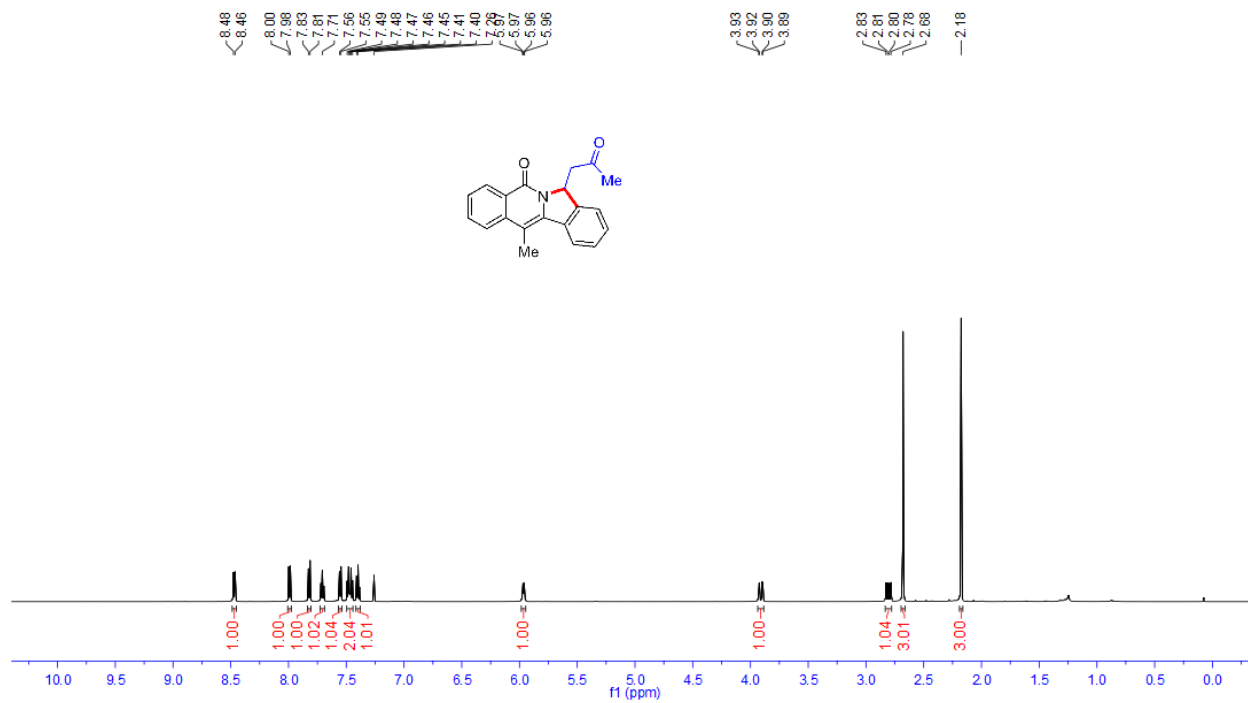

<sup>1</sup>H NMR spectrum of **3w** (CDCl<sub>3</sub>, 600 MHz)

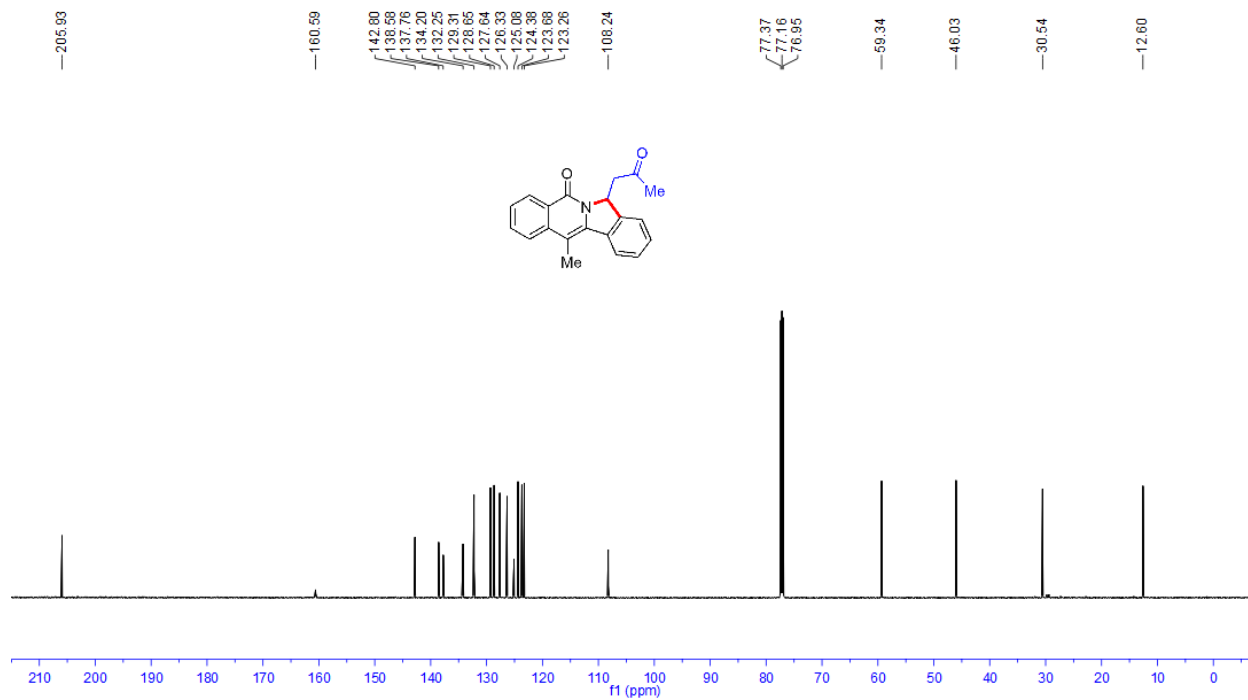

<sup>13</sup>C NMR spectrum of **3w** (CDCl<sub>3</sub>, 151 MHz)



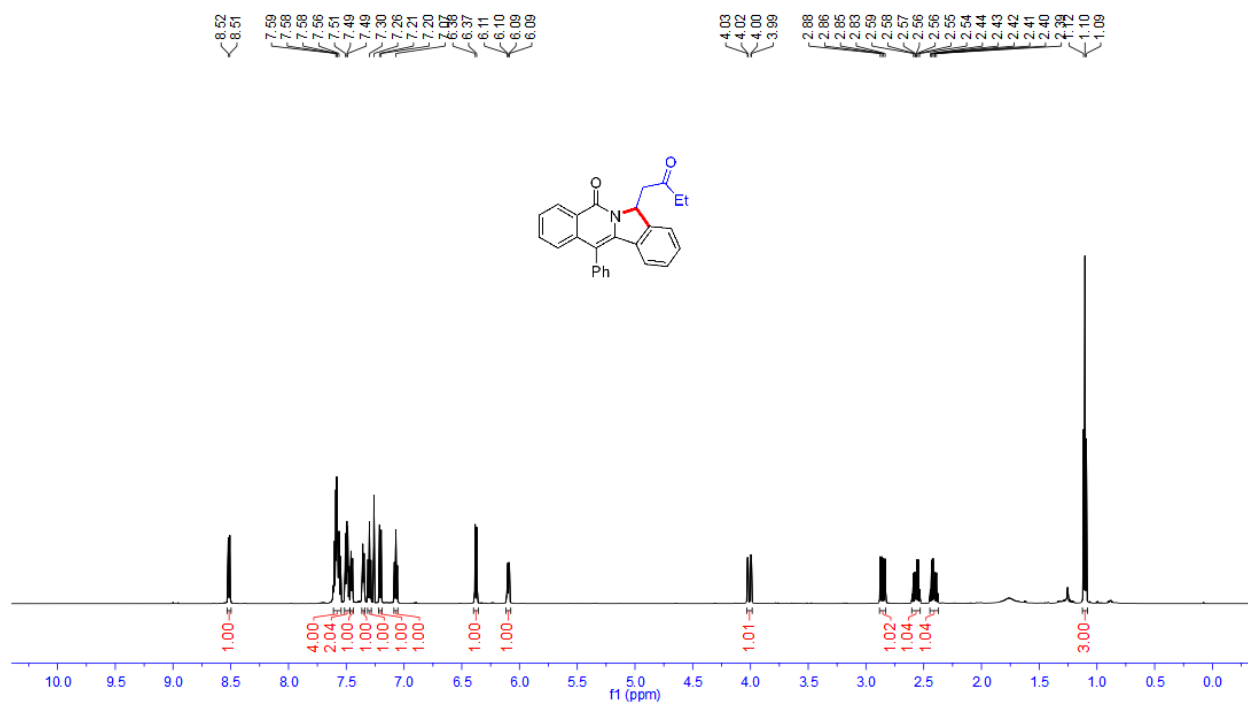

<sup>1</sup>H NMR spectrum of **3y** (CDCl<sub>3</sub>, 600 MHz)

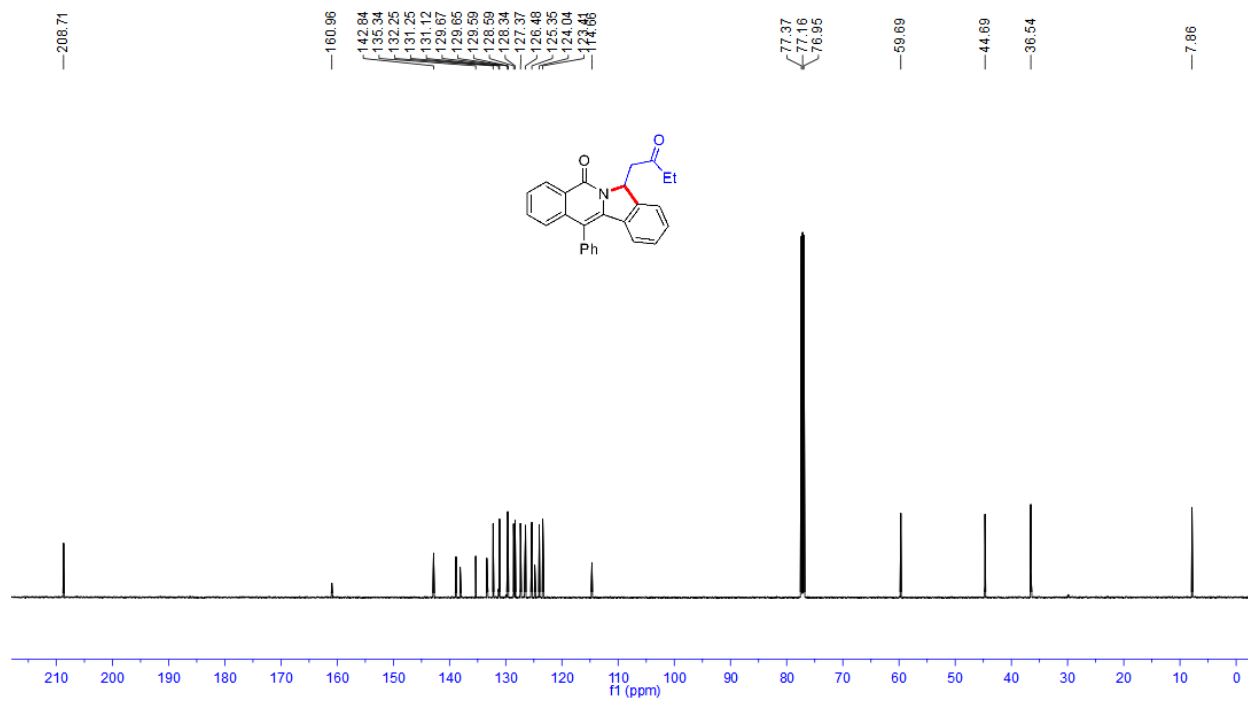

<sup>13</sup>C NMR spectrum of **3y** (CDCl<sub>3</sub>, 151 MHz)

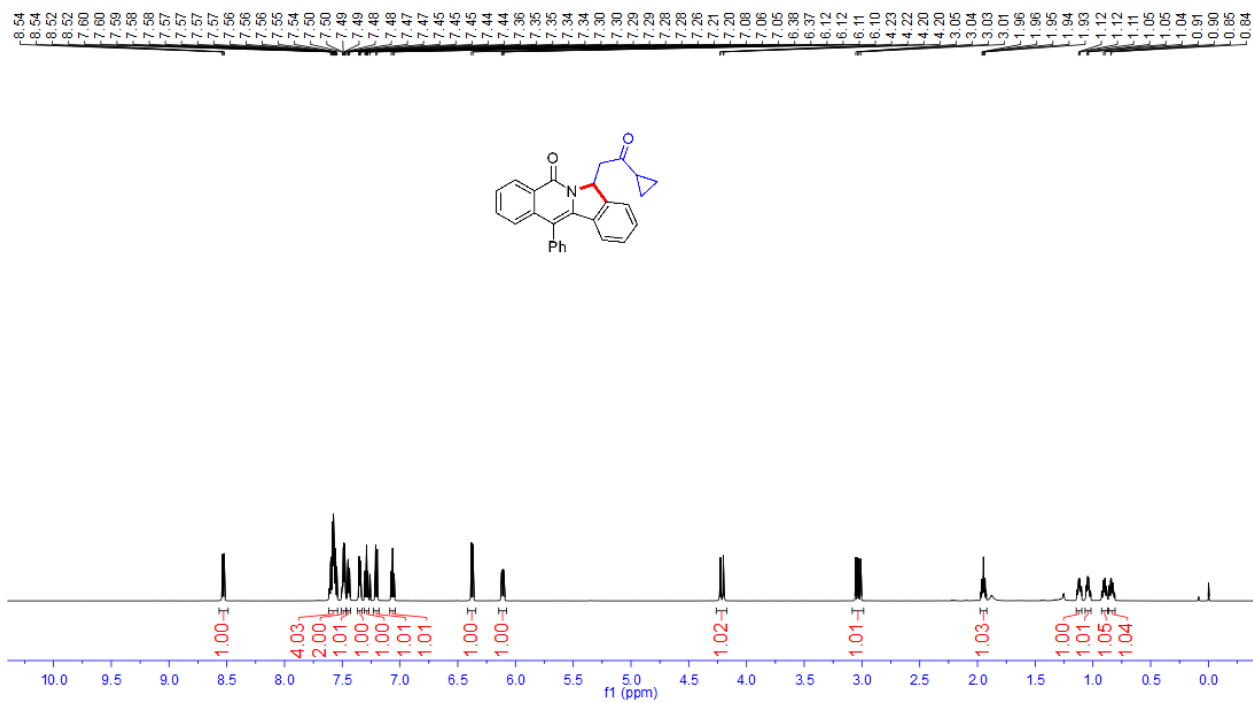

<sup>1</sup>H NMR spectrum of **3z** (CDCl<sub>3</sub>, 600 MHz)

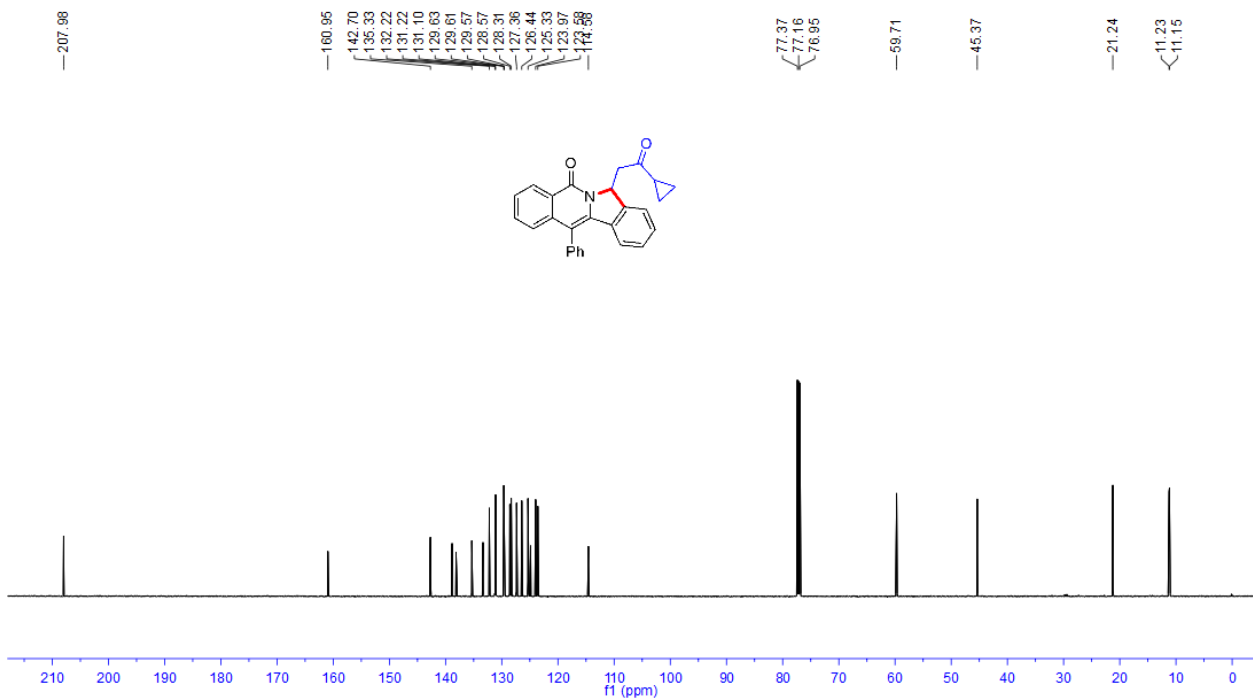

<sup>13</sup>C NMR spectrum of **3z** (CDCl<sub>3</sub>, 151 MHz)

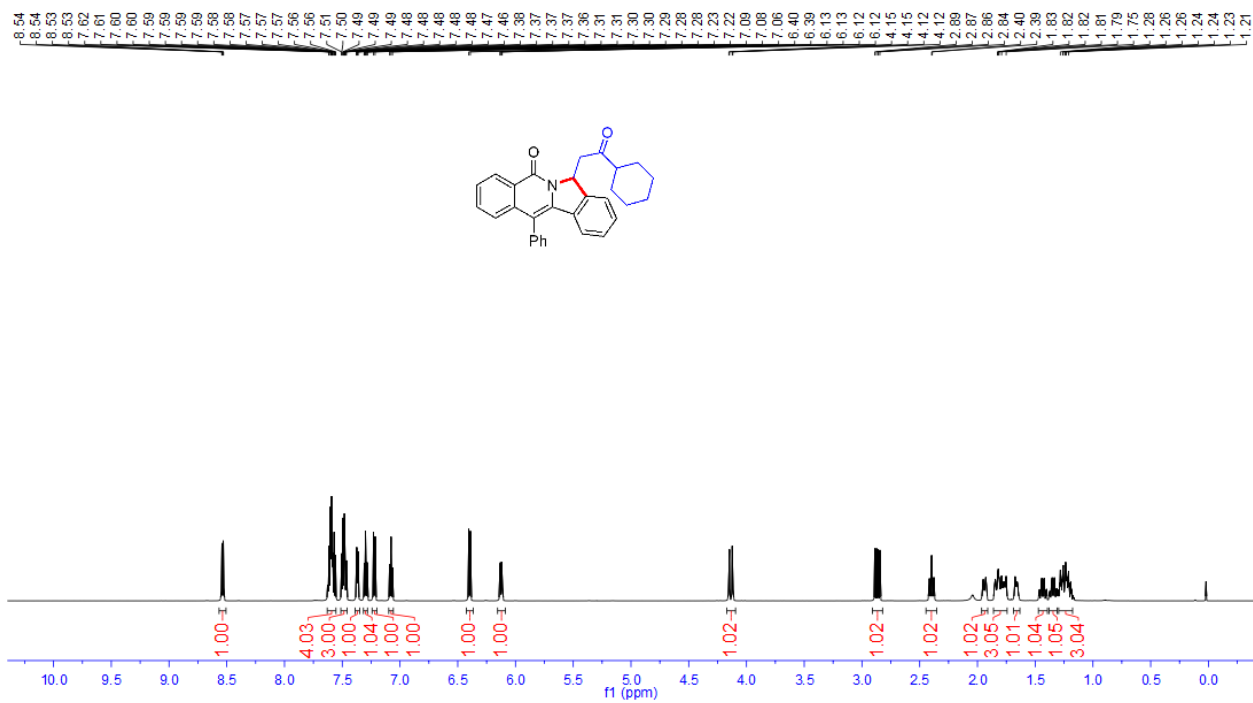

<sup>1</sup>H NMR spectrum of **3aa** (CDCl<sub>3</sub>, 600 MHz)

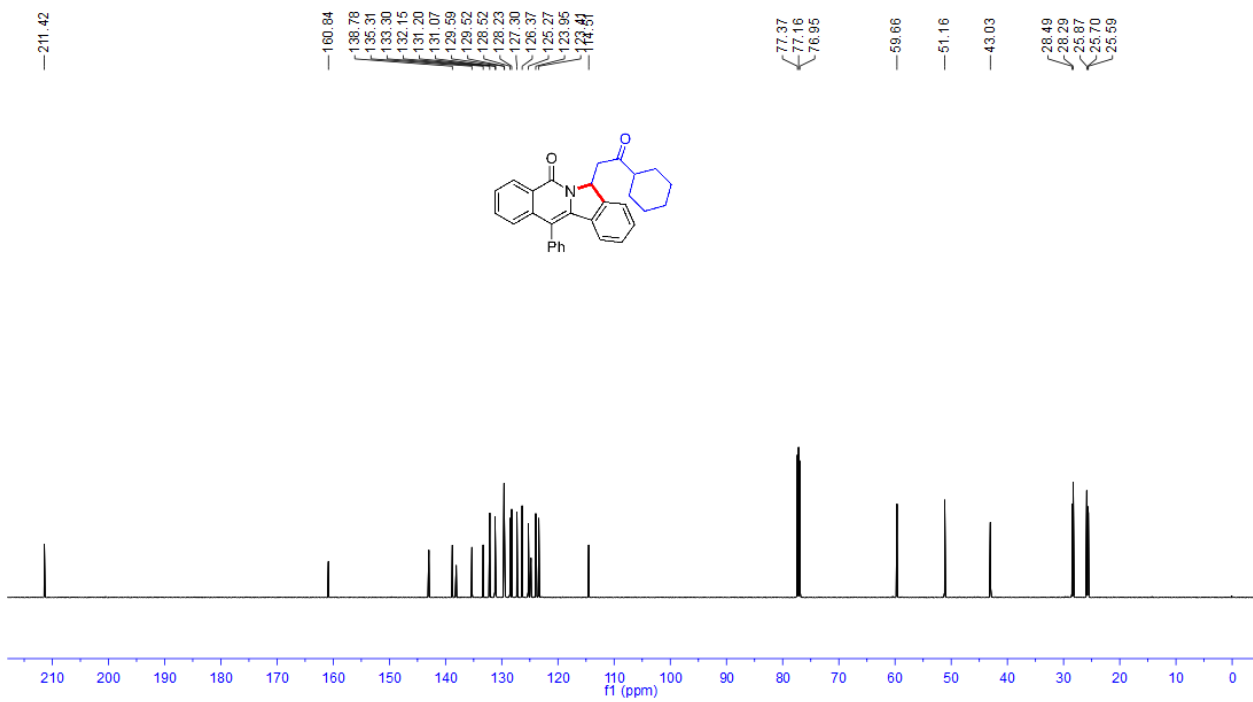

<sup>13</sup>C NMR spectrum of **3aa** (CDCl<sub>3</sub>, 151 MHz)

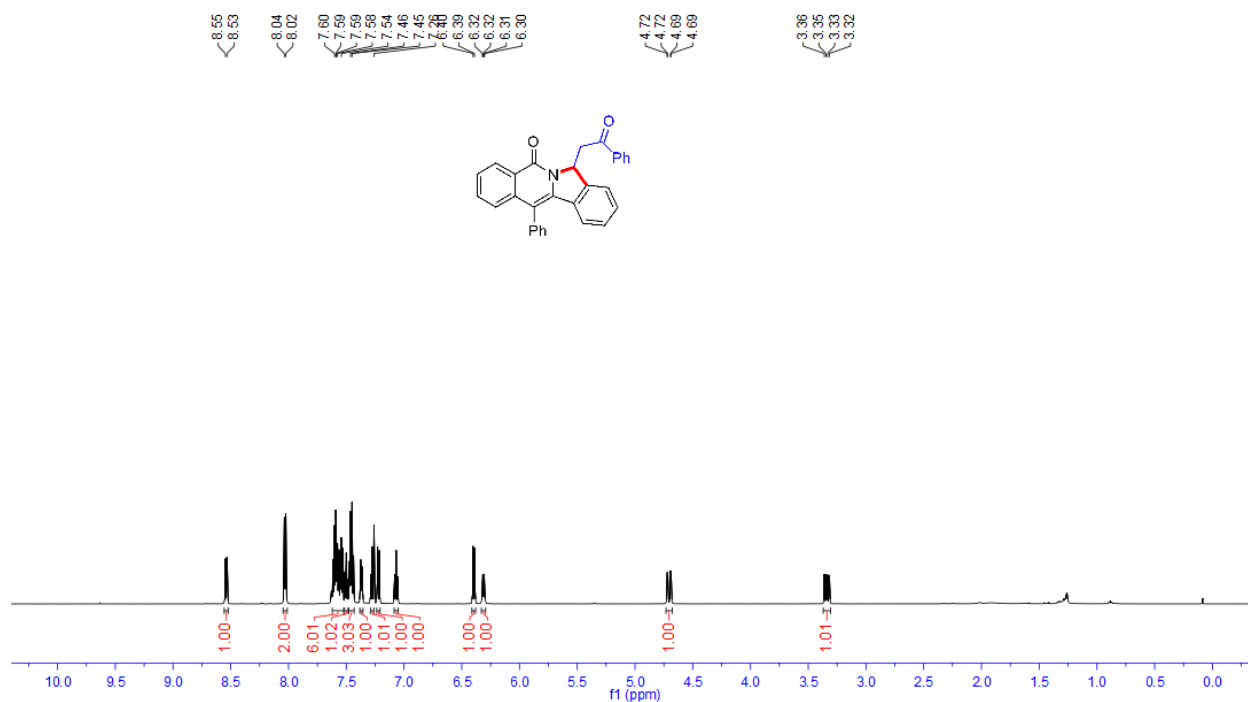

$^1\text{H}$  NMR spectrum of **3ab** ( $\text{CDCl}_3$ , 600 MHz)

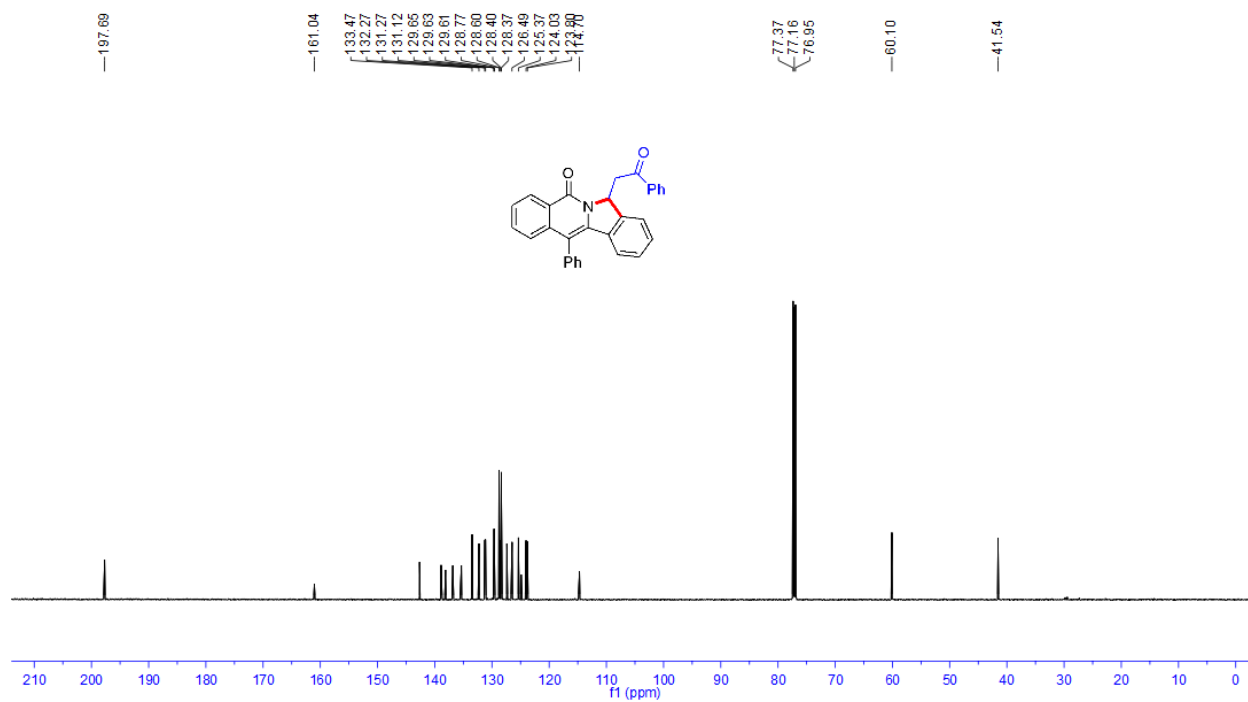

$^{13}\text{C}$  NMR spectrum of **3ab** ( $\text{CDCl}_3$ , 151 MHz)

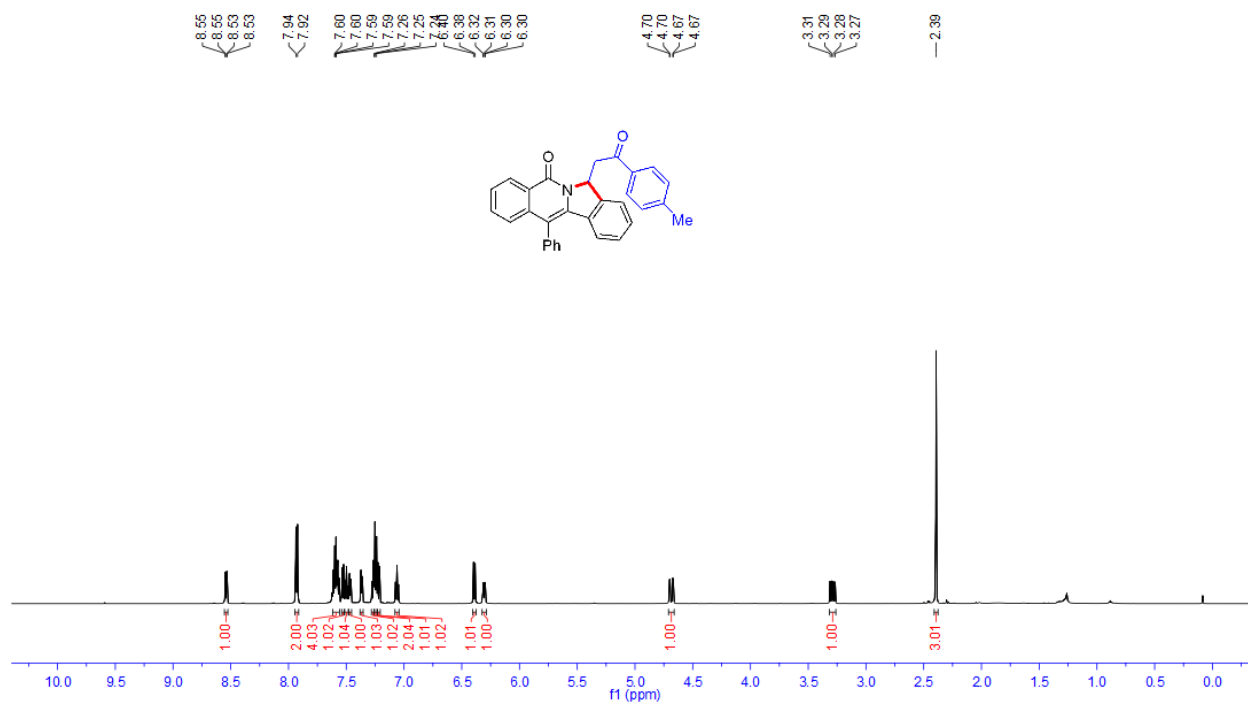

<sup>1</sup>H NMR spectrum of **3ac** (CDCl<sub>3</sub>, 600 MHz)

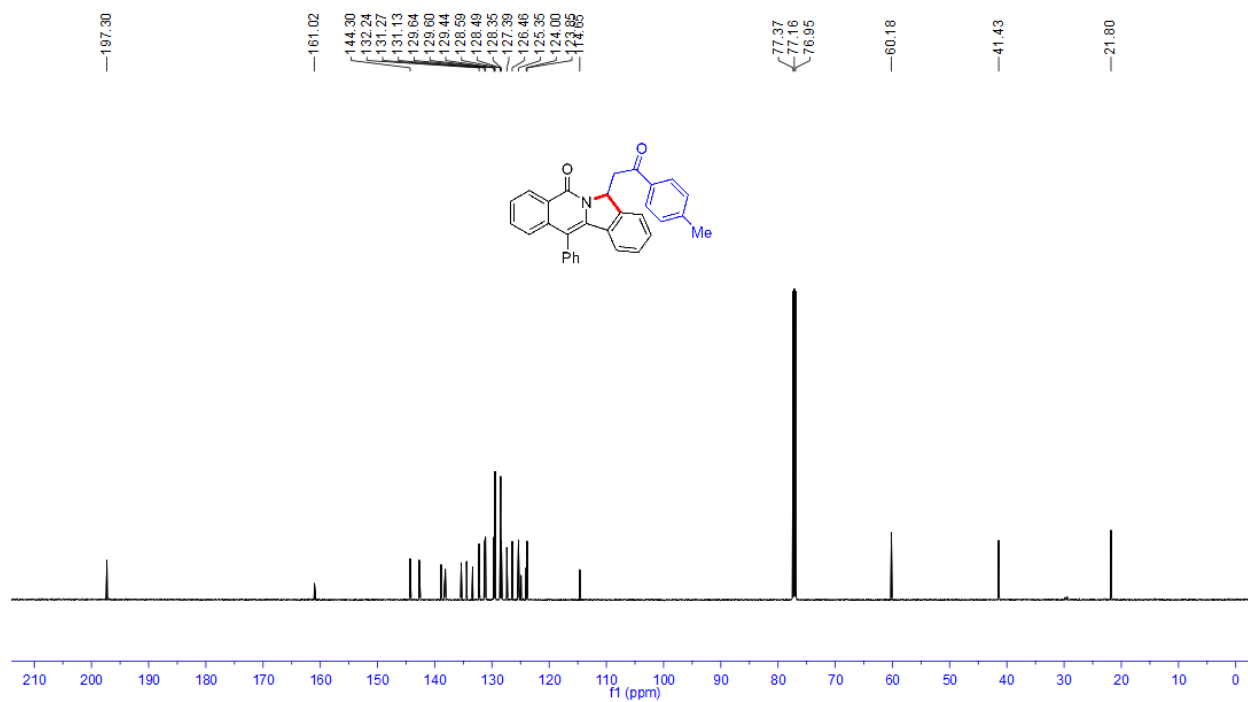

<sup>13</sup>C NMR spectrum of **3ac** (CDCl<sub>3</sub>, 151 MHz)

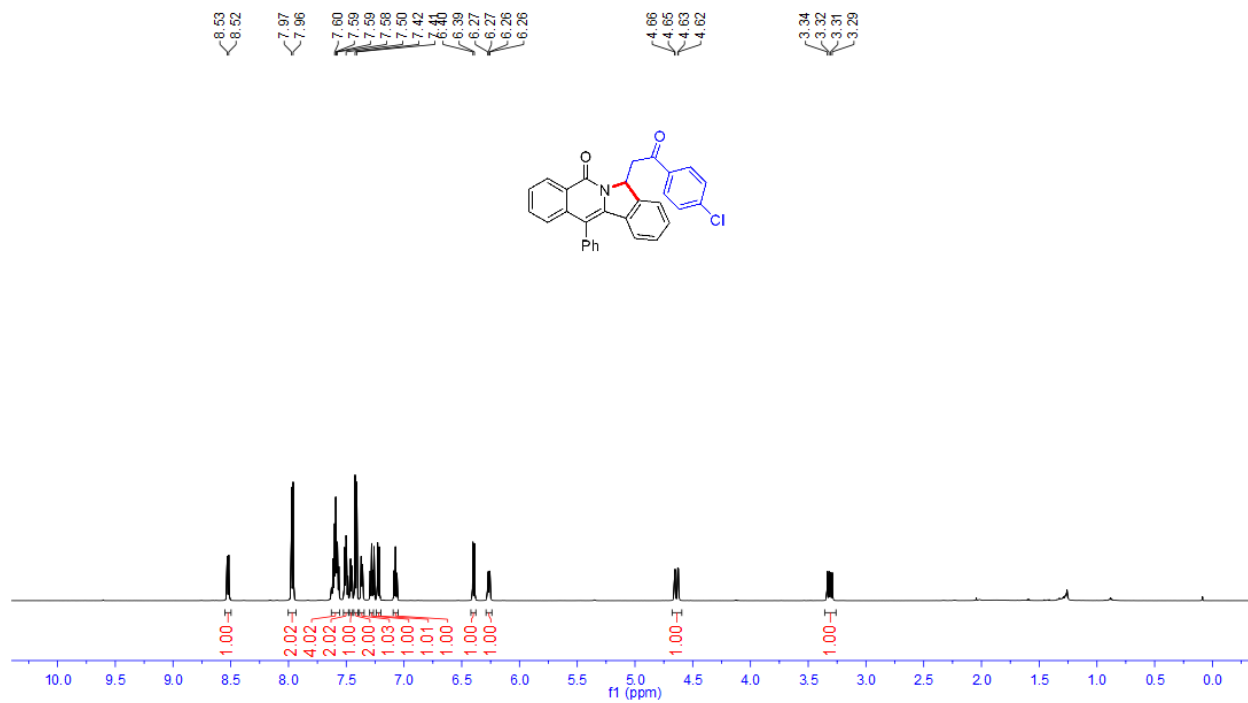

<sup>1</sup>H NMR spectrum of **3ad** (CDCl<sub>3</sub>, 600 MHz)

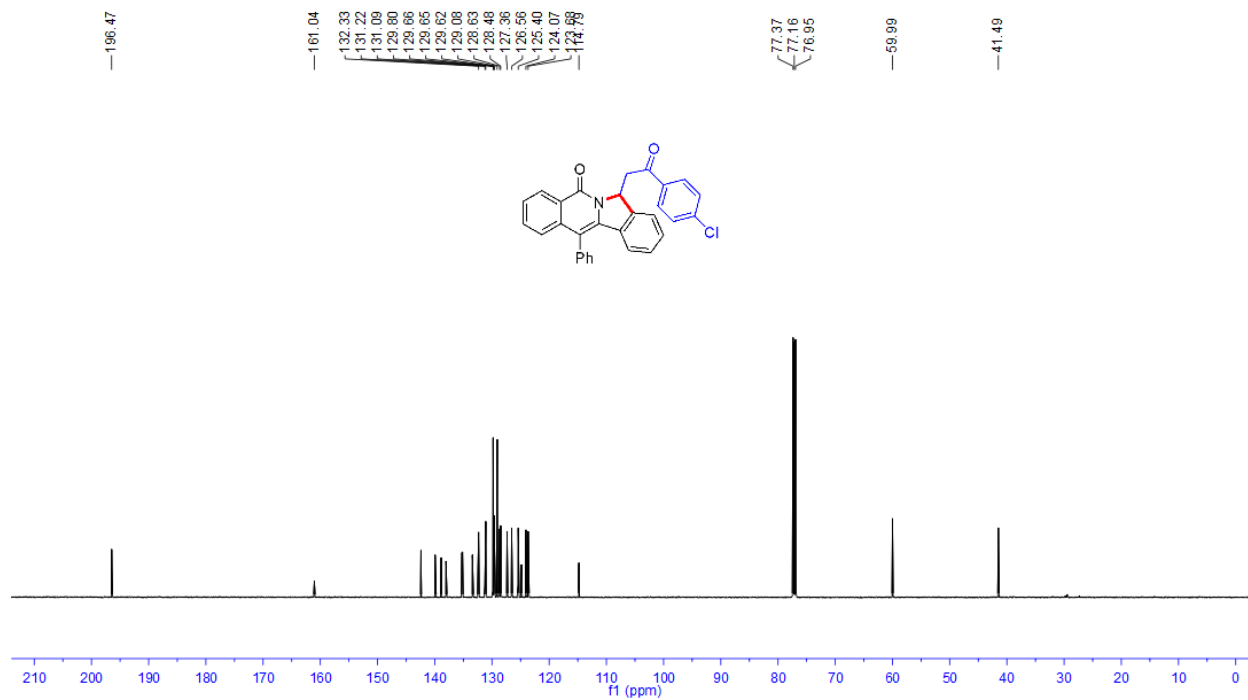

<sup>13</sup>C NMR spectrum of **3ad** (CDCl<sub>3</sub>, 151 MHz)

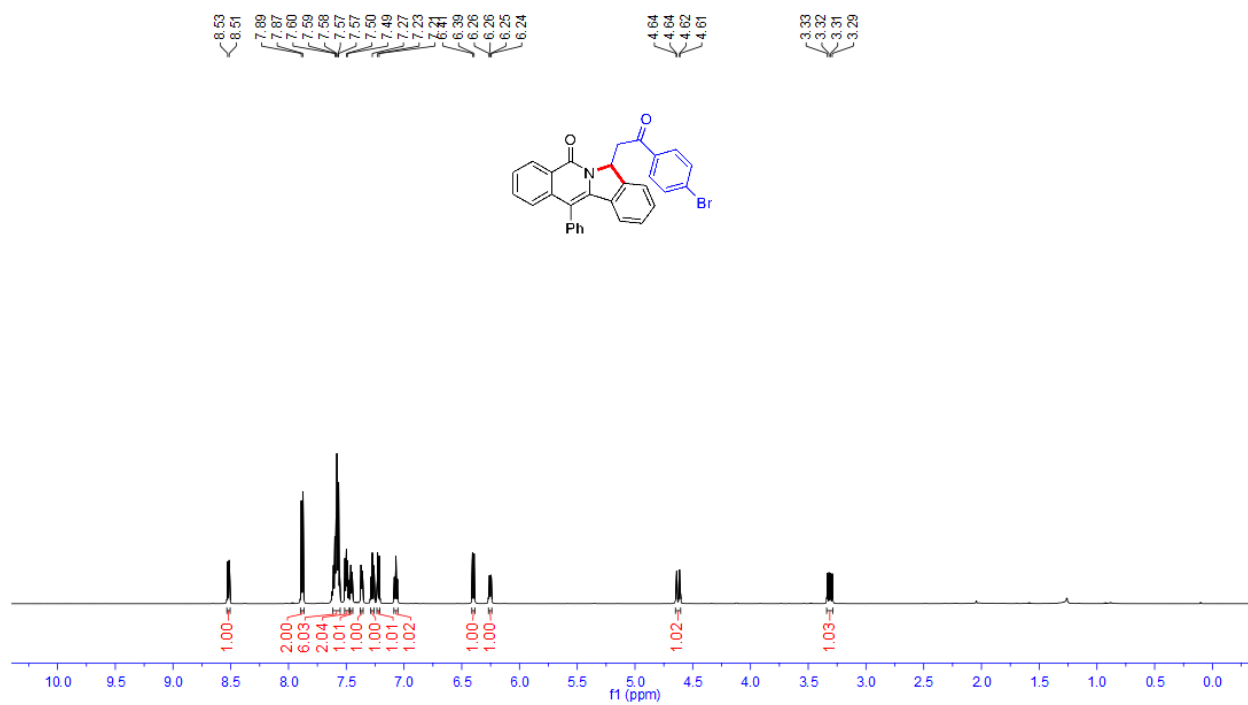

<sup>1</sup>H NMR spectrum of **3ae** (CDCl<sub>3</sub>, 600 MHz)

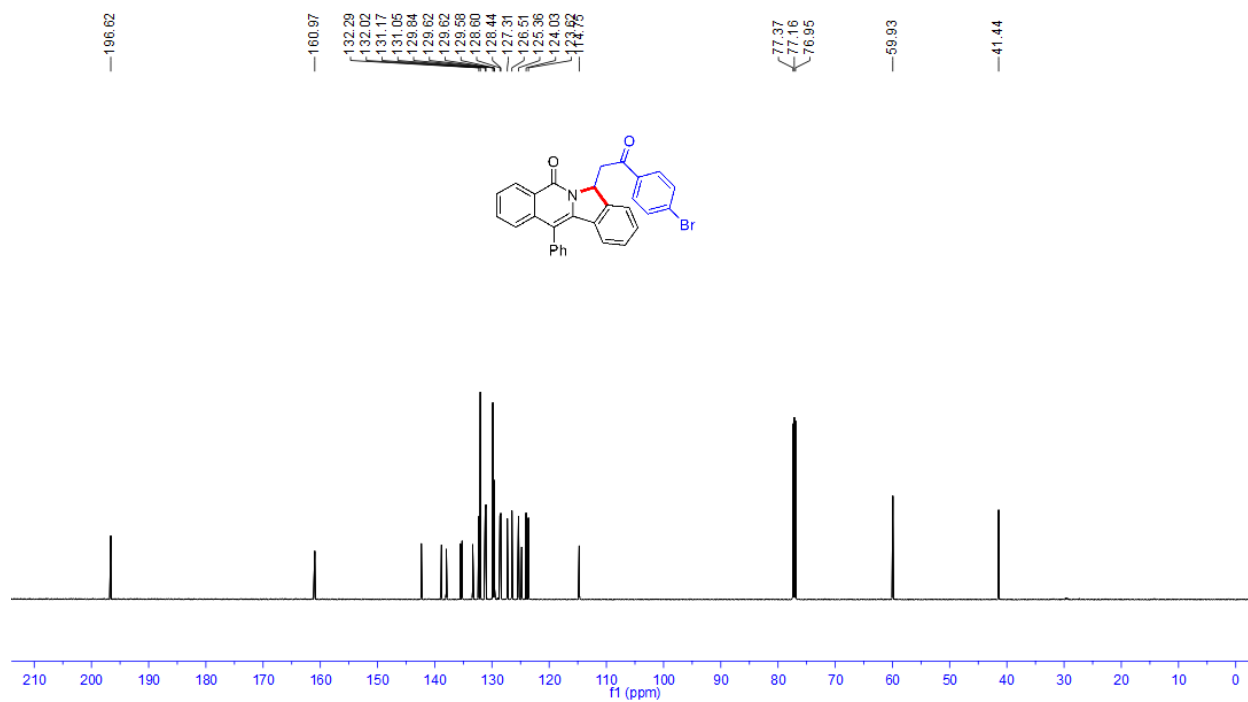

<sup>13</sup>C NMR spectrum of **3ae** (CDCl<sub>3</sub>, 151 MHz)

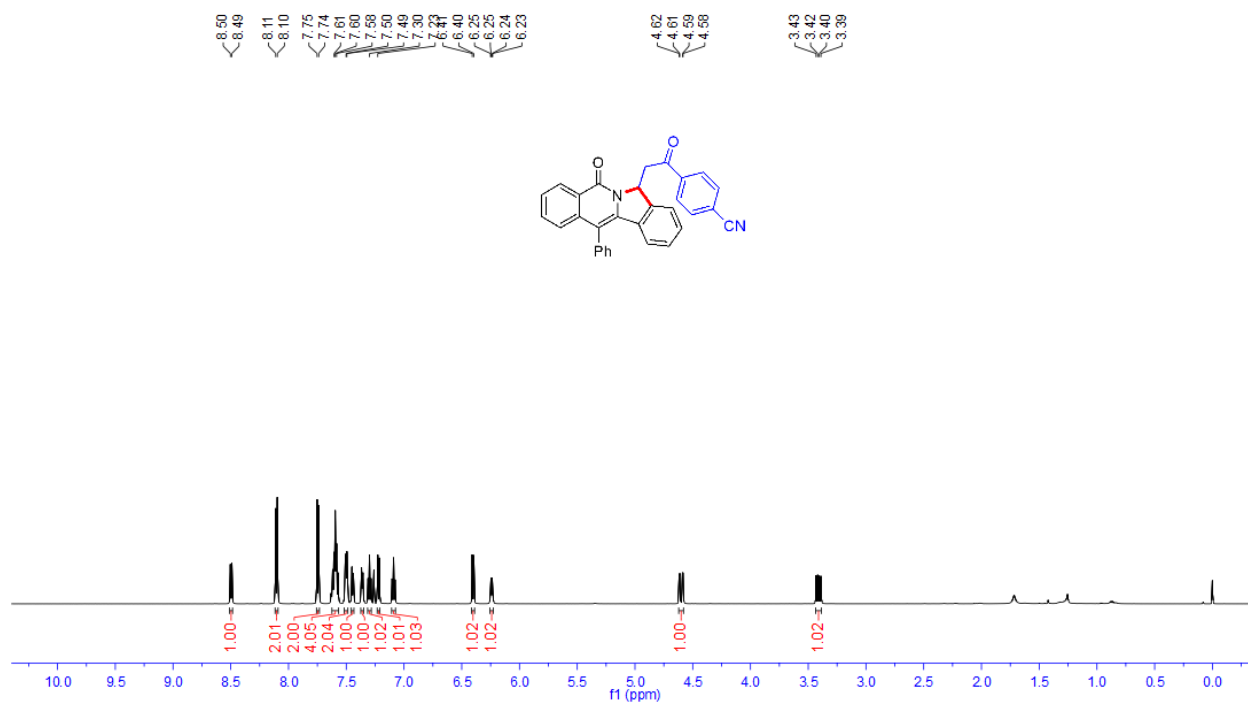

<sup>1</sup>H NMR spectrum of **3af** (CDCl<sub>3</sub>, 600 MHz)

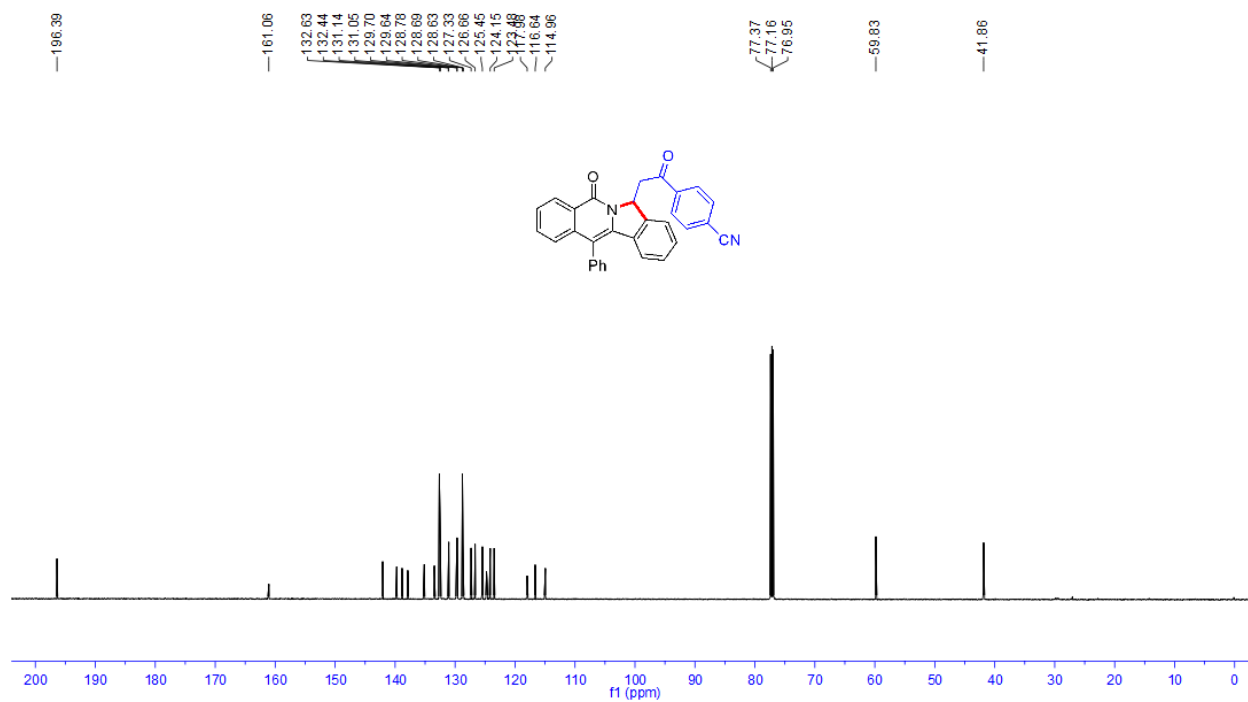

<sup>13</sup>C NMR spectrum of **3af** (CDCl<sub>3</sub>, 151 MHz)





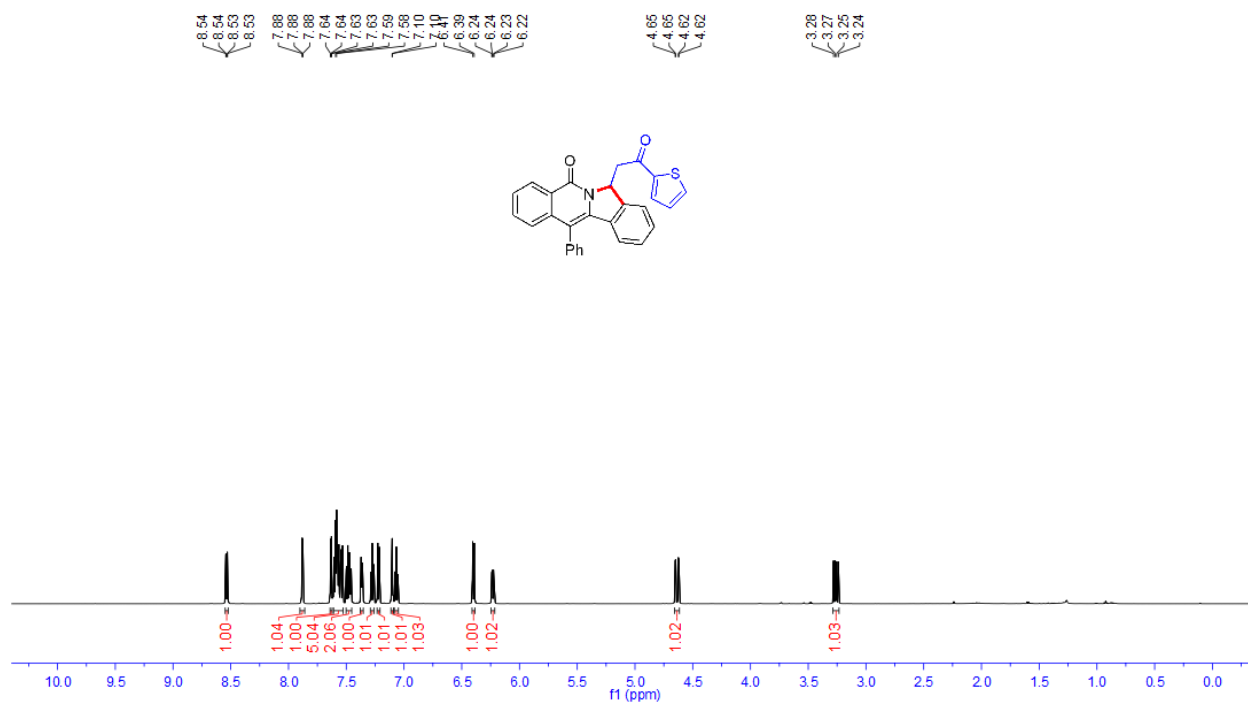

<sup>1</sup>H NMR spectrum of **3ah** (CDCl<sub>3</sub>, 600 MHz)

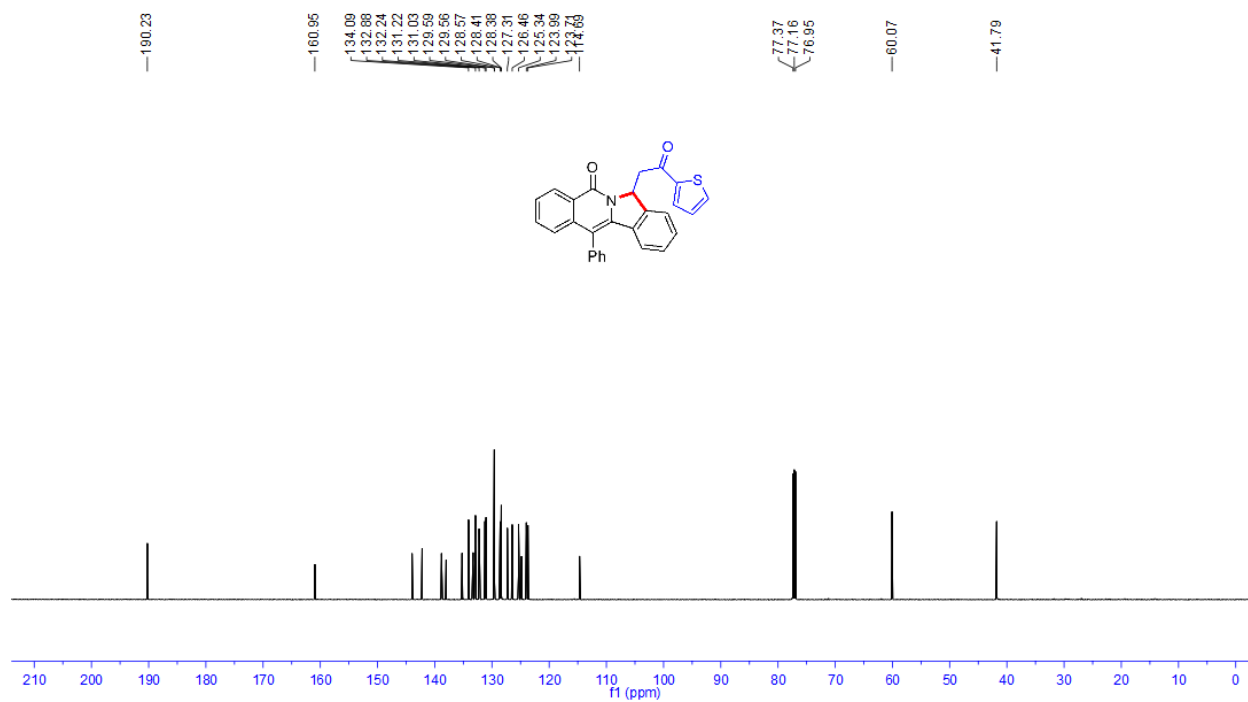

<sup>13</sup>C NMR spectrum of **3ah** (CDCl<sub>3</sub>, 151 MHz)

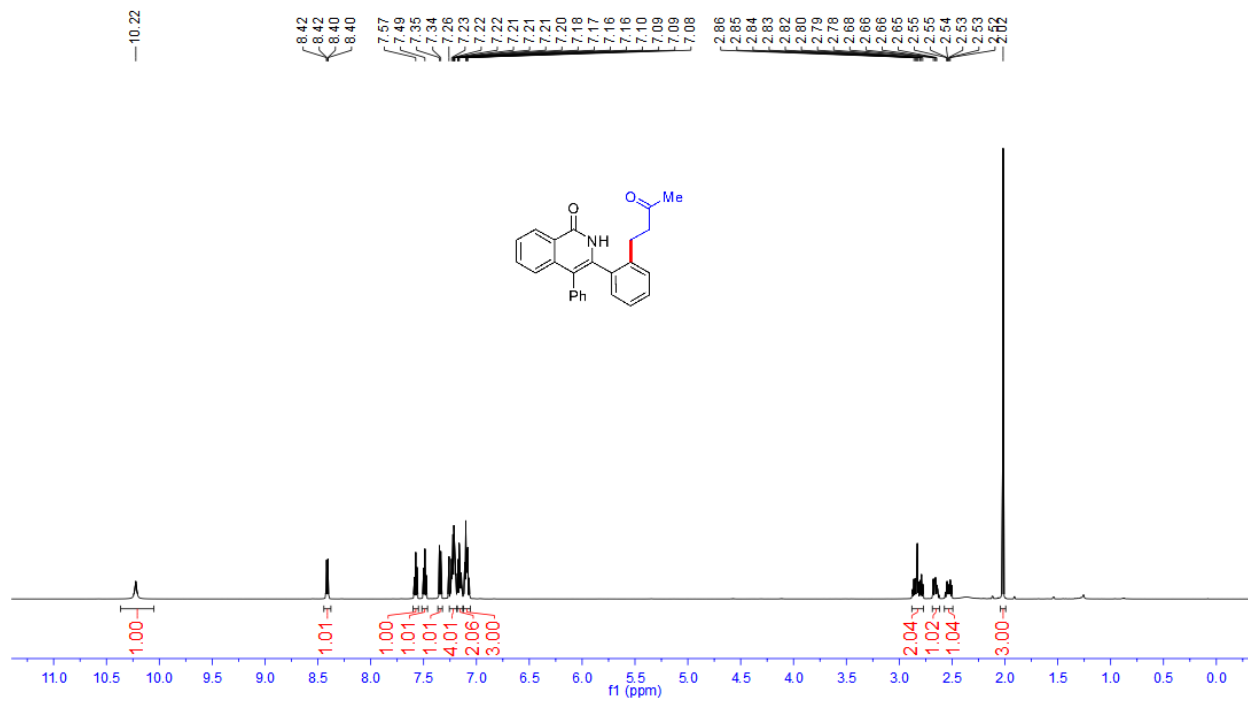

$^1\text{H}$  NMR spectrum of **4** ( $\text{CDCl}_3$ , 600 MHz)

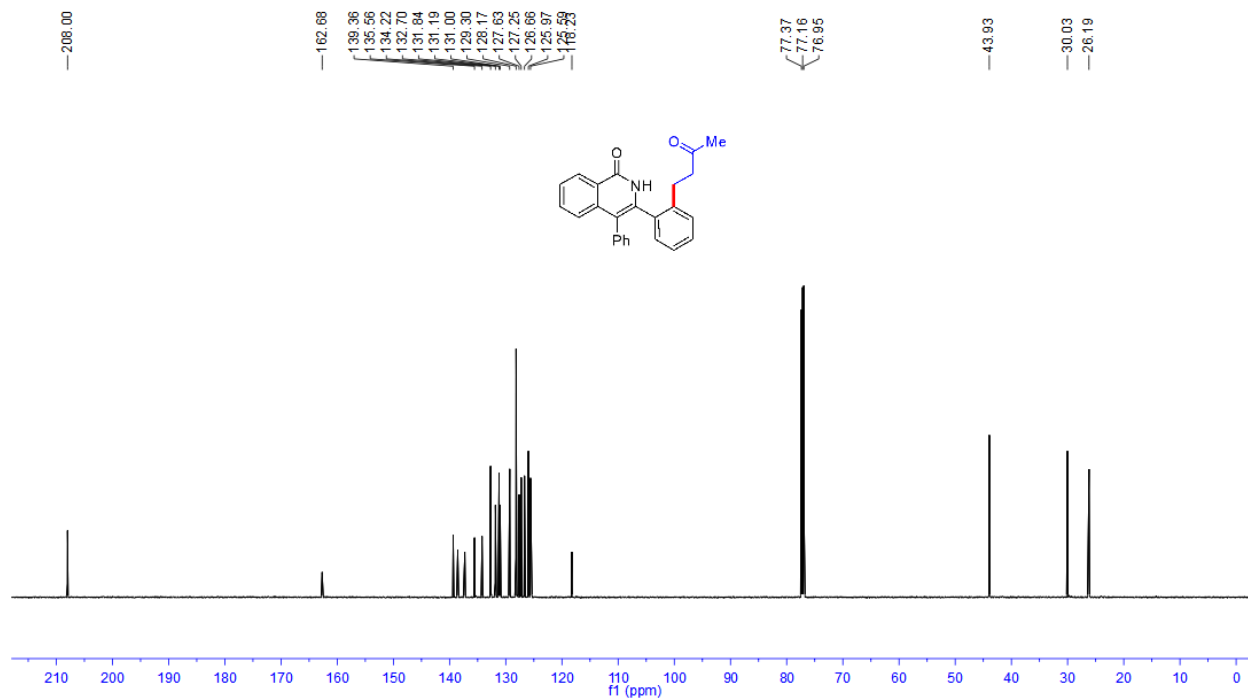

$^{13}\text{C}$  NMR spectrum of **4** ( $\text{CDCl}_3$ , 151 MHz)

## 7. The X-ray crystal structure for compound 3a

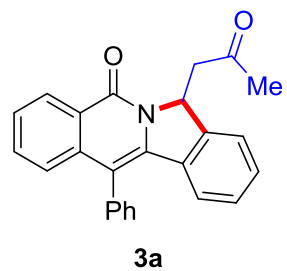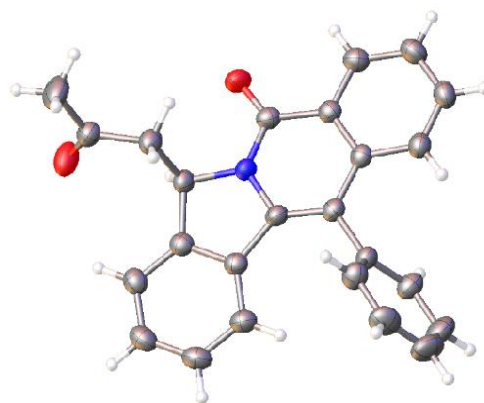

CCDC 2104610

## 8. References

1. (a) N. Guimond, C. Gouliaras and K. Fagnou, *J. Am. Chem. Soc.*, 2010, **132**, 6908-6909; (b) N. Guimond, S. I. Gorelsky and K. Fagnou, *J. Am. Chem. Soc.*, 2011, **133**, 6449-6457; (c) B. Li, H. Feng, S. Xu and B. Wang, *Chem.-Eur. J.*, 2011, **17**, 12573-12577; (d) Y. Shi, X. Zhu, H. Mao, H. Hu, C. Zhu and Y. Cheng, *Chem.-Eur. J.*, 2013, **19**, 11553-11557.
2. M. Lafrance, M. Roggen and E. M. Carreira, *Angew. Chem., Int. Ed.*, 2012, **51**, 3470-3473.
